# Supplementary material for: Simple ruthenium-catalyzed reductive amination enables the synthesis of a broad range of primary amines
Source: PubMed Central journal article supplement (PMC6175844; doi:10.1038/s41467-018-06416-6), 2018-10-08
Supplement: 41467_2018_6416_MOESM1_ESM.pdf [file 41467_2018_6416_MOESM1_ESM.pdf]

## **Supporting Information**

**Simple ruthenium-catalyzed reductive amination enables the synthesis of a broad range of primary amines**

Senthamarai, et al

## **Supplementary methods**

### **Detailed procedure the preparation of primary amines by Leuckart-Wallach reaction**

To a 250ml four-necked flask, equipped with a dropping-funnel, thermometer, water segregator and down-directed condenser, 5 equivalents of ammonium formate were added and stirred at 120°C to melt the solid ammonium formate. After complete melting of ammonium formate, 1-5 mmol of substrate (carbonyl compound) was added and allowed to react for 24 h at 140 °C. Then, the flask was cooled down to the room temperature and the obtained formamide of the corresponding amine was hydrolyzed with 5 equivalents of concentrated aqueous hydrochloric acid (36-38%) by refluxing at 110 °C for 9 h. After cooling to the room temperature, the reaction mixture was diluted with 15 ml of water and filtered. Then the filtrate was extracted with 30ml ether to remove water-insoluble material. The filtrate containing the corresponding amine in HCl salt form was neutralized with aqueous NaOH (15%) and extracted thoroughly with ether (5 x 50 mL). The ether fractions were combined and were evaporated to obtain the corresponding primary amine.

## **Supplementary note**

### **Concentration of **5** in Fig. 1a (manuscript)**

In the concentration-time graph (Fig. 1a), **5** appears to be formed at the beginning of the reaction and then seems to be consumed during further reaction progress. **5**, however, cannot be converted to any other product under our reaction conditions (*vide supra*). We therefore sought for an explanation of the apparent formation and decrease of **5**. As can be seen in Fig. 1d, the hydrogenation activity of the catalyst system drops rapidly for temperatures > 130 °C. Therefore, we expect that while the reaction is cooled down, the hydrogenation reactions quickly ceases, leading to a higher concentration of primary imine. While the thermal energy is still sufficient, the primary imine can then trimerize (which proceeds even at room temperature, see Ref. 78 manuscript) and cyclize (which requires elevated temperature) to form **5**. While this side reaction during cool down would not affect the optimized reaction (since there is no primary imine left after complete hydrogenation), it could occur for incomplete reactions (e.g. when the reaction is stopped prematurely). In line with this reasoning, we found that when the optimized benzaldehyde amination is stopped after just 30 min, 30% yield for **5** is obtained (see Fig. S4). Therefore, we propose that formation and apparent decrease of **5** in the concentration-time profile is an artifact resulting from prematurely quenching the reaction.

## Supplementary Tables

**Supplementary Table 1.** Preparation of primary amines from aldehydes and ketones by Leuckart-Wallach reaction.

| Entry | Aldehyde /Ketone                                                                    | Conv. | Yield of formamide (GC/GCMS yield)                                                | Yield of primary amine (isolated yield)                           |
|-------|-------------------------------------------------------------------------------------|-------|-----------------------------------------------------------------------------------|-------------------------------------------------------------------|
| 1     | 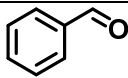   | >99   | 85%<br>(10% diamino benzyl formamide)<br>(3% tri benzylamine)                     | 75%                                                               |
| 2     |    | 75%   | 60% formamide<br>14% diamine                                                      | 53%<br>(14% diamine)                                              |
| 3     |    | 80%   | 75%                                                                               | 70%                                                               |
| 4     |  | >99%  | 90%<br>(5-8% of corresponding acid)                                               | 5%<br>(84% of benzyl amine. Boronic acid ester group was cleaved) |
| 5     |  | >99%  | 20%<br>(78% of other products were observed)                                      | 15%                                                               |
| 6     |  | >99%  | 25%<br>(20% pyridyl carboxylic acid. 53% other products)                          | 15%                                                               |
| 7     |  | >99%  | 10%<br>(88% quinoline carboxylic acid)                                            | 5%                                                                |
| 8     |  | >99%  | 30%<br>(20% one C-C double bond cleaved formamide product. 48% of other products) | 10%                                                               |

|    |                                                                                     |      |                                                                                                    |                                |
|----|-------------------------------------------------------------------------------------|------|----------------------------------------------------------------------------------------------------|--------------------------------|
| 9  | 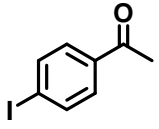   | 30%  | 27%                                                                                                | 5%<br>(20% of de-iodo product) |
| 10 |    | >99% | 0%<br>(90% N-Benzyl-formamide.<br>9% benzoic acid.<br>trimethylsilyl group was completely cleaved) | 0%<br>(88% benzylamine)        |
| 11 |    | <2%  | <1%                                                                                                | <1%                            |
| 12 |    | >99  | <2%<br>(95% N-Benzyl-formamide. A cleaved product)                                                 | <1%<br>(90% benzylamine)       |
| 13 |  | <2%  | >1%                                                                                                | -                              |
| 14 |  | >99% | 0%<br>(formamide was not observed. Other products were observed)                                   | 0%                             |
| 15 |  | <1%  | <1%                                                                                                | <1%                            |

**Reaction conditions:** 1-5 mmol of substrate, 5 equivalents of ammonium formate, 140 °C, 24 h. After the formation of corresponding formamide, 5 equivalents of aq. HCl (concentrated 37%) was added and refluxed at 110 °C for 9h and filtered, washed with diethyl ether and then the filtrate was neutralized with NaOH. Finally, the product was extracted thoroughly with ethyl acetate to obtain the corresponding free primary amine.

**Supplementary Table 2.** Reductive amination of selected aldehydes and ketones using different  $\text{RuCl}_2(\text{PPh}_3)_3$  loading

| Entry | Aldehyde/ketone                                                                     | $\text{RuCl}_2(\text{PPh}_3)_3$ loading (mol%) | Conversion | Product (s) (GC yield(s))                                            |
|-------|-------------------------------------------------------------------------------------|------------------------------------------------|------------|----------------------------------------------------------------------|
| 1     | 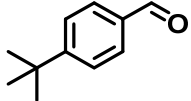   | 0.1                                            | 80%        | 0% Primary amine<br>77% Secondary imine                              |
| 2     |    | 0.5                                            | 80%        | 19% Primary amine<br>60% Secondary imine                             |
| 3     |    | 1                                              | 99%        | 70% Primary amine<br>25% Secondary imine<br>4% Side product <b>5</b> |
| 4     |  | 0.1                                            | 10%        | 9% secondary imine                                                   |
| 5     |  | 0.5                                            | 80%        | 60% Primary amine<br>15% Alcohol<br>20% Secondary imine              |
| 6     |  | 1                                              | 99%        | 95% Primary amine<br>5% Alcohol                                      |
| 7     |  | 1                                              | 99%        | 99% Secondary imine                                                  |
| 8     |  | 1                                              | 99%        | 99% Secondary imine                                                  |
| 9     |  | 1                                              | 30%        | 30% Imine                                                            |

|    |                                                                                     |   |     |                                                         |
|----|-------------------------------------------------------------------------------------|---|-----|---------------------------------------------------------|
| 10 | 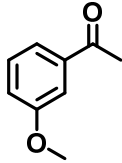   | 1 | 30% | 25% Primary amine                                       |
| 11 |    | 1 | 30% | 20% Primary amine<br>5% Alcohol                         |
| 12 |    | 1 | 80% | 50% Primary amine<br>20% Alcohol<br>10% Secondary imine |
| 13 |    | 1 | 75% | 25% Primary amine<br>50% Alcohol                        |
| 14 |   | 1 | 40% | 20% Primary amine<br>20% Alcohol                        |
| 15 |  | 1 | 70  | 65% Secondary imine                                     |
| 16 |  | 2 | 90% | 25% Primary amine<br>65% Alcohol                        |
| 17 |  | 2 | 88% | 40% Primary amine<br>48% Alcohol                        |
| 18 |  | 2 | 85% | 70% Primary amine<br>15% Alcohol                        |

Reaction conditions: 0.5 mmol benzaldehyde/ketone, 0.1-2 mol%  $\text{RuCl}_2(\text{PPh}_3)_3$ , 5-7 bar  $\text{NH}_3$ , 40 bar  $\text{H}_2$  1.5 mL t-amyl alcohol, 130 °C, 24 h

## NMR data of amines

### TM5-252

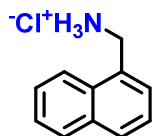

$^1\text{H NMR}$  (300 MHz, DMSO- $d_6$ ):  $\delta$  8.64 (br s, 3H), 8.20 – 8.12 (m, 1H), 8.04 – 7.95 (m, 2H), 7.71 – 7.53 (m, 4H), 4.52 (s, 2H).

$^{13}\text{C NMR}$  (75 MHz, DMSO):  $\delta$  133.67, 131.12, 130.45, 129.48, 129.10, 127.74, 127.21, 126.69, 125.82, 123.93, 40.81. Brown solid.

### TM5-325

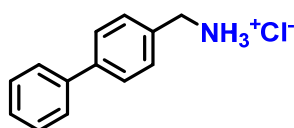

$^1\text{H NMR}$  (400 MHz, DMSO- $d_6$ ):  $\delta$  8.70 (br s, 3H), 7.74 – 7.59 (m, 6H), 7.52 – 7.32 (m, 3H), 4.05 (s, 2H).

$^{13}\text{C NMR}$  (101 MHz, DMSO):  $\delta$  140.61, 139.99, 133.76, 130.08, 129.45, 128.13, 127.20, 127.15, 42.24. White solid.

### TM5-210

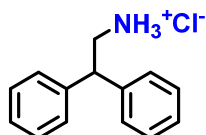

$^1\text{H NMR}$  (300 MHz, DMSO- $d_6$ ):  $\delta$  8.24 (br s, 3H), 7.42 – 7.19 (m, 10H), 4.44 (t,  $J = 7.8$  Hz, 1H), 3.57 (d,  $J = 6.3$  Hz, 2H).

$^{13}\text{C NMR}$  (75 MHz, DMSO):  $\delta$  141.53, 129.24, 128.29, 127.47, 48.90, 42.90. Off-White solid.

### TM5-244

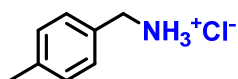

$^1\text{H NMR}$  (300 MHz, DMSO- $d_6$ ):  $\delta$  8.62 (br s, 3H), 7.42 (d,  $J = 8.0$  Hz, 2H), 7.18 (d,  $J = 7.8$  Hz, 2H), 3.94 (s, 2H), 2.29 (s, 3H).

$^{13}\text{C NMR}$  (75 MHz, DMSO):  $\delta$  138.08, 131.51, 129.46, 129.46, 42.34, 21.24. White solid.

TM5-200

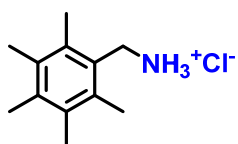

$^1\text{H NMR}$  (400 MHz, DMSO- $d_6$ ):  $\delta$  8.31 (br s, 3H), 4.05 (s, 2H), 2.23 (s, 15H).

$^{13}\text{C NMR}$  (101 MHz, DMSO):  $\delta$  135.75, 133.51, 132.70, 128.46, 37.73, 16.97. White solid.

TM5-331

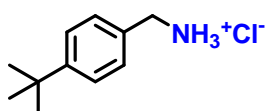

$^1\text{H NMR}$  (400 MHz, DMSO- $d_6$ ):  $\delta$  8.68 (br s, 3H), 7.28 (d,  $J = 7.8$  Hz, 2H), 7.11 (d,  $J = 7.8$  Hz, 2H), 3.94 (s, 2H), 1.25 (s, 9H).

$^{13}\text{C NMR}$  (101 MHz, DMSO):  $\delta$  151.24, 131.58, 129.29, 125.67, 42.21, 34.76, 31.53. pale Brown solid.

TM5-220

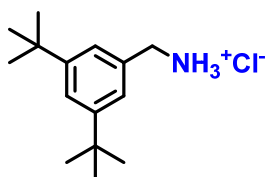

$^1\text{H NMR}$  (300 MHz, DMSO- $d_6$ ):  $\delta$  8.61 (br s, 3H), 7.38 (s, 2H), 7.31 (s, 1H), 3.95 (s, 2H), 1.24 (s, 18H).

$^{13}\text{C NMR}$  (75 MHz, DMSO):  $\delta$  150.96, 133.50, 123.79, 122.08, 43.16, 35.01, 31.67. White solid.

TM5-226

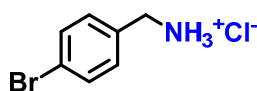

$^1\text{H NMR}$  (400 MHz, DMSO- $d_6$ ):  $\delta$  8.61 (br s, 3H), 7.63 (d,  $J = 8.3$  Hz, 2H), 7.51 (d,  $J = 8.5$  Hz, 2H), 4.12 (s, 2H).

$^{13}\text{C NMR}$  (101 MHz, DMSO):  $\delta$  133.94, 131.85, 131.77, 122.15, 41.90. Brown Solid.



TM5-328

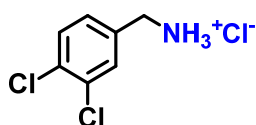

**<sup>1</sup>H NMR (300 MHz, DMSO-*d*<sub>6</sub>):** δ 8.72 (br s, 3H), 7.87 (d, *J* = 2.0 Hz, 1H), 7.67 (d, *J* = 8.3 Hz, 1H), 7.54 (dd, *J* = 8.3, 2.1 Hz, 1H), 4.04 (s, 2H).

**<sup>13</sup>C NMR (75 MHz, DMSO):** δ 135.62, 131.70, 131.50, 131.42, 131.07, 130.01, 41.36. White solid.

TM5-330

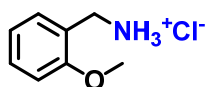

**<sup>1</sup>H NMR (300 MHz, DMSO-*d*<sub>6</sub>):** δ 8.52 (br s, 3H), 7.51 – 7.29 (m, 2H), 7.13 – 6.59 (m, 2H), 3.94 (s, 2H), 3.82 (s, 3H).

**<sup>13</sup>C NMR (75 MHz, DMSO):** δ 157.58, 130.71, 130.56, 122.20, 120.69, 111.34, 56.04, 37.83. Off-White solid.

TM5-245

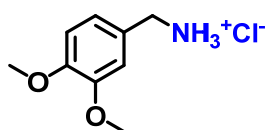

**<sup>1</sup>H NMR (300 MHz, DMSO-*d*<sub>6</sub>):** δ 8.63 (br s, 3H), 7.30 (s, 1H), 7.13 (d, *J* = 8.3 Hz, 2H), 3.92 (s, 2H), 3.76 (s, 6H).

**<sup>13</sup>C NMR (75 MHz, DMSO):** δ 149.26, 149.04, 126.79, 121.93, 113.52, 112.00, 56.09, 56.06, 42.50. White solid.

TM5-375

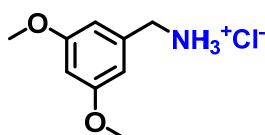

**<sup>1</sup>H NMR (300 MHz, DMSO-*d*<sub>6</sub>):** δ 8.83 (br s, 3H), 6.97 (s, 3H), 3.96 (s, 2H), 3.83 (s, 6H).

**<sup>13</sup>C NMR (75 MHz, DMSO):** δ 160.91, 136.64, 107.36, 100.40, 56.07, 55.80, 42.67. Off-White solid.

TM5-231

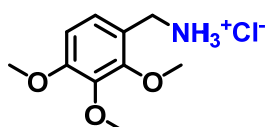

**<sup>1</sup>H NMR (300 MHz, DMSO-*d*<sub>6</sub>):** δ 8.56 (br s, 3H), 7.24 (d, *J* = 8.5 Hz, 1H), 6.83 (d, *J* = 8.5 Hz, 1H), 3.89 (s, 2H), 3.86 (s, 3H), 3.74 (s, 6H).

**<sup>13</sup>C NMR (75 MHz, DMSO):** δ 154.32, 151.78, 141.77, 125.21, 119.87, 108.14, 61.51, 60.86, 56.46, 37.13. Off-White solid.

TM5-243

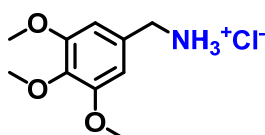

**<sup>1</sup>H NMR (300 MHz, DMSO-*d*<sub>6</sub>):** δ 8.71 (br s, 3H), 6.98 (s, 2H), 4.02 (s, 2H), 3.78 (s, 6H), 3.64 (s, 3H).

**<sup>13</sup>C NMR (75 MHz, DMSO):** δ 153.22, 137.73, 130.06, 107.10, 60.48, 56.52, 42.86. Off-White solid.

TM5-222

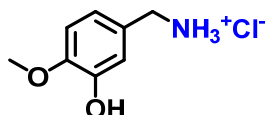

**<sup>1</sup>H NMR (300 MHz, DMSO-*d*<sub>6</sub>):** δ 10.12 (br s, 1H), 8.32 (br s, 3H), 7.25 – 6.73 (m, 3H), 3.84 (s, 2H), 3.76 (s, 3H).

**<sup>13</sup>C NMR (75 MHz, DMSO):** δ 148.32, 146.87, 126.75, 120.46, 116.78, 112.53, 56.16, 42.40. White solid.

TM5-246

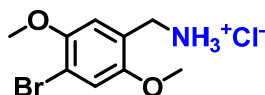

**<sup>1</sup>H NMR (400 MHz, DMSO-*d*<sub>6</sub>):** δ 8.63 (br s, 3H), 7.54 (s, 2H), 3.95 (s, 2H), 3.68 (s, 6H).

**<sup>13</sup>C NMR (101 MHz, DMSO):** δ 151.71, 149.67, 122.51, 116.31, 115.58, 111.18, 57.29, 56.87, 37.33. Off-White solid.

**TM5-324**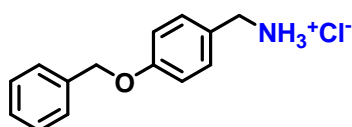

**<sup>1</sup>H NMR (400 MHz, DMSO-*d*<sub>6</sub>):** δ 8.53 (br s, 3H), 7.65 – 7.18 (m, 7H), 7.10 – 6.87 (m, 2H), 5.13 (s, 2H), 4.11 (s, 2H).

**<sup>13</sup>C NMR (101 MHz, DMSO):** δ 158.76, 137.41, 131.04, 128.90, 128.29, 128.08, 126.68, 115.25, 69.61, 42.06. Off-White solid.

**TM5-190**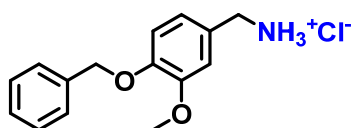

**<sup>1</sup>H NMR (300 MHz, DMSO-*d*<sub>6</sub>):** δ 8.50 (br s, 3H), 7.49 – 7.17 (m, 6H), 7.10 – 6.77 (d, *J* = 8.5 Hz, 2H), 5.10 (s, 2H), 3.99 (s, 2H), 3.80 (s, 3H).

**<sup>13</sup>C NMR (75 MHz, DMSO):** δ 149.48, 148.19, 137.48, 128.88, 128.31, 128.15, 127.12, 121.85, 113.87, 113.73, 70.31, 56.17, 42.56. Off-White solid.

**TM5-335**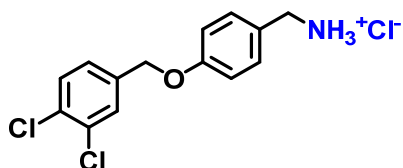

**<sup>1</sup>H NMR (400 MHz, DMSO-*d*<sub>6</sub>):** δ 8.55 (br s, 3H), 7.71 (d, *J* = 1.9 Hz, 1H), 7.67 – 7.62 (m, 1H), 7.49 – 7.41 (m, 3H), 7.06 – 7.01 (m, 2H), 5.15 (s, 2H), 3.92 (s, 2H).

**<sup>13</sup>C NMR (101 MHz, DMSO):** δ 158.34, 138.70, 131.55, 131.14, 131.10, 130.79, 129.83, 128.20, 127.02, 115.26, 68.03, 40.37. Off-white solid.

**TM5-357**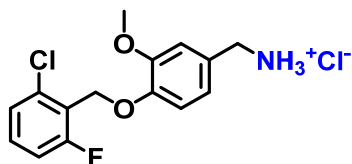

**<sup>1</sup>H NMR (300 MHz, DMSO-*d*<sub>6</sub>):** δ 8.43 (br s, 3H), 7.51 (td, *J* = 8.2, 6.1 Hz, 1H), 7.41 (dt, *J* = 8.1, 1.0 Hz, 1H), 7.36 – 7.21 (m, 2H), 7.14 (d, *J* = 8.2 Hz, 1H), 7.02 (dd, *J* = 8.2, 2.0 Hz, 1H), 5.12 (s, 2H), 3.95 (s, 2H), 3.74 (s, 3H).

**<sup>13</sup>C NMR (75 MHz, DMSO-*d*<sub>6</sub>):** δ 161.93 (d, *J* = 249.9 Hz), 149.51, 148.11, 135.99 (d, *J* = 5.2 Hz), 132.31 (d, *J* = 10.0 Hz), 127.80, 126.18 (d, *J* = 3.2 Hz), 122.46 (d, *J* = 17.9 Hz), 121.86, 115.22 (d, *J* = 22.4 Hz), 114.12, 113.69, 62.11 (d, *J* = 3.8 Hz), 56.05, 42.52. Off-White solid.

TM5-329

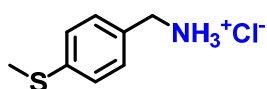

$^1\text{H NMR}$  (400 MHz,  $\text{DMSO-}d_6$ ):  $\delta$  8.68 (br s, 3H), 7.50 (d,  $J=7.9$  Hz, 2H), 7.31 (d,  $J=8.3$  Hz, 2H), 3.94 (s, 2H), 2.46 (s, 3H).

$^{13}\text{C NMR}$  (101 MHz,  $\text{DMSO}$ ):  $\delta$  138.95, 130.94, 130.18, 126.19, 42.08, 15.11. Brown solid.

TM5-227

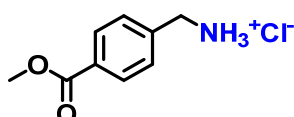

$^1\text{H NMR}$  (300 MHz,  $\text{DMSO-}d_6$ ):  $\delta$  8.75 (br s, 3H), 7.99 (d,  $J=8.7$  Hz, 2H), 7.51 (d,  $J=8.8$  Hz, 2H), 4.10 (s, 2H), 3.86 (s, 3H).

$^{13}\text{C NMR}$  (75 MHz,  $\text{DMSO}$ ):  $\delta$  166.37, 139.91, 129.91, 129.74, 129.69, 52.71, 42.16. Off-White solid.

TM5-194

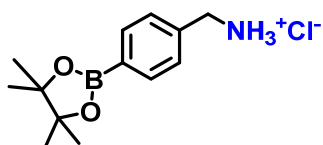

$^1\text{H NMR}$  (300 MHz,  $\text{DMSO-}d_6$ ):  $\delta$  8.61 (br s, 3H), 7.48 (d,  $J = 8.4$  Hz, 2H), 7.32 (d,  $J = 9.8$  Hz, 2H), 4.02 (s, 2H), 1.29 (s, 12H).

$^{13}\text{C NMR}$  (75 MHz,  $\text{DMSO}$ ):  $\delta$  137.82, 134.95, 134.73, 128.79, 84.21, 42.52, 25.13. Off-White solid.

TM5-230

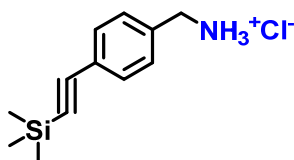

$^1\text{H NMR}$  (300 MHz,  $\text{DMSO-}d_6$ ):  $\delta$  8.23 (br s, 3H), 7.26-7.16 (m, 4H), 3.80 (s, 2H), 0.00 (s, 9H).

$^{13}\text{C NMR}$  (75 MHz,  $\text{DMSO}$ ):  $\delta$  134.44, 131.35, 128.83, 121.81, 104.28, 65.98, 41.47, -0.50. Off-White solid.

TM5-336

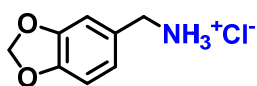

$^1\text{H NMR}$  (300 MHz, DMSO- $d_6$ ):  $\delta$  8.56 (br s, 3H), 7.26 – 6.70 (m, 3H), 6.01 (s, 2H), 3.91 (s, 2H).

$^{13}\text{C NMR}$  (75 MHz, DMSO):  $\delta$  147.70, 147.66, 128.00, 123.41, 109.99, 108.65, 101.65, 42.46.

Off-White solid.

M5-183

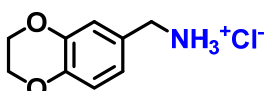

$^1\text{H NMR}$  (300 MHz, DMSO- $d_6$ ):  $\delta$  8.36 (br s, 3H), 7.03 (d,  $J$  = 2.0 Hz, 1H), 6.93 (dd,  $J$  = 8.3, 2.1 Hz, 1H), 6.83 (d,  $J$  = 8.2 Hz, 1H), 4.23 (s, 2H), 3.56 (s, 4H).

$^{13}\text{C NMR}$  (75 MHz, DMSO):  $\delta$  143.98, 143.62, 127.30, 122.52, 118.34, 117.53, 64.53, 42.15.

White solid.

TM5-353

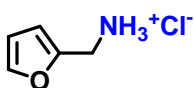

$^1\text{H NMR}$  (300 MHz, DMSO- $d_6$ ):  $\delta$  8.74 (br s, 3H), 7.69 (d,  $J$  = 1.9 Hz, 1H), 6.70 (d,  $J$  = 5.6 Hz, 2H), 4.02 (s, 2H).

$^{13}\text{C NMR}$  (75 MHz, DMSO):  $\delta$  147.88, 143.96, 111.38, 110.86, 35.41. Off-White solid.

M5-196

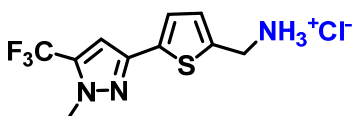

$^1\text{H NMR}$  (300 MHz, DMSO- $d_6$ ):  $\delta$  8.80 (br s, 3H), 7.45 (d,  $J$  = 3.6 Hz, 1H), 7.33 – 7.27 (m, 2H), 4.11 (s, 2H), 3.95 (s, 3H).

$^{13}\text{C NMR}$  (101 MHz, DMSO- $d_6$ ):  $\delta$  145.34, 135.75, 135.55, 132.40 (q,  $J$  = 38.8 Hz), 130.27, 125.43, 120.15 (q,  $J$  = 268.8 Hz), 105.26, 38.51, 37.25. Pale brown solid.

TM5-191

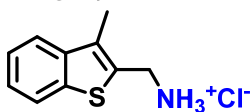

$^1\text{H NMR}$  (300 MHz, DMSO- $d_6$ ):  $\delta$  8.73 (br s, 3H), 8.00 – 7.94 (m, 1H), 7.83 – 7.77 (m, 1H), 7.47 – 7.39 (m, 2H), 4.30 (s, 2H), 2.43 (s, 3H).

$^{13}\text{C}$  NMR (75 MHz, DMSO):  $\delta$  139.97, 139.09, 132.82, 130.16, 125.67, 124.87, 122.99, 122.94, 35.65, 12.10. Pale yellow solid.

#### TM5-195

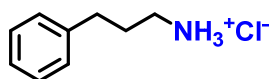

$^1\text{H}$  NMR (300 MHz, DMSO- $d_6$ ):  $\delta$  8.38 (br s, 3H), 7.45 – 6.99 (m, 5H), 2.89 – 2.56 (m, 4H), 1.99 – 1.87 (m, 2H).

$^{13}\text{C}$  NMR (75 MHz, DMSO):  $\delta$  141.35, 128.82, 128.71, 126.41, 38.79, 32.38, 29.10. Off-White solid.

#### TM5-211

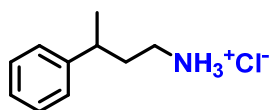

$^1\text{H}$  NMR (300 MHz, DMSO- $d_6$ ):  $\delta$  8.19 (br s, 3H), 7.39 – 7.09 (m, 5H), 2.94-2.78 (m,  $J = 7.1$  Hz, 1H), 2.74 – 2.59 (m, 1H), 2.56 – 2.46 (m, 1H), 2.00 – 1.79 (m, 2H), 1.19 (d,  $J = 6.9$  Hz, 3H).

$^{13}\text{C}$  NMR (75 MHz, DMSO):  $\delta$  146.30, 128.94, 127.25, 126.69, 37.79, 36.85, 35.45, 22.49. Off-White solid.

#### TM5-188

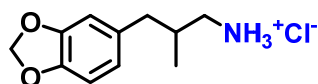

$^1\text{H}$  NMR (300 MHz, DMSO- $d_6$ ):  $\delta$  7.99 (br s, 3H), 6.81- 6.76 (m, 2H), 6.67 (dd,  $J = 8.0, 1.6$  Hz, 1H), 5.93 (s, 2H), 3.14 – 1.78 (m, 5H), 0.81 (d,  $J = 7.3$  Hz, 3H).

$^{13}\text{C}$  NMR (75 MHz, DMSO):  $\delta$  147.52, 145.80, 133.84, 122.40, 109.74, 108.44, 101.13, 44.30, 33.64, 17.28. Off-White solid.

#### TM5-247

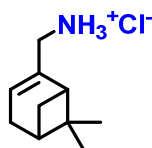

$^1\text{H}$  NMR (400 MHz, DMSO- $d_6$ ):  $\delta$  8.31 (br s, 3H), 5.59 (d,  $J = 3.1$  Hz, 1H), 3.34 (s, 2H), 2.56 – 1.91 (m, 6H), 1.25 (s, 3H), 0.79 (s, 3H).

$^{13}\text{C}$  NMR (101 MHz, DMSO):  $\delta$  141.41, 121.52, 43.66, 43.14, 38.10, 31.41, 31.23, 26.26, 21.30. Brown gum.

TM5-327

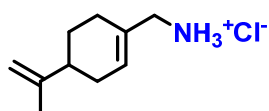

$^1\text{H NMR}$  (400 MHz, DMSO- $d_6$ ):  $\delta$  8.39 (br s, 3H), 5.94 – 5.60 (m, 1H), 4.71 (s, 2H), 3.29 (s, 2H), 2.21 – 2.01 (m, 4H), 1.71 (s, 3H), 1.56 – 1.51 (m, 2H).

$^{13}\text{C NMR}$  (101 MHz, DMSO):  $\delta$  149.31, 131.23, 125.94, 109.47, 48.98, 44.07, 30.29, 27.22, 27.01, 21.02. Colorless gum.

TM5-283

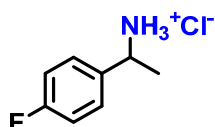

$^1\text{H NMR}$  (300 MHz, DMSO- $d_6$ ):  $\delta$  8.66 (br s, 3H), 7.74 – 7.55 (m, 2H), 7.38 – 6.97 (m, 2H), 4.40 (q,  $J$  = 6.7 Hz, 1H), 1.53 (d,  $J$  = 6.7 Hz, 3H).

$^{13}\text{C NMR}$  (75 MHz, DMSO- $d_6$ ):  $\delta$  162.34 (d,  $J$  = 244.3 Hz), 136.20 (d,  $J$  = 3.1 Hz), 129.72 (d,  $J$  = 8.3 Hz), 115.82 (d,  $J$  = 21.4 Hz), 49.83, 21.24. Pale Brown solid.

TM5-338

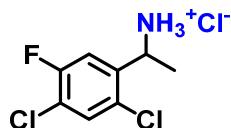

$^1\text{H NMR}$  (300 MHz, DMSO- $d_6$ ):  $\delta$  8.88 (br s, 3H), 8.16 (s, 2H), 4.65 (q,  $J$  = 6.7 Hz, 1H), 1.51 (d,  $J$  = 6.7 Hz, 3H).

$^{13}\text{C NMR}$  (75 MHz, DMSO):  $\delta$  156.81 (d,  $J$  = 243.2 Hz), 138.49 (d,  $J$  = 6.3 Hz), 131.71 (d,  $J$  = 19.4 Hz), 128.00 (d,  $J$  = 3.1 Hz), 120.91 (d,  $J$  = 18.6 Hz), 116.45 (d,  $J$  = 39.4 Hz), 47.29, 20.03. Brown solid.

TM5-337

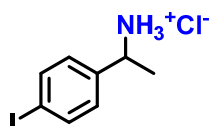

$^1\text{H NMR}$  (300 MHz, DMSO- $d_6$ ):  $\delta$  8.84 – 8.57 (br s, 3H), 7.75 (d,  $J$  = 7.9 Hz, 2H), 7.36 (d,  $J$  = 7.8 Hz, 2H), 4.34 (q,  $J$  = 5.9 Hz, 1H), 1.50 (d,  $J$  = 6.7 Hz, 3H).

$^{13}\text{C NMR}$  (75 MHz, DMSO):  $\delta$  139.47, 137.80, 129.78, 95.24, 50.09, 21.03. Brown solid.

**TM5-356**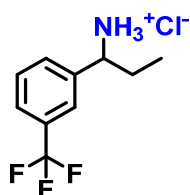

**<sup>1</sup>H NMR (300 MHz, DMSO-*d*<sub>6</sub>):** δ 8.83 (br s, 3H), 7.95 (d, *J* = 1.7 Hz, 1H), 7.87 (d, *J* = 7.5 Hz, 1H), 7.76 – 7.62 (m, 2H), 4.28 (dd, *J* = 9.2, 5.5 Hz, 1H), 2.30 – 1.61 (m, 2H), 0.73 (d, *J* = 7.4 Hz, 3H).

**<sup>13</sup>C NMR (75 MHz, DMSO-*d*<sub>6</sub>):** δ 139.52, 132.30, 130.19, 129.78 (q, *J* = 31.8 Hz), 125.50 (q, *J* = 2.1 Hz), 124.97 (q, *J* = 3.4 Hz), 124.50 (q, *J* = 272.2 Hz), 55.75, 27.76, 10.29. Brown solid.

**TM5-362**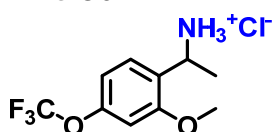

**<sup>1</sup>H NMR (300 MHz, DMSO-*d*<sub>6</sub>):** δ 8.74 (br s, 3H), δ 7.81 (d, *J* = 8.4 Hz, 1H), 7.19 – 6.86 (m, 2H), 4.61 – 4.53 (m, 1H), 3.87 (s, 3H), 1.50 (d, *J* = 6.7 Hz, 3H).

**<sup>13</sup>C NMR (75 MHz, DMSO):** δ 157.73, 149.44, 128.89, 126.94, 122.8 (q, *J* = 255.75 Hz), 112.81, 105.36, 56.75, 44.52, 19.63. Off-White solid.

**TM5-265**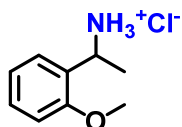

**<sup>1</sup>H NMR (300 MHz, DMSO-*d*<sub>6</sub>):** δ 7.82 (br s, 3H), 7.50 (dd, *J* = 7.6, 1.6 Hz, 1H), 7.35 – 7.25 (m, 1H), 7.04 – 6.91 (m, 2H), 4.53 (q, *J* = 6.7 Hz, 1H), 3.78 (s, 3H), 1.45 (d, *J* = 6.7 Hz, 3H).

**<sup>13</sup>C NMR (75 MHz, DMSO):** δ 156.39, 130.08, 127.29, 127.21, 120.99, 111.66, 56.15, 45.04, 19.87. White solid.

**TM5-202**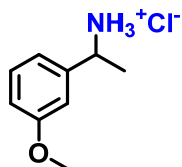

**<sup>1</sup>H NMR (400 MHz, DMSO-*d*<sub>6</sub>):** δ 8.77 (br s, 3H), 7.31 (s, 1H), 7.31–7.20 (d, *J* = 2.0 Hz, 1H), 7.14 – 7.04 (m, 1H), 6.91 (dd, *J* = 8.2, 2.4 Hz, 1H), 4.33 (q, *J* = 6.7 Hz, 1H), 1.52 (d, *J* = 6.6 Hz, 3H).

**<sup>13</sup>C NMR (101 MHz, DMSO):** δ 159.85, 141.54, 130.18, 119.36, 114.20, 113.05, 55.72, 50.50, 21.38. White solid.



TM5-289

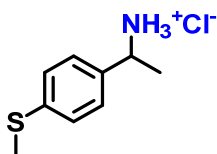

**<sup>1</sup>H NMR (300 MHz, DMSO-*d*<sub>6</sub>):** δ 8.61 (br s, 3H), 7.57 (d, *J* = 7.1 Hz, 2H), 7.36 ((d, *J* = 7.9 Hz, 2H)), 4.61 – 4.16 (m, 1H), 2.47 (s, 3H), 1.51 (d, *J* = 6.8 Hz, 3H).

**<sup>13</sup>C NMR (75 MHz, DMSO):** δ 138.95, 136.23, 127.97, 126.38, 49.01, 21.02, 15.06. Pale brown solid.

TM5-207

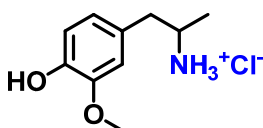

**<sup>1</sup>H NMR (300 MHz, DMSO-*d*<sub>6</sub>):** δ 10.05 (br s, 1H), 8.44 (br s, 3H), 6.88 – 6.80 (m, 2H), 6.66 (dd, *J* = 8.1, 1.9 Hz, 1H), 4.03-3.96 (m, 1H), 3.79 (s, 3H), 3.01 (dd, *J* = 13.4, 5.1 Hz, 1H), 2.64 (dd, *J* = 13.3, 8.9 Hz, 1H), 1.18 (d, *J* = 6.5 Hz, 3H).

**<sup>13</sup>C NMR (75 MHz, DMSO):** δ 147.98, 145.75, 127.90, 121.93, 115.95, 113.75, 56.03, 48.80, 40.63, 17.97. White solid.

TM5-301

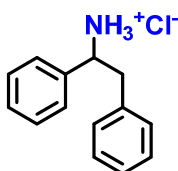

**<sup>1</sup>H NMR (400 MHz, DMSO-*d*<sub>6</sub>):** δ 8.11 (br s, 3H), 7.47-7.40 (m, 2H), 7.33 – 7.24 (m, 3H), 7.19 – 6.95 (m, 5H), 4.46 (t, *J* = 7.7 Hz, 1H), 3.57 – 3.41 (m, 1H), 3.13-3.03 (m, 1H).

**<sup>13</sup>C NMR (101 MHz, DMSO):** δ 137.45, 136.73, 129.67, 128.87, 128.83, 128.69, 128.42, 127.01, 56.44, 42.57. Pale Yellow solid.

TM5-346

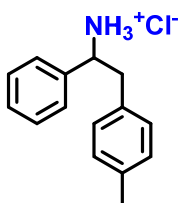

**<sup>1</sup>H NMR (300 MHz, DMSO-*d*<sub>6</sub>):** δ 8.10 (br s, 3H), 7.35-7.29 (m, 2H), 7.24-7.19 (m, 2H), 6.97 – 6.78 (m, 5H), 4.36 (dd, *J* = 10.5, 4.7 Hz, 1H), 3.34 (dd, *J* = 13.3, 4.8 Hz, 1H), 3.09 – 2.88 (m, 1H), 2.11 (s, 3H).

**<sup>13</sup>C NMR (75 MHz, DMSO):** δ 137.21, 135.96, 133.44, 129.47, 129.26, 128.92, 128.85, 128.36, 56.39, 40.46, 21.05. Off-White solid.

### TM5-300

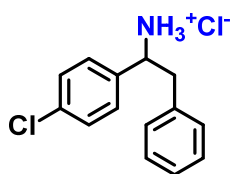

$^1\text{H NMR}$  (300 MHz,  $\text{DMSO-}d_6$ ):  $\delta$  9.02 (br s, 3H), 7.51 (d,  $J = 8.1$  Hz, 2H), 7.38 (d,  $J = 8.1$  Hz, 2H), 7.20 – 7.13 (m, 3H), 7.10 – 6.98 (m, 2H), 4.52 (t,  $J = 7.3$  Hz, 1H), 3.64 – 3.31 (m, 2H).

$^{13}\text{C NMR}$  (75 MHz,  $\text{DMSO}$ ):  $\delta$  136.54, 136.52, 133.52, 130.44, 129.70, 128.82, 128.77, 127.11, 55.63, 40.50. Pale yellow solid.

### TM5-294

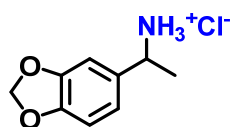

$^1\text{H NMR}$  (400 MHz,  $\text{DMSO-}d_6$ ):  $\delta$  8.56 (br s, 3H), 7.46 (d,  $J = 1.7$  Hz, 1H), 7.1 (dd,  $J = 8.1, 1.7$  Hz, 1H), 6.95 (d,  $J = 8.0$  Hz, 1H), 6.21 (s, 2H), 4.29 (q,  $J = 6.1$  Hz, 1H), 1.48 (d,  $J = 6.8$  Hz, 3H).

$^{13}\text{C NMR}$  (101 MHz,  $\text{DMSO}$ ):  $\delta$  147.82, 147.55, 133.49, 121.12, 108.68, 107.76, 101.65, 50.40, 21.19. Off-White solid.

### TM5-279

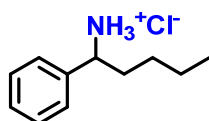

$^1\text{H NMR}$  (300 MHz,  $\text{DMSO-}d_6$ ):  $\delta$  8.77 (br s, 3H), 7.64 – 7.50 (m, 2H), 7.39 – 7.29 (m, 3H), 4.35 – 3.93 (m, 1H), 2.24 – 1.63 (m, 2H), 1.40 – 0.89 (m, 4H), 0.78 (t,  $J = 7.0$  Hz, 3H).

$^{13}\text{C NMR}$  (75 MHz,  $\text{DMSO}$ ):  $\delta$  138.53, 129.07, 128.83, 128.03, 55.00, 34.38, 27.67, 22.12, 14.19. Off-White solid.

### TM5-413

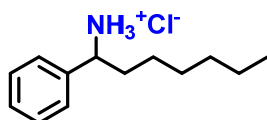

$^1\text{H NMR}$  (400 MHz,  $\text{DMSO-}d_6$ ):  $\delta$  8.41 (br s, 3H), 7.53 – 7.32 (m, 5H), 4.20–4.14 (t, 1H), 2.01–2.65 (m, 2H), 1.33 – 0.94 (m, 8H), 0.90 – 0.62 (m, 3H).

$^{13}\text{C NMR}$  (101 MHz,  $\text{DMSO}$ ):  $\delta$  138.32, 129.22, 129.04, 127.82, 54.91, 34.65, 31.41, 28.54, 25.41, 22.36, 14.34. Off-white solid.

**TM5-298**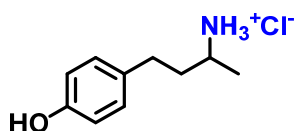

**<sup>1</sup>H NMR (400 MHz, DMSO-*d*<sub>6</sub>):** δ 9.30 (br s, 1H), 8.22 (br s, 3H), 7.01(d, *J* = 8.4 Hz, 2H), 6.75 (d, *J* = 8.4 Hz, 2H), 3.08 (dt, *J* = 12.2, 6.1 Hz, 1H), 2.59 – 2.46 (m, 2H), 1.96 – 1.83 (m, 1H), 1.71–1.64 (m, 1H), 1.22 (d, *J* = 6.5 Hz, 3H).

**<sup>13</sup>C NMR (101 MHz, DMSO):** δ 156.03, 131.30, 129.46, 115.65, 46.86, 36.62, 30.47, 18.46. Off-White solid.

**TM5-342**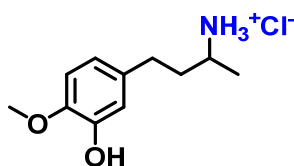

**<sup>1</sup>H NMR (300 MHz, DMSO-*d*<sub>6</sub>):** δ 8.82 (br s, 1H), 8.26 (br s, 3H), 7.01 – 6.35 (m, 3H), 3.74 (s, 3H), 3.08 – 2.99 (m, 1H), 2.62 – 2.42 (m, 2H), 2.29 – 1.56 (m, 2H), 1.23 (d, *J* = 6.3 Hz, 3H). **<sup>13</sup>C NMR (75 MHz, DMSO):** δ 147.92, 145.15, 132.12, 120.73, 115.86, 112.99, 56.09, 46.89, 36.49, 30.87, 18.48. Off-White solid.

**TM5-274 (Diastereomeric mixture)**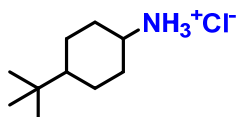

**<sup>1</sup>H NMR (300 MHz, DMSO-*d*<sub>6</sub>):** δ 8.18 (br s, 3H), 3.21 – 2.76 (m, 1H), 2.08 – 1.82 (m, 2H), 1.74 – 1.65 (m, 1H), 1.56 – 1.23 (m, 4H), 1.03 – 0.83 (m, 2H), 0.78 (s, 9H).

**<sup>13</sup>C NMR (75 MHz, DMSO):** δ 50.05, 47.47, 46.68, 46.15, 32.71, 32.42, 30.81, 28.86, 27.91, 27.79, 25.38, 20.71. White solid.

**TM5-206**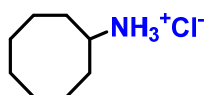

**<sup>1</sup>H NMR (400 MHz, DMSO-*d*<sub>6</sub>):** δ 8.21 (br s, 3H), 3.23 – 2.97 (m, 1H), 1.91- 1.84 (m, 2H), 1.63- 1.58 (m, 4H), 1.49-1.36 (m, 8H).

**<sup>13</sup>C NMR (101 MHz, DMSO):** δ 51.36, 30.30, 26.72, 25.30, 23.30. Brown solid.

### TM5-306

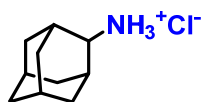

$^1\text{H NMR}$  (300 MHz, DMSO- $d_6$ ):  $\delta$  8.40 (br s, 3H), 3.64 – 3.48 (m, 1H), 2.24 – 1.95 (m, 4H), 1.90 – 1.61 (m, 8H), 1.51 (d,  $J$  = 13.3 Hz, 2H).

$^{13}\text{C NMR}$  (75 MHz, DMSO):  $\delta$  55.18, 37.34, 36.64, 30.38, 29.97, 26.90, 26.82. White solid.

### TM5-282

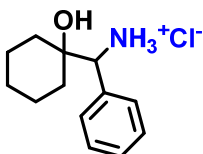

$^1\text{H NMR}$  (300 MHz, DMSO- $d_6$ ):  $\delta$  8.35 (br s, 3H), 7.41–7.33 (m,  $J$  = 7.2, 2.6 Hz, 2H), 7.40 – 7.32 (m, 3H), 5.03 (s, 1H), 4.11 (s, 1H), 1.85 – 1.65 (m, 1H), 1.64 – 1.40 (m, 4H), 1.38 – 0.97 (m, 5H).

$^{13}\text{C NMR}$  (75 MHz, DMSO):  $\delta$  135.84, 129.42, 128.58, 128.33, 71.25, 63.31, 34.85, 32.98, 25.47, 21.47, 21.12. Brown solid.

### TM5-287

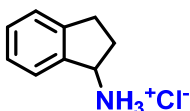

$^1\text{H NMR}$  (300 MHz, DMSO- $d_6$ ):  $\delta$  8.50 (br s, 3H), 7.61 (d,  $J$  = 7.1 Hz, 1H), 7.31 – 7.29 (m, 3H), 4.70 (dd,  $J$  = 8.5, 4.3 Hz, 1H), 3.07 – 2.99 (m, 1H), 2.87 – 2.79 (m, 1H), 2.44 – 2.31 (m, 1H), 2.06 – 1.93 (m, 1H).

$^{13}\text{C NMR}$  (75 MHz, DMSO):  $\delta$  144.39, 139.71, 129.44, 127.11, 125.38, 125.37, 55.12, 30.73, 30.27. Off-White solid.

### TM5-415

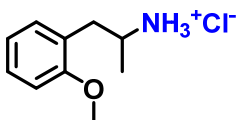

$^1\text{H NMR}$  (400 MHz, DMSO- $d_6$ ):  $\delta$  8.38 – 8.08 (br s, 3H), 7.38 – 7.07 (m, 2H), 7.05 – 6.74 (m, 2H), 3.78 (s, 3H), 3.51 – 3.24 (m, 1H), 3.01 (dd,  $J$  = 13.1, 5.1 Hz, 1H), 2.70 (dd,  $J$  = 13.1, 9.2 Hz, 1H), 1.09 (d,  $J$  = 6.5 Hz, 3H).

$^{13}\text{C NMR}$  (101 MHz, DMSO):  $\delta$  157.72, 131.36, 128.82, 125.04, 120.84, 111.36, 55.79, 47.15, 35.32, 18.10. White solid.

**TM-416**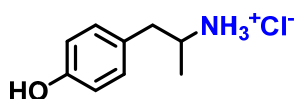

**<sup>1</sup>H NMR (400 MHz, DMSO-*d*<sub>6</sub>):** δ 8.27 (br s, 3H), 7.18 (d, *J* = 8.5 Hz, 2H), 6.88 (d, *J* = 8.6 Hz, 2H), 3.40 – 3.17 (m, 1H), 3.01 (dd, *J* = 13.4, 4.9 Hz, 1H), 2.75 – 2.59 (m, 1H), 1.16 (d, *J* = 6.4 Hz, 3H).

**<sup>13</sup>C NMR (101 MHz, DMSO):** δ 156.65, 130.57, 127.18, 115.83, 66.80, 48.79, 17.83. Off-white solid.

**TM5-207**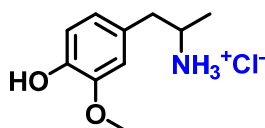

**<sup>1</sup>H NMR (300 MHz, DMSO-*d*<sub>6</sub>):** δ 10.05 (br s, 1H), 8.44 (br s, 3H), 6.88 (d, *J* = 8.0 Hz, 2H), 6.66 (dd, *J* = 8.1, 1.9 Hz, 1H), 4.03-3.96 (m, 1H), 3.79 (s, 3H), 3.01 (dd, *J* = 13.4, 5.1 Hz, 1H), 2.64 (dd, *J* = 13.3, 8.9 Hz, 1H), 1.18 (d, *J* = 6.5 Hz, 3H).

**<sup>13</sup>C NMR (75 MHz, DMSO):** δ 147.98, 145.75, 127.90, 121.93, 115.95, 113.75, 56.03, 48.80, 40.63, 17.97. White solid.

**TM-414**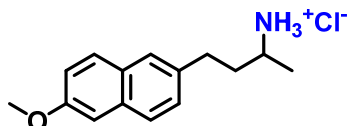

**<sup>1</sup>H NMR (400 MHz, DMSO-*d*<sub>6</sub>):** δ 8.31 (br s, 3H), 7.81 (m, 3H), 7.45 – 6.96 (m, 3H), 3.82 (s, 3H), 3.30 – 3.00 (m, 1H), 2.93 – 2.63 (m, 2H), 2.18 – 1.63 (m, 2H), 1.28 (d, *J* = 6.5 Hz, 3H).

**<sup>13</sup>C NMR (101 MHz, DMSO):** δ 157.25, 136.54, 133.26, 129.26, 129.01, 128.02, 127.32, 126.40, 118.99, 106.22, 55.59, 47.03, 36.20, 31.28, 18.49. White solid.

**TM5-427**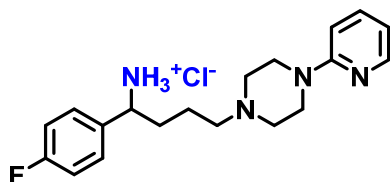

**<sup>1</sup>H NMR (400 MHz, DMSO-*d*<sub>6</sub>):** δ 8.80 (br s, 3H), 8.14 (d, *J* = 6.6 Hz, 2H), 7.76 (d, *J* = 5.3 Hz, 2H), 7.56 (d, *J* = 9.2 Hz, 1H), 7.32 (t, *J* = 8.7 Hz, 2H), 7.14 (d, *J* = 6.6 Hz, 1H), 4.74 – 4.57 (m, 2H), 4.46 – 4.33 (m, 1H), 3.90 – 3.52 (m, 4H), 3.39 – 3.18 (m, 4H), 2.16-2.05 (m, 1H), 1.99-1.87 (m, 1H), 1.82-1.73 (m, 1H), 1.67-1.55 (m, 1H).

**<sup>13</sup>C NMR (101 MHz, DMSO):** 162.45 (d, *J* = 246.7 Hz), 152.41, 144.56, 138.10, 134.51 (d, *J* = 2.9 Hz), 130.44 (d, *J* = 8.2 Hz), 115.91 (d, *J* = 21.2 Hz), 114.38, 113.24, 54.96, 53.51, 50.12, 43.79, 31.73, 19.90. Pale-yellow solid.

#### TM5-428

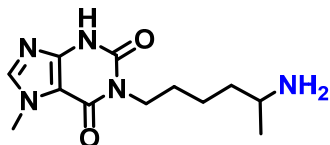

**<sup>1</sup>H NMR (300 MHz, Methanol-*d*<sub>4</sub>):**  $\delta$  8.07 (s, 1H), 3.92 (s, 3H), 3.91 – 3.85 (m, 2H), 3.22 (d, *J* = 13.4 Hz, 1H), 1.69 – 1.51 (m, 4H), 1.36 (p, *J* = 7.9 Hz, 2H), 1.23 (d, *J* = 6.5 Hz, 3H).

**<sup>13</sup>C NMR (75 MHz, MeOD):**  $\delta$  154.84, 151.28, 146.82, 141.62, 107.36, 40.57, 33.92, 33.22, 29.19, 27.14, 22.31, 17.34. Off-white solid.

#### TM5-307 (diastereomeric mixture)

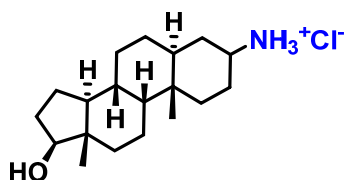

**<sup>1</sup>H NMR (300 MHz, DMSO-*d*<sub>6</sub>):**  $\delta$  8.13 (br s, 3H), 3.48 – 3.15 (m, 2H), 2.09 – 0.99 (m, 22H), 0.89 – 0.66 (m, 3H), 0.67 – 0.35 (m, 3H). **<sup>13</sup>C NMR (75 MHz, DMSO-*d*<sub>6</sub>):**  $\delta$  80.48, 53.63, 51.17, 46.69, 43.01, 38.40, 37.10, 35.98, 35.49, 31.59, 31.26, 30.97, 30.29, 28.22, 24.28, 23.50, 20.40, 11.79, 11.55. White solid.

#### TM5-363 (diastereomeric mixture)

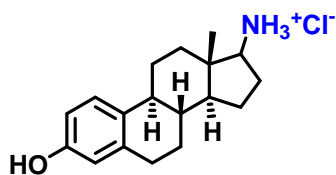

**<sup>1</sup>H NMR (300 MHz, DMSO-*d*<sub>6</sub>):**  $\delta$  8.14 (br s, 3H), 7.05 (d, *J* = 8.0 Hz, 1H), 6.65 – 6.25 (m, 2H), 3.22–2.71 (m, 3H), 2.45–2.05 (m, 3H), 1.87 – 1.12 (m, 10H), 0.76 (d, *J* = 4.4 Hz, 3H).

**<sup>13</sup>C NMR (101 MHz, DMSO):**  $\delta$  155.58, 155.56, 137.46, 137.44, 130.41, 130.29, 126.57, 126.48, 115.47, 115.46, 113.32, 113.29, 59.98, 59.26, 51.30, 47.95, 43.90, 43.59, 43.29, 42.52, 38.75, 38.70, 36.26, 32.41, 29.67, 29.56, 28.40, 28.28, 27.53, 26.73, 26.21, 26.13, 24.69, 23.57, 18.36, 12.18. White solid.

### TM5-311 (diastereomeric mixture)

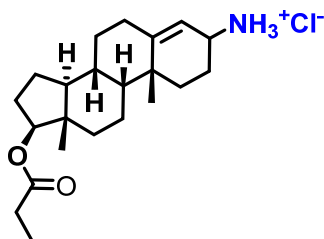

<sup>1</sup>H NMR (300 MHz, DMSO-*d*<sub>6</sub>): δ 7.52 (br s, 3H), 5.26–5.19 (m, 1H), 4.48 (dd, *J* = 9.1, 7.6 Hz, 1H), 3.62–3.53 (m, 2H), 2.36 – 1.18 (m, 17H), 1.09 – 0.89 (m, 8H), 0.67 (t, *J* = 34.4 Hz, 3H), 0.63–0.59 (m, 1H).

<sup>13</sup>C NMR (75 MHz, DMSO): δ 174.07, 149.61, 117.36, 82.11, 53.97, 50.13, 47.73, 42.59, 37.14, 35.46, 32.37, 31.99, 29.09, 27.50, 24.21, 23.49, 20.58, 18.93, 12.31, 9.61. HRMS (ESI): Calcd for C<sub>22</sub>H<sub>35</sub>O<sub>2</sub>N<sub>2</sub> [M]<sup>+</sup> 345.26601; found 345.26632. Off-white solid.

### TM5-493

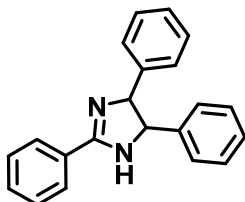

<sup>1</sup>H NMR (300 MHz, DMSO-*d*<sub>6</sub>): δ 8.13–8.01 (m, 2H), 7.60 – 7.42 (m, 4H), 7.09 – 6.92 (m, 10H), 5.45 (s, 2H).

<sup>13</sup>C NMR (75 MHz, DMSO): δ 164.25, 140.51, 131.08, 130.79, 128.84, 128.02, 127.91, 127.71, 126.69, 70.03. HRMS (ESI): Calcd for C<sub>21</sub>H<sub>18</sub>N<sub>2</sub> [M]<sup>+</sup> 298.14657; found 298.14645. Pale yellow gum.

### AAS analysis of purified benzylamine to determine Ru content

Dateiname 18062102

Instrument: contrAA 800D # Tech: Flamme

SW-Version: ASpect CS 2.2.1.0 Created: 21.06.2018 10:32

| Datum      | Zeit  | Name(2)    | Linie | Konz.2         | Einheit | Ext.  |
|------------|-------|------------|-------|----------------|---------|-------|
| 21.06.2018 | 10:18 | Thiru TM 5 | Ru349 | Messwert 0.000 | M- %    | 0.000 |
| 21.06.2018 | 10:19 | Thiru TM 5 | Ru349 | Ru n.n.        | M- %    | 0.000 |

*AAS measurement for the detection of metal content in the isolated and purified amine product.*

## Supplementary Figures

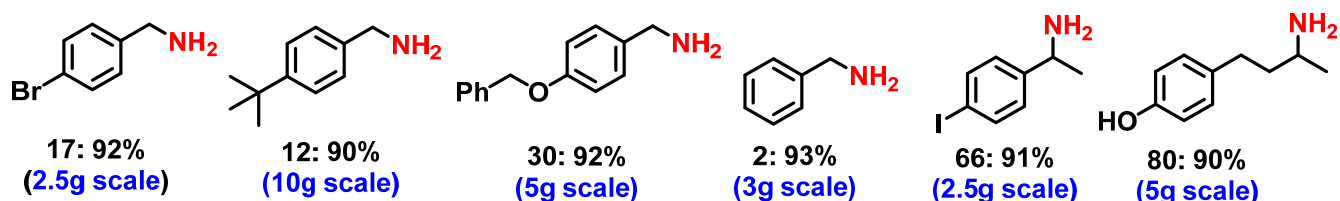

### Supplementary Figure 1. Demonstrating the synthetic utility for gram-scale reactions.

Reaction conditions: 2-20 g carbonyl compound, 2-3 mol% of  $\text{RuCl}_2(\text{PPh}_3)_3$  (2 mol% in case of aldehyde, 3 mol% in case of ketone), 5-7 bar  $\text{NH}_3$ , 40 bar  $\text{H}_2$ , 25-150 mL *t*-amyl alcohol, 130 °C, 24-30 h. Isolated as free amines and converted to hydrochloride salts. Corresponding hydrochloride salts were subjected to NMR analysis.

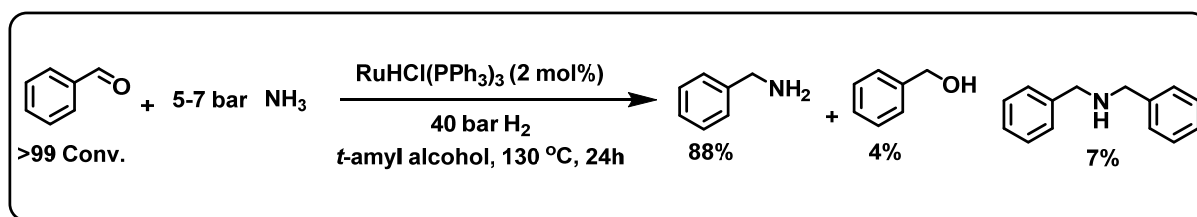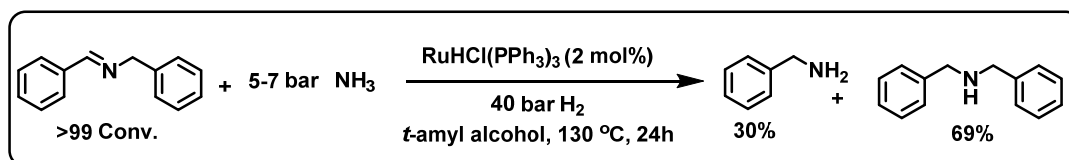

### Supplementary Figure 2. Reductive amination of benzaldehyde and N-benzylidenebenzylamine using $\text{RuHCl}(\text{PPh}_3)_3$ .

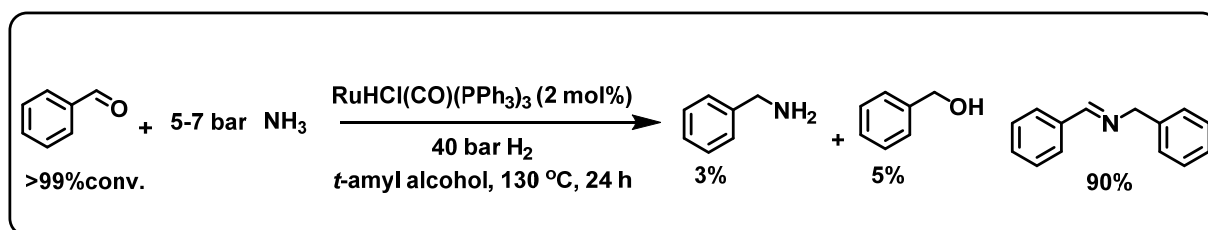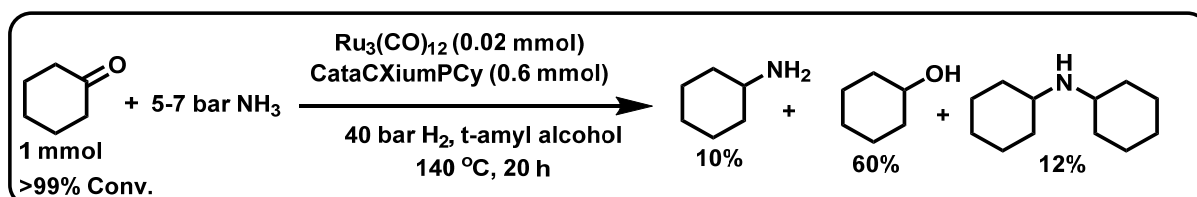



**Supplementary Figure 3.** Reductive amination of benzaldehyde using  $\text{RuHCl}(\text{CO})(\text{PPh}_3)_3$  and cyclohexanone using  $\text{Ru}_3(\text{CO})_{12}/\text{CataCxiuPCy}$ .

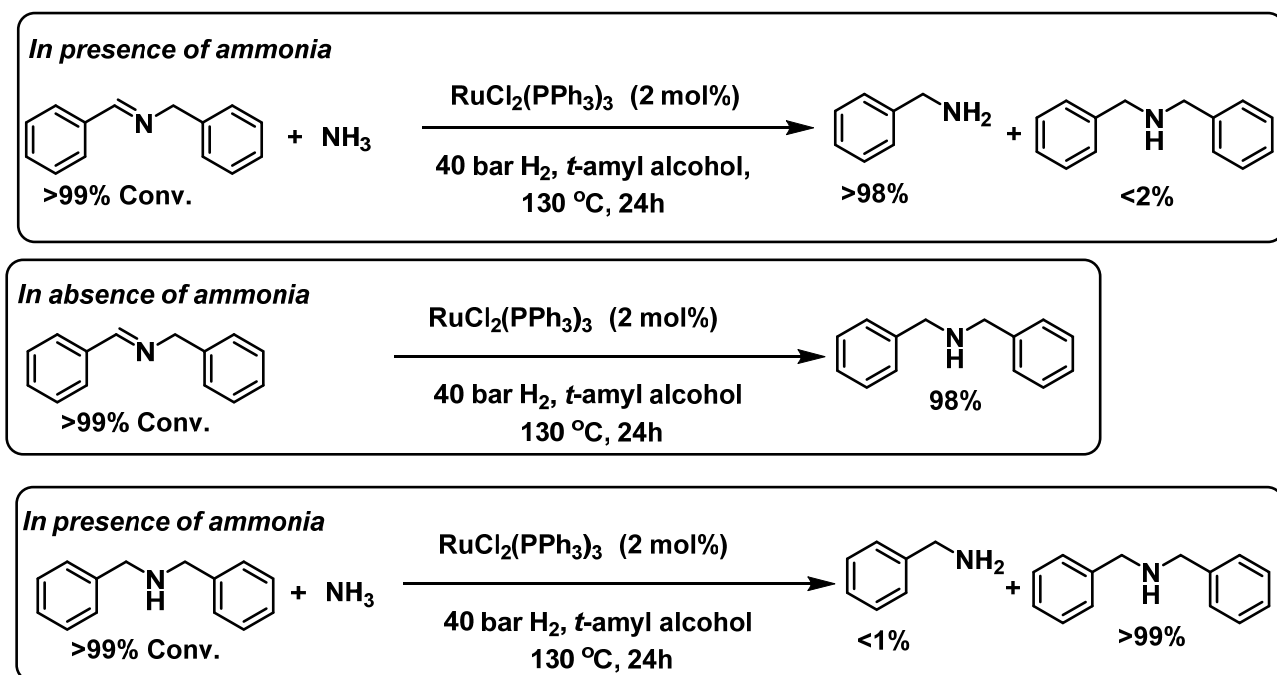

**Supplementary Figure 4.** Reaction of *N*-benzylidenebenzylamine and dibenzylamine in presence and absence of ammonia with  $\text{RuCl}_2(\text{PPh}_3)_3$  and hydrogen.

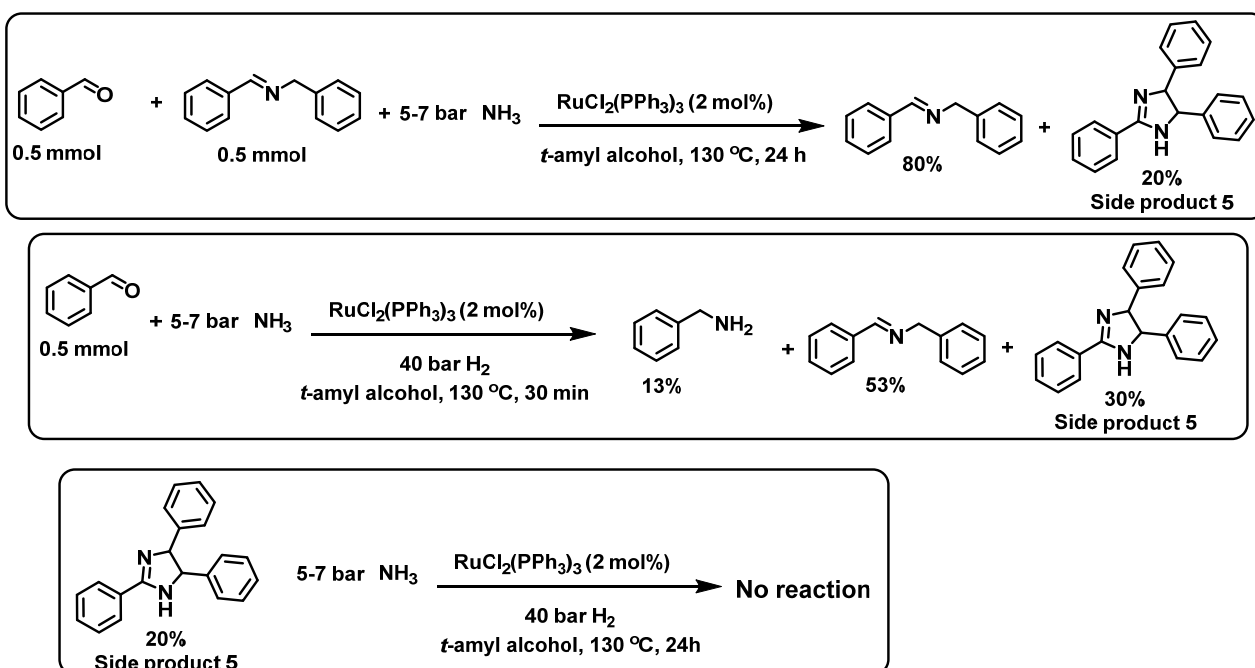

**Supplementary Figure 5.** Controll reactions to confirm the formation of side product 5.

180116.40a.201.hid  
Rajenahally, TM-5-522  
start (argon atmosphere)

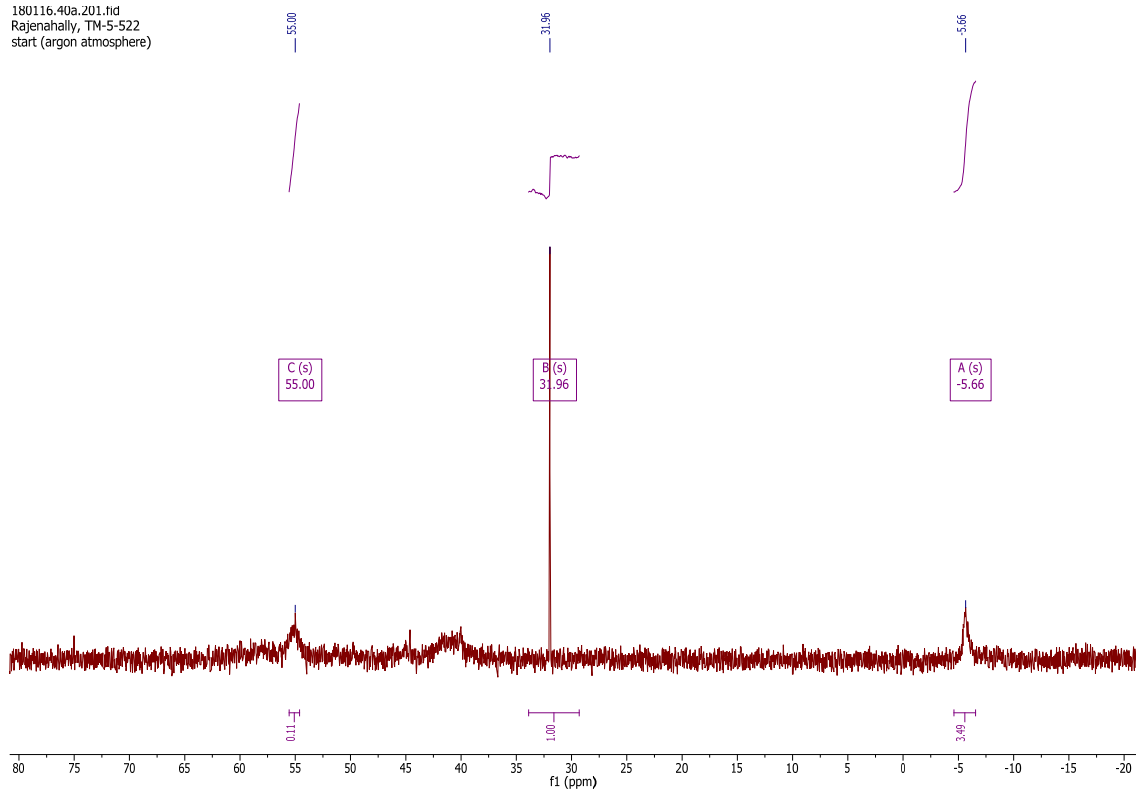

**Supplementary Figure 6.**  $^{31}\text{P}\{^1\text{H}\}$  NMR (162 MHz, -20 to 80 ppm) of  $\text{RuCl}_2(\text{PPh}_3)_3$  in methanol,  $\text{C}_6\text{D}_6$  at RT, argon atmosphere.

180116.40a.202.hid  
Rajenahally, TM-5-522  
start (H2 atmosphere)

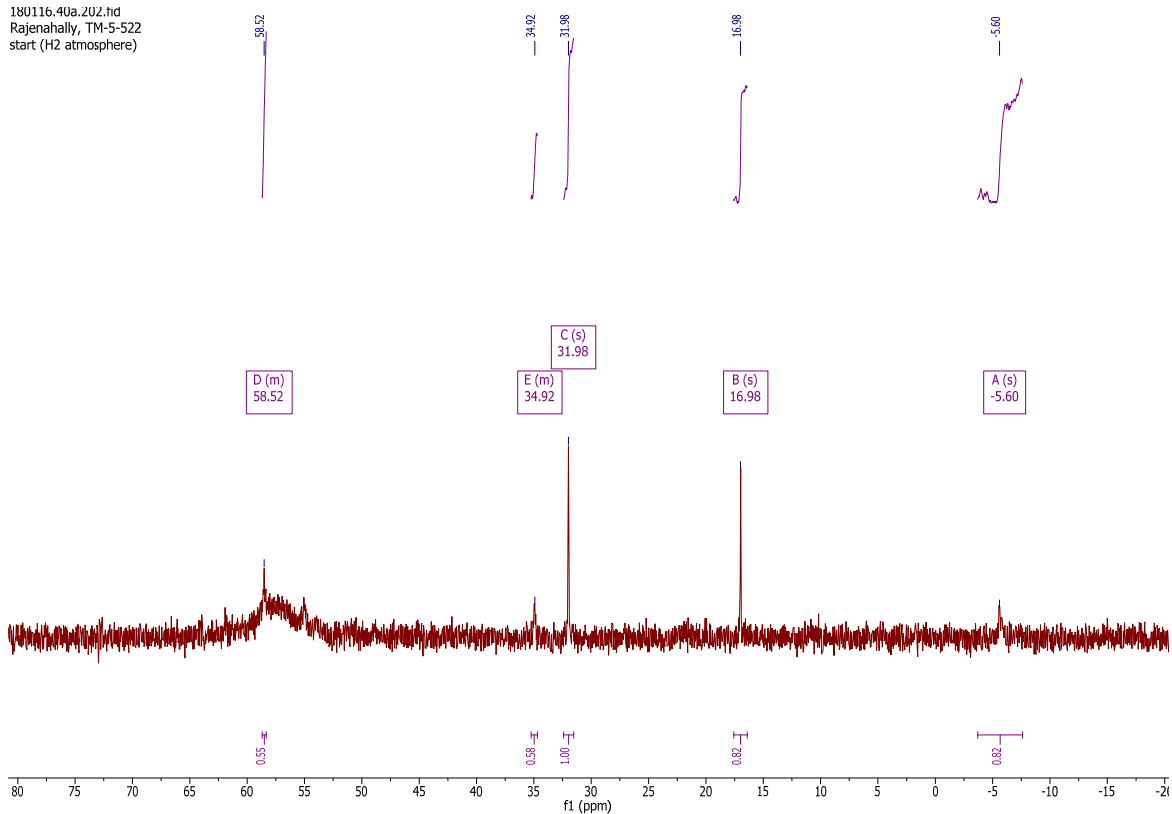

**Supplementary Figure 7.**  $^{31}\text{P}\{^1\text{H}\}$  NMR (162 MHz, -20 to 80 ppm) of  $\text{RuCl}_2(\text{PPh}_3)_3$  in methanol,  $\text{C}_6\text{D}_6$  at RT,  $\text{H}_2$  atmosphere (1.5 bar), 10 min.

180116.40a.204.fid  
Rajenahally, TM-5-522  
(H<sub>2</sub> atmosphere)  
gas flow blocked

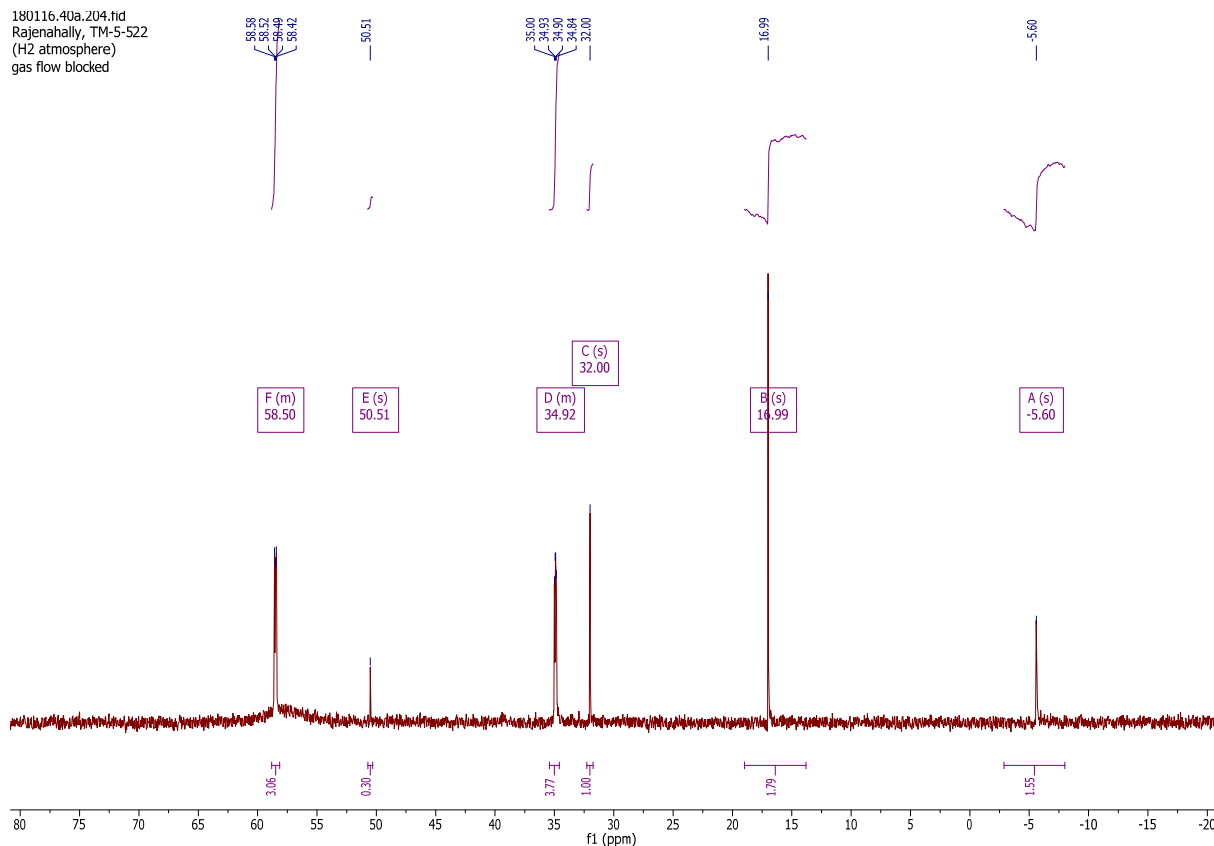

**Supplementary Figure 8.**  $^{31}\text{P}\{^1\text{H}\}$  NMR (162 MHz, -20 to 80 ppm) of  $\text{RuCl}_2(\text{PPh}_3)_3$  in methanol,  $\text{C}_6\text{D}_6$  at RT,  $\text{H}_2$  atmosphere (1.5 bar), 2.5h.

180116.40a.205.fid  
Rajenahally, TM-5-522  
333 K (H<sub>2</sub> atmosphere)

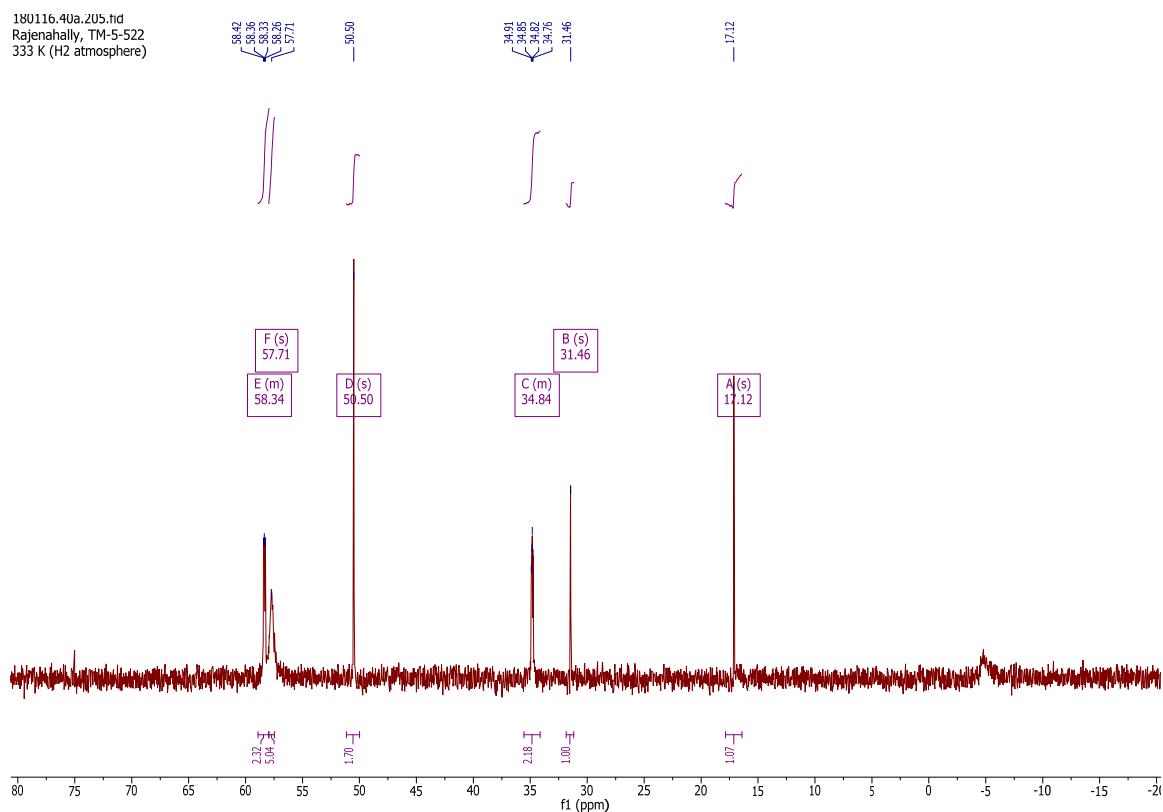

**Supplementary Figure 9.**  $^{31}\text{P}\{^1\text{H}\}$  NMR (162 MHz, -20 to 80 ppm) of  $\text{RuCl}_2(\text{PPh}_3)_3$  in methanol,  $\text{C}_6\text{D}_6$  at 60°C,  $\text{H}_2$  atmosphere (1.5 bar), 30 min.

180116.40a.208.hd  
Rajenahally, TM-5-522  
333 K (H2 atmosphere)

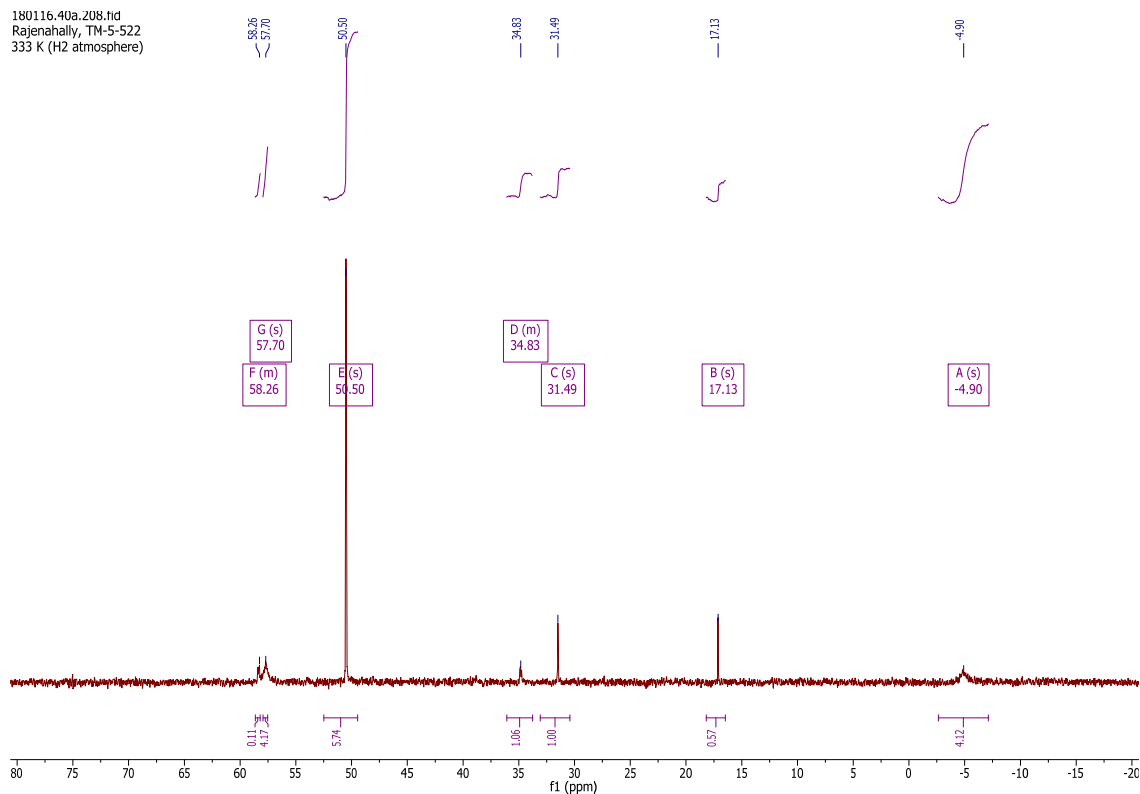

**Supplementary Figure 10.**  $^{31}\text{P}\{^1\text{H}\}$  NMR (162 MHz, -20 to 80 ppm) of  $\text{RuCl}_2(\text{PPh}_3)_3$  in methanol,  $\text{C}_6\text{D}_6$  at  $60^\circ\text{C}$ ,  $\text{H}_2$  atmosphere (1.5 bar), 2.5h.

180116.40a.207.hd  
Rajenahally, TM-5-522  
333 K (H2 atmosphere)

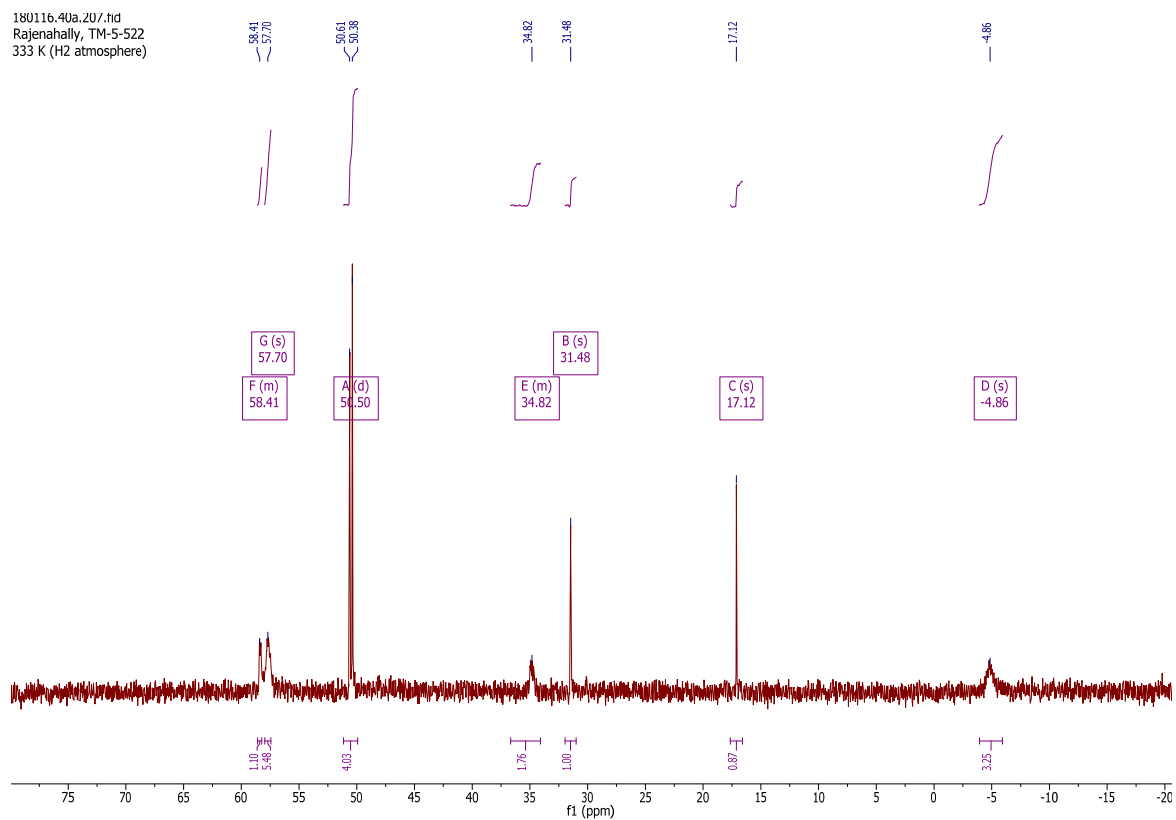

**Supplementary Figure 11.**  $^{31}\text{P}\{^1\text{H}\}$  NMR (162 MHz, -20 to 80 ppm) of  $\text{RuCl}_2(\text{PPh}_3)_3$  in methanol,  $\text{C}_6\text{D}_6$  at  $60^\circ\text{C}$ ,  $\text{H}_2$  atmosphere (1.5 bar), 1.5h, decoupled with reduced power (only aromatic protons are decoupled).

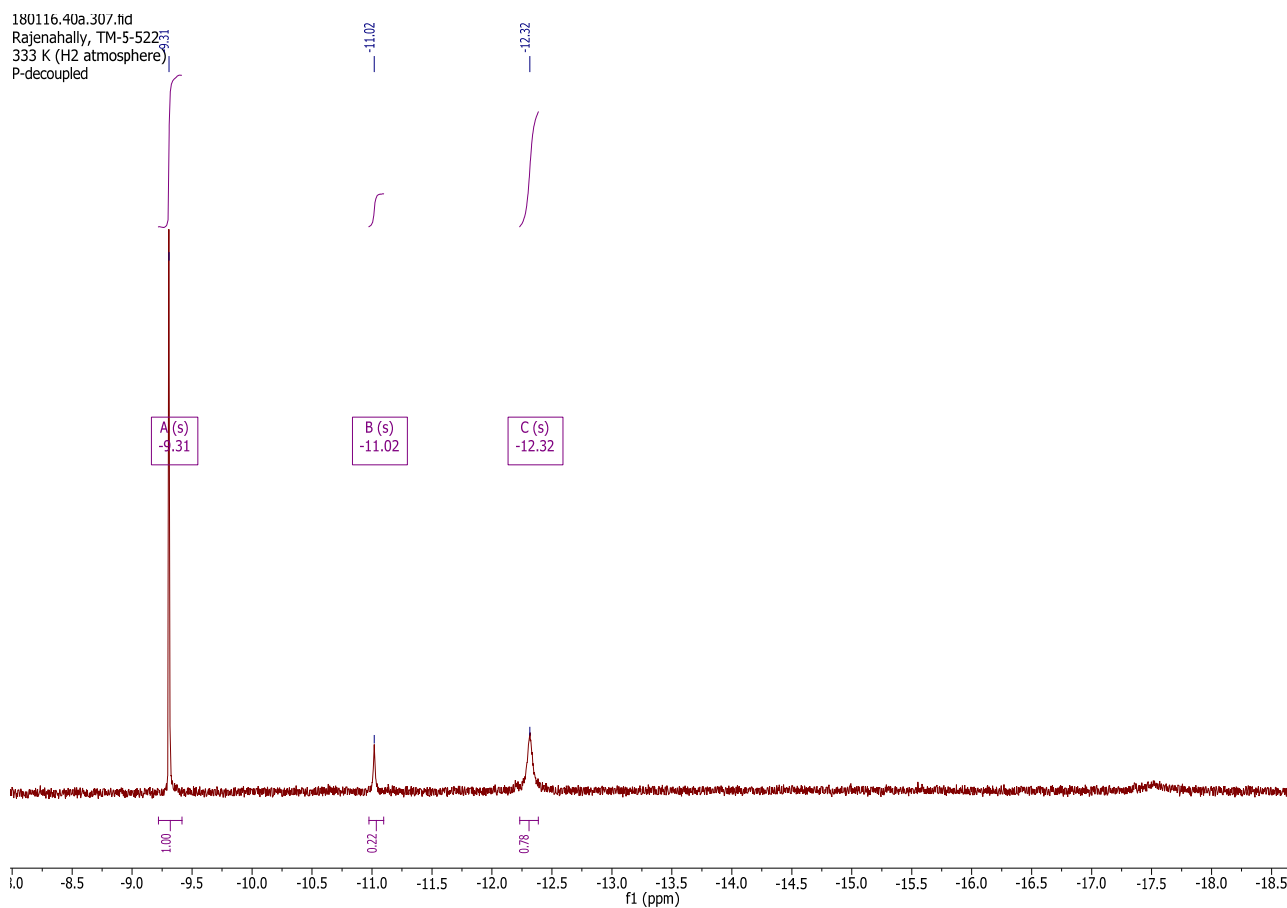

**Supplementary Figure 12.**  $^1\text{H}\{^{31}\text{P}\}$  NMR (400 MHz, -18 to -8 ppm) of  $\text{RuCl}_2(\text{PPh}_3)_3$  in methanol,  $\text{C}_6\text{D}_6$  at  $60^\circ\text{C}$ ,  $\text{H}_2$  atmosphere (1.5 bar), 1.5h.

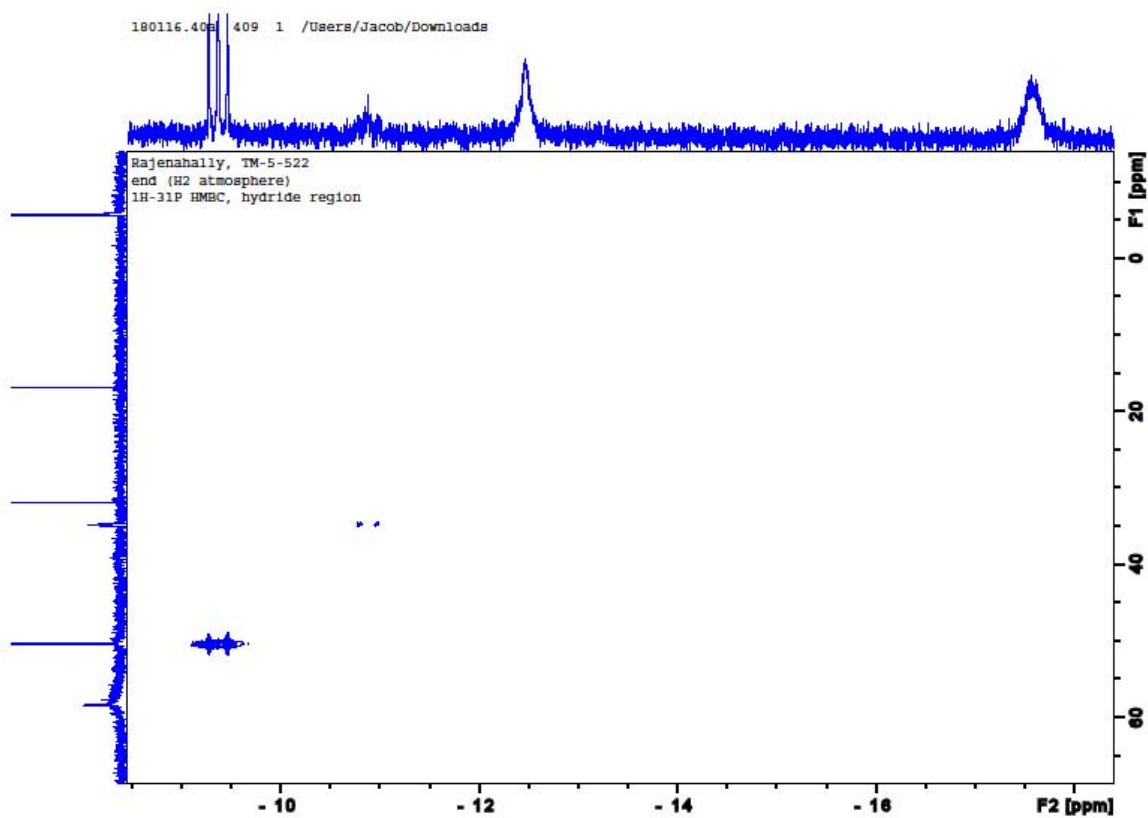

**Supplementary Figure 13.**  $^1\text{H}$ - $^{31}\text{P}$  HMBC NMR (400 MHz for  $^1\text{H}$ ) of  $\text{RuCl}_2(\text{PPh}_3)_3$  in methanol,  $\text{C}_6\text{D}_6$  after 2.5h at  $60^\circ\text{C}$  under  $\text{H}_2$  atmosphere (1.5 bar), measured at RT under  $\text{H}_2$  atmosphere.

171004.f319.10.fid  
Thiru TM5-252  
PROTON DMSO {C:\Bruker\TopSpin3.5pl6} 1710 19

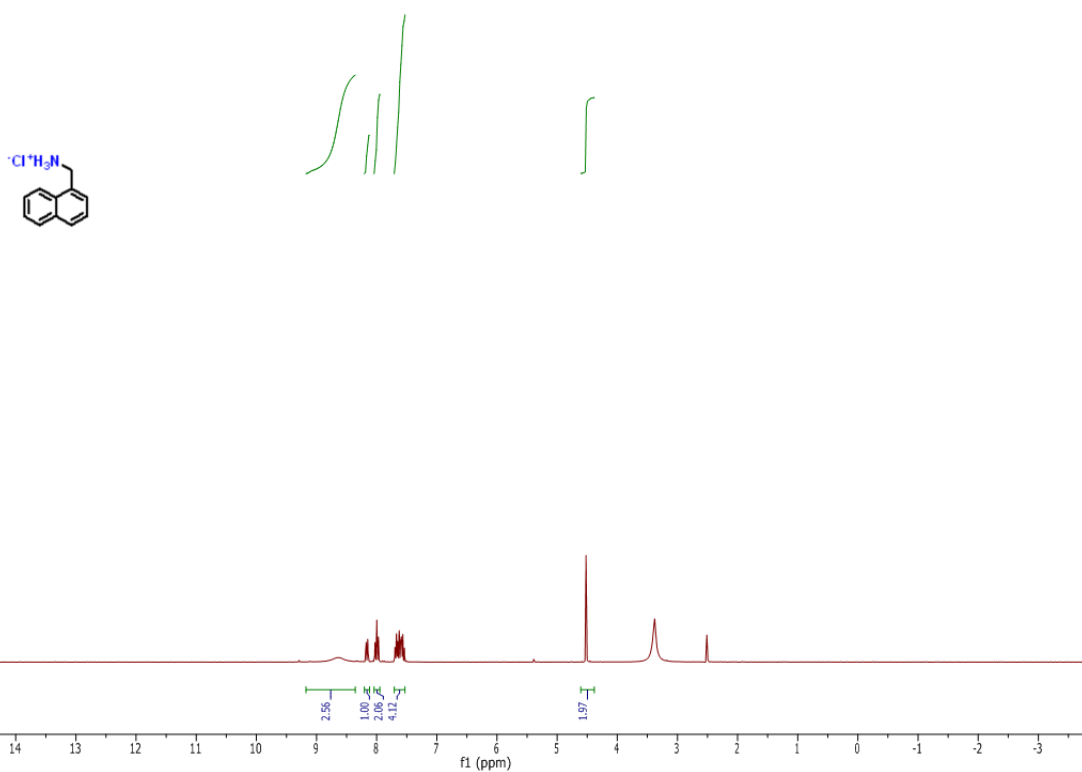

Supplementary Figure 14. <sup>1</sup>H NMR spectrum

171004.f319.11.fid  
Thiru TM5-252  
C13CPD DMSO {C:\Bruker\TopSpin3.5pl6} 1710 19

133.67  
133.45  
130.45  
129.88  
129.10  
127.74  
127.21  
126.82  
126.82  
123.93

40.81

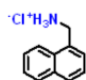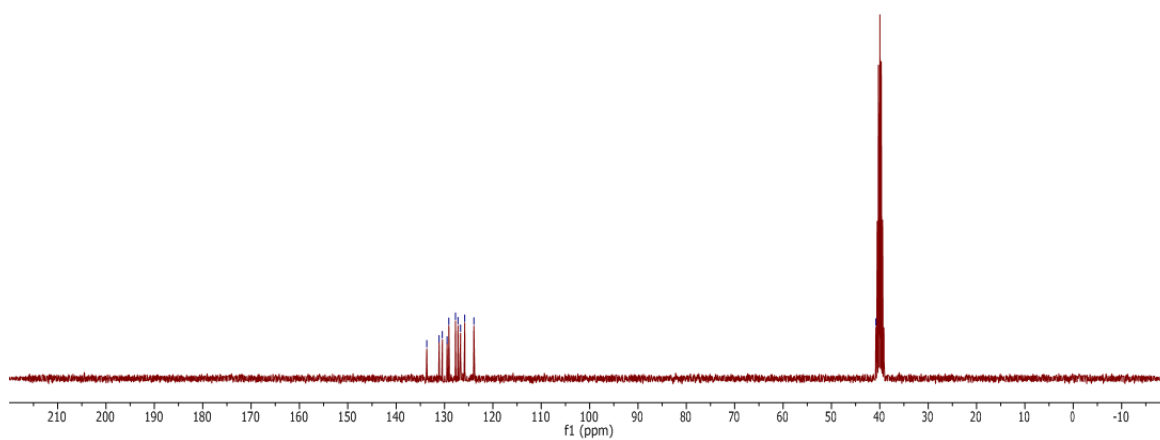

Supplementary Figure 15. <sup>13</sup>C NMR spectrum

1/0914.416.10.nd  
Kathir TMS-325  
Au1H DMSO {C:\Bruker\TopSpin3.5pl6} 1709 16

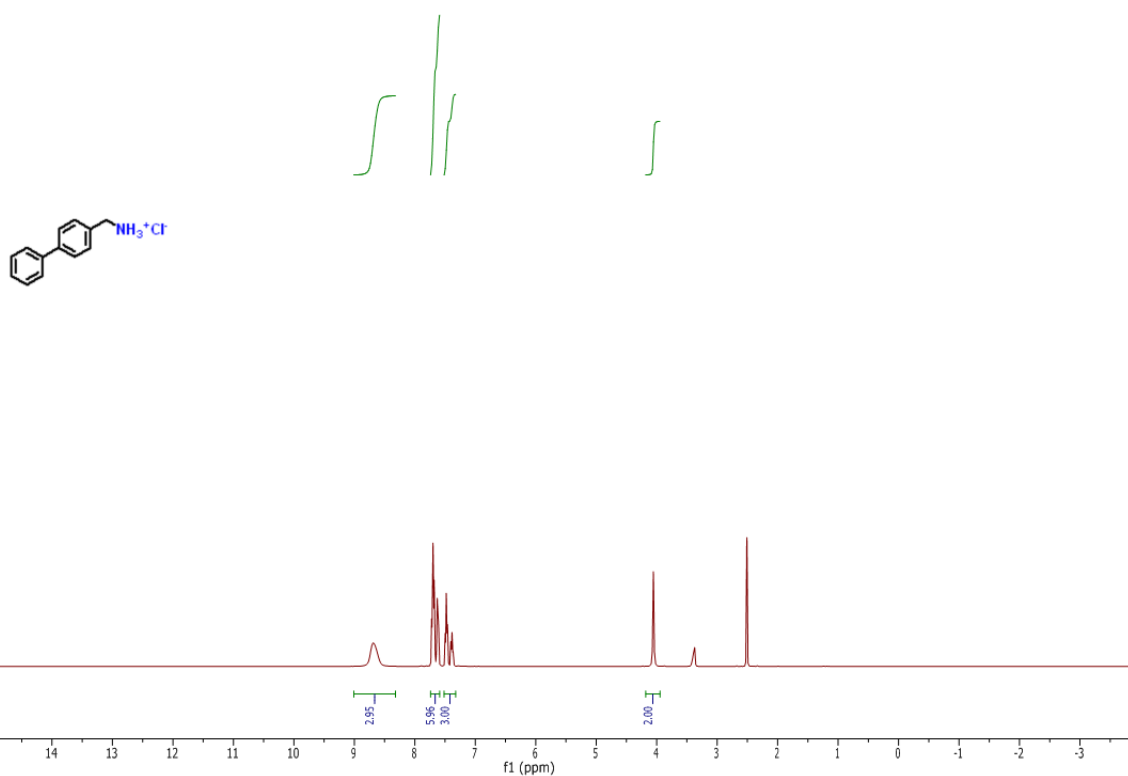

Supplementary Figure 16.  $^1\text{H}$  NMR spectrum

1/0914.416.11.nd  
Kathir TMS-325  
Au13C DMSO {C:\Bruker\TopSpin3.5pl6} 1709 16

140.61  
139.99  
133.76  
130.08  
129.45  
128.13  
127.20  
127.15

42.24

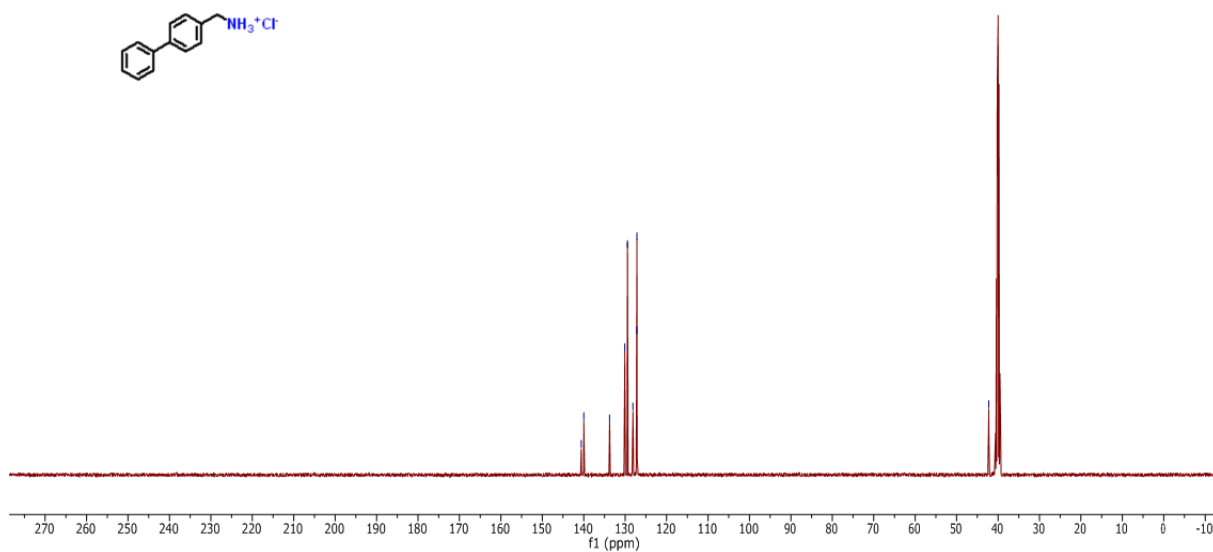

Supplementary Figure 17.  $^{13}\text{C}$  NMR spectrum



170913.f337.10.nd  
Thiru TM5-210  
PROTON DMSO {C:\Bruker\TopSpin3.5pl6} 1709 37

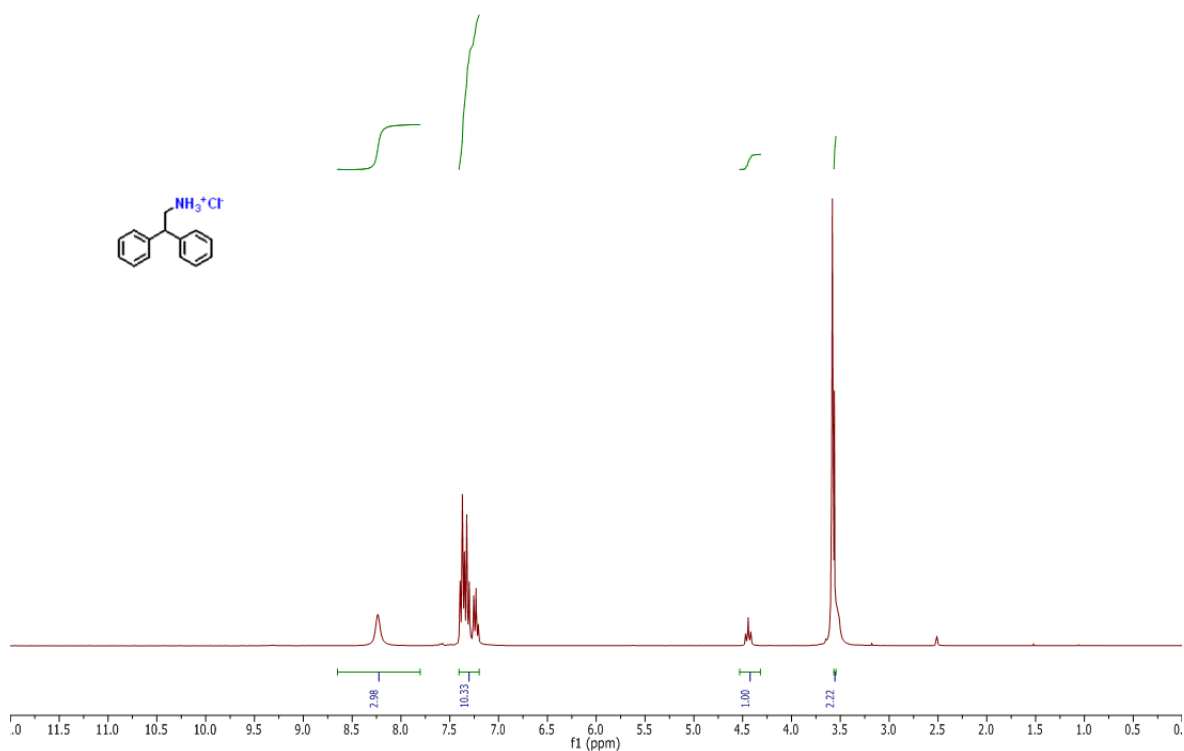

Supplementary Figure 18. <sup>1</sup>H NMR spectrum

170913.f337.11.nd  
Thiru TM5-210  
C13CPD DMSO {C:\Bruker\TopSpin3.5pl6} 1709 37

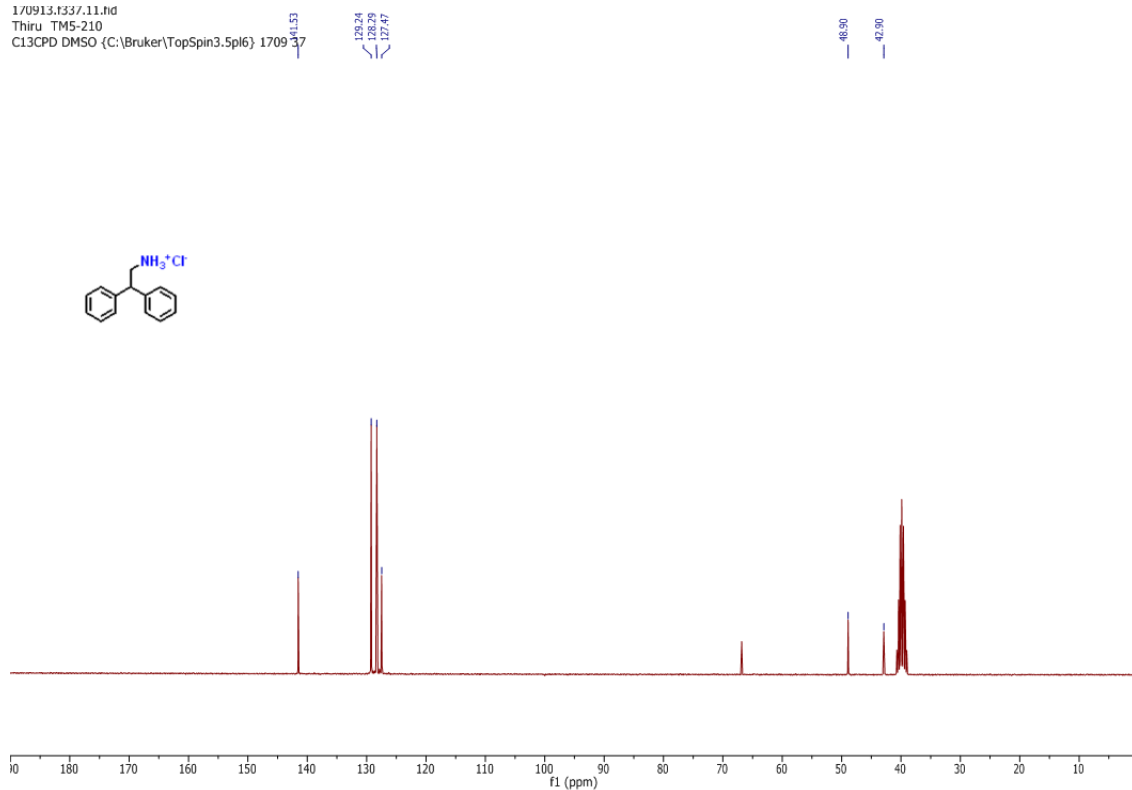

Supplementary Figure 19. <sup>13</sup>C NMR spectrum

170926.f312.10.fid  
Thiru TMS-244  
PROTON DMSO {C:\Bruker\TopSpin3.5pl6} 1709 12

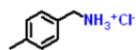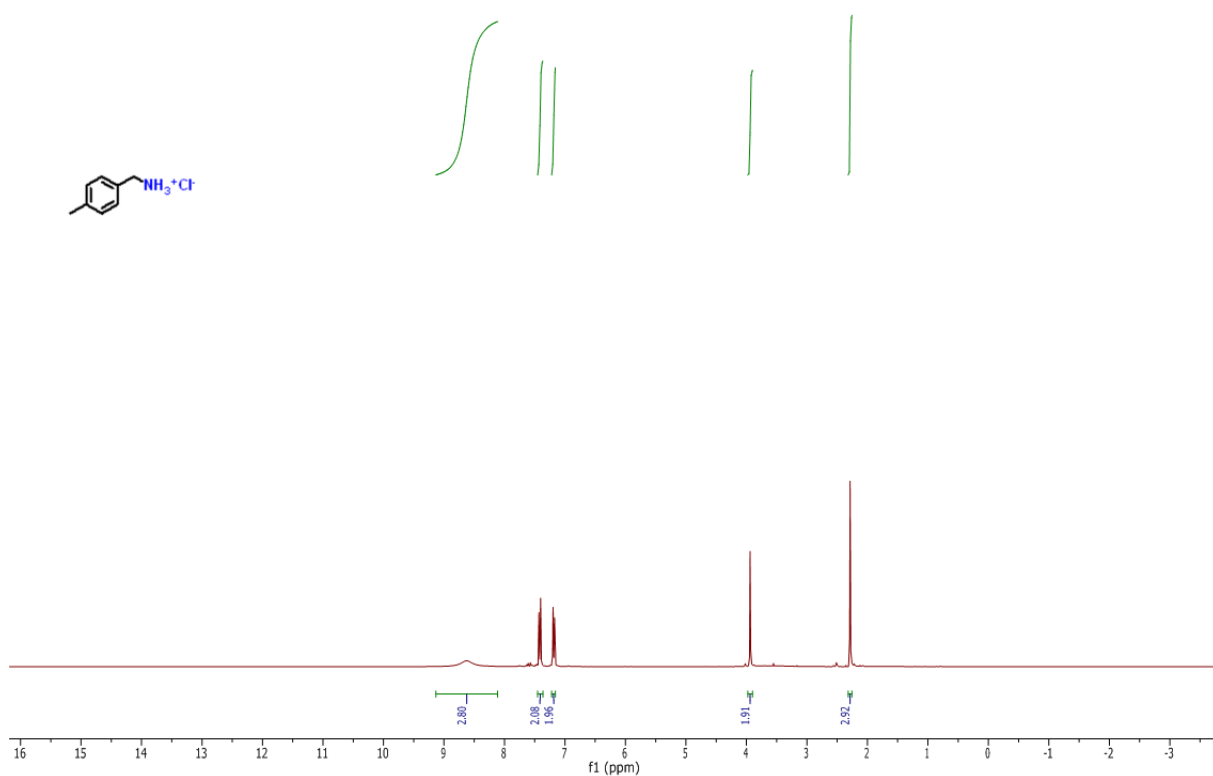

Supplementary Figure 20. <sup>1</sup>H NMR spectrum

170926.f312.11.fid  
Thiru TMS-244  
C13CPD DMSO {C:\Bruker\TopSpin3.5pl6} 1709 12

138.08  
131.51  
129.46  
129.46

42.34

21.24

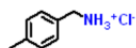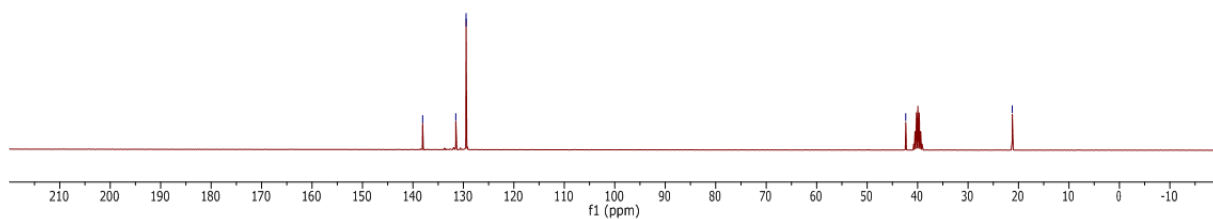

Supplementary Figure 21. <sup>13</sup>C NMR spectrum

1/0926.424.10.nd  
Thiru TMS-200  
Au1H DMSO {C:\Bruker\TopSpin3.5pl6} 1709 24

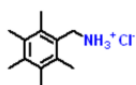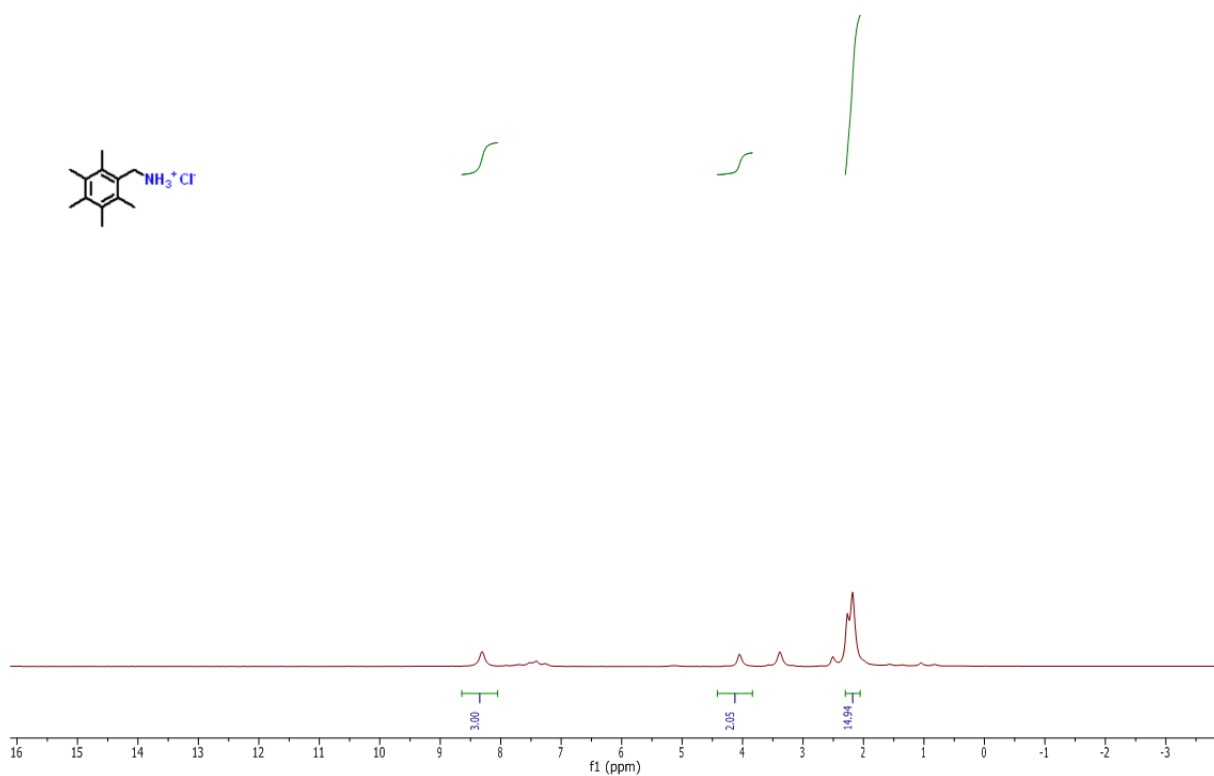

**Supplementary Figure 22.** <sup>1</sup>H NMR spectrum

1/0926.424.11.nd  
Thiru TMS-200  
Au13C DMSO {C:\Bruker\TopSpin3.5pl6} 1709 24

135.75  
133.61  
132.70  
128.46

37.73

16.97

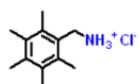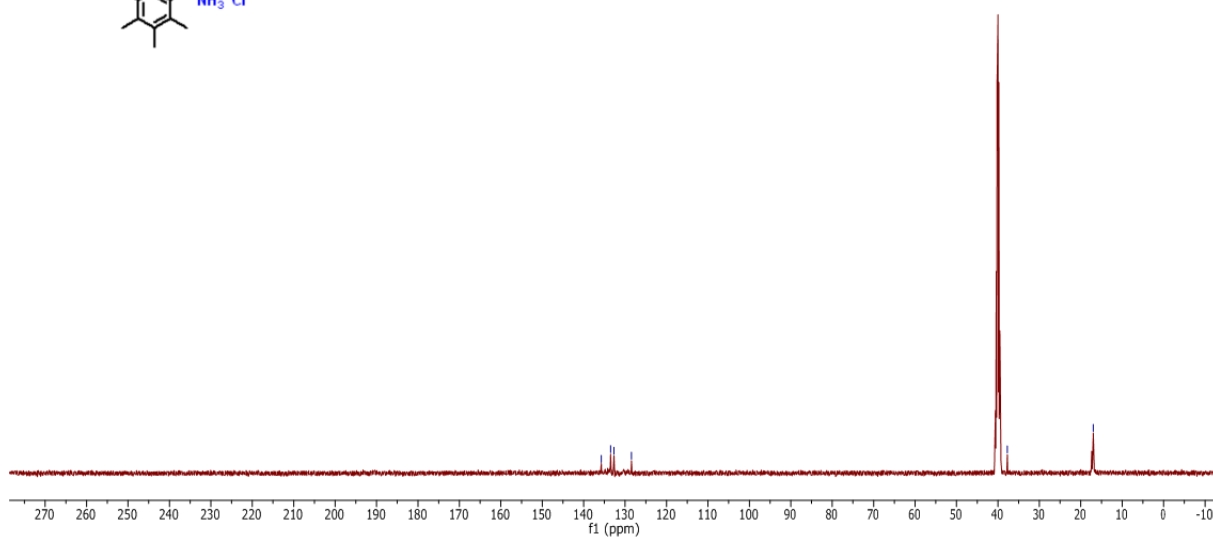

**Supplementary Figure 23.** <sup>13</sup>C NMR spectrum

1/0914.424.10.nd  
Kathir TMS-331  
Au1H DMSO {C:\Bruker\TopSpin3.5pl6} 1709 24

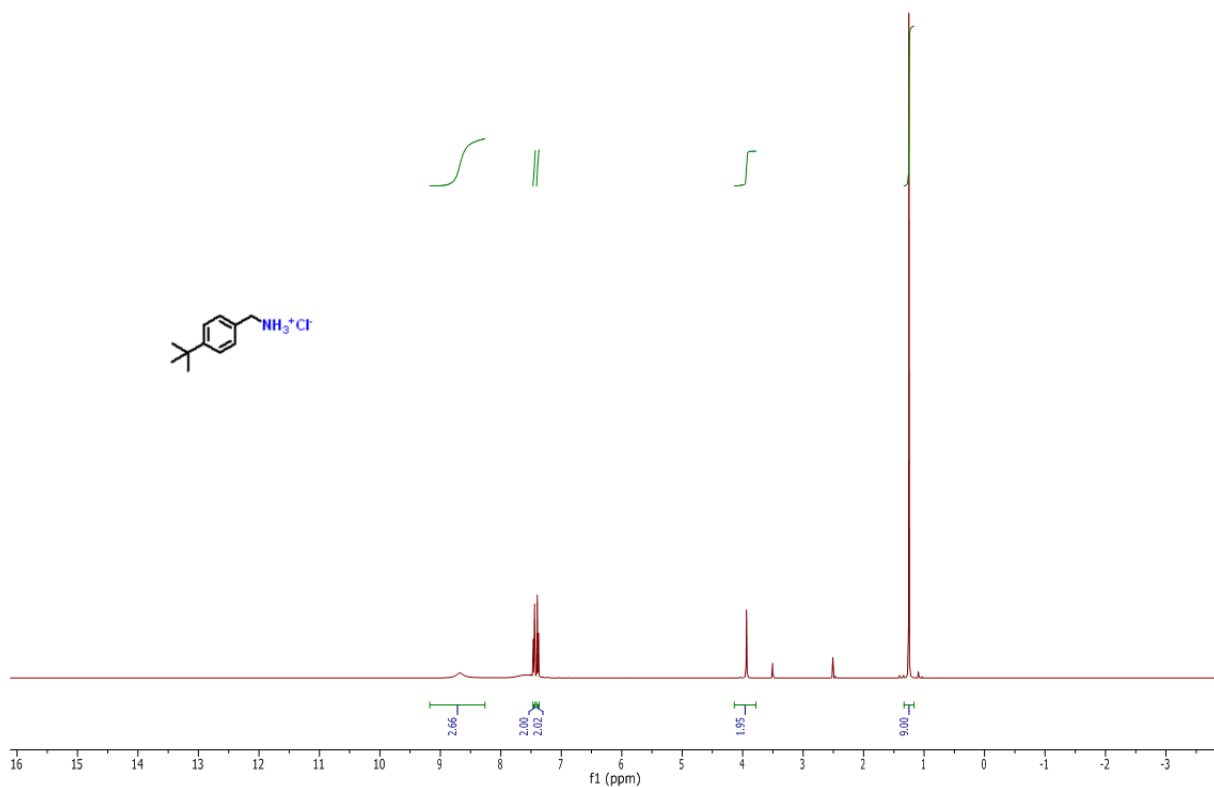

Supplementary Figure 24. <sup>1</sup>H NMR spectrum

1/0914.424.11.nd  
Kathir TMS-331  
Au13C DMSO {C:\Bruker\TopSpin3.5pl6} 1709 24

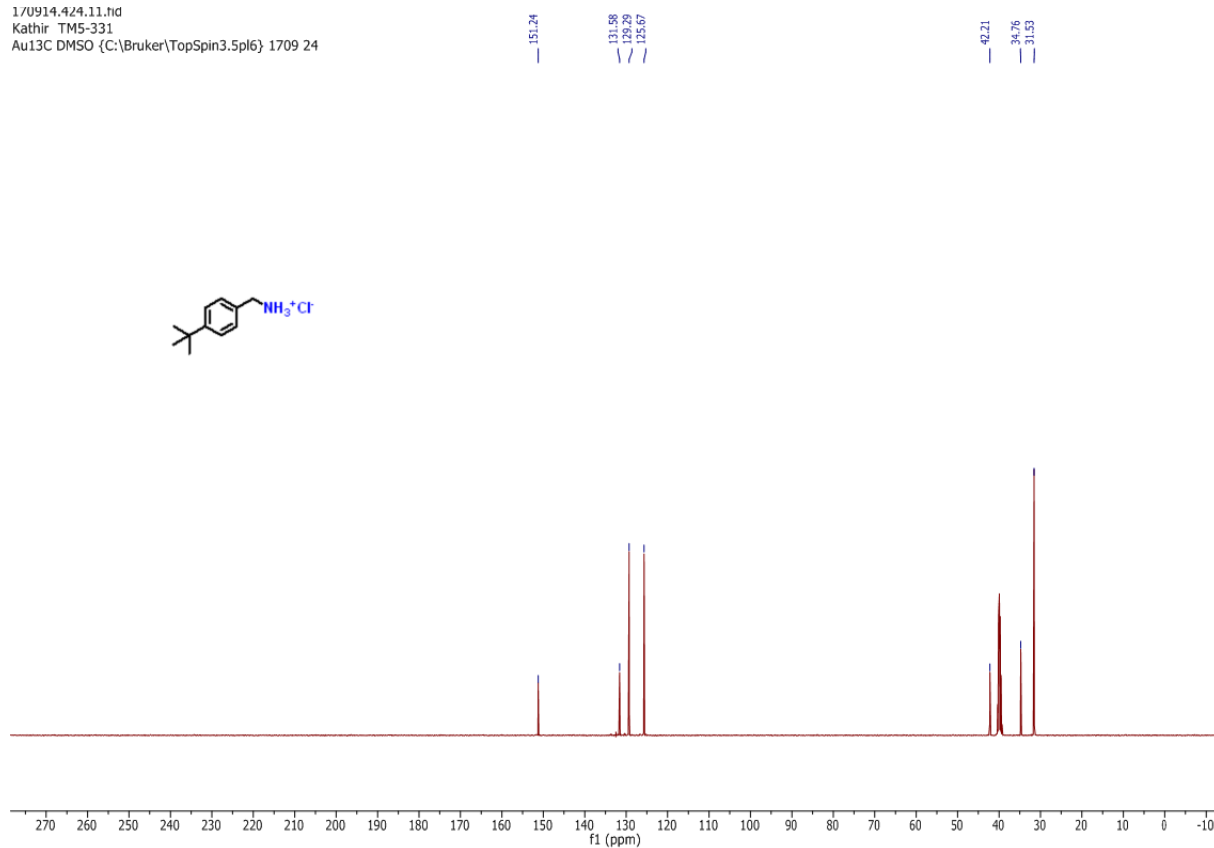

Supplementary Figure 25. <sup>13</sup>C NMR spectrum

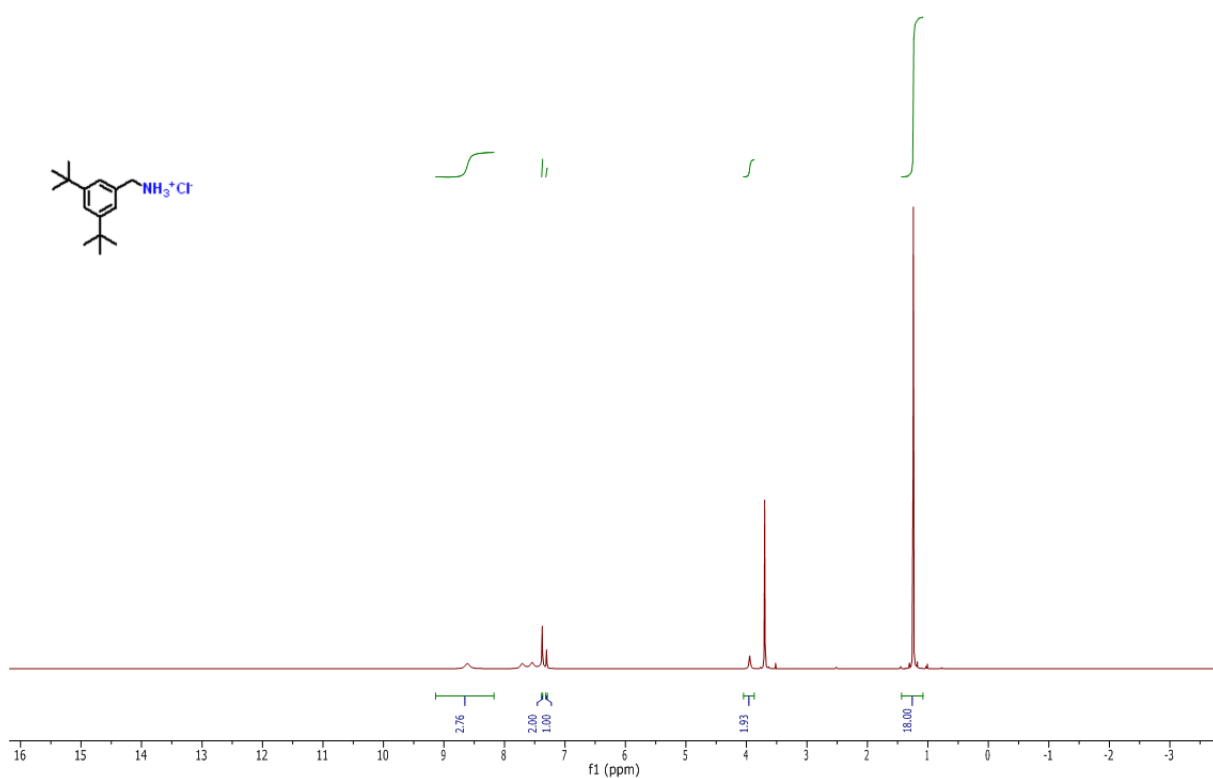

Supplementary Figure 26.  $^1\text{H}$  NMR spectrum

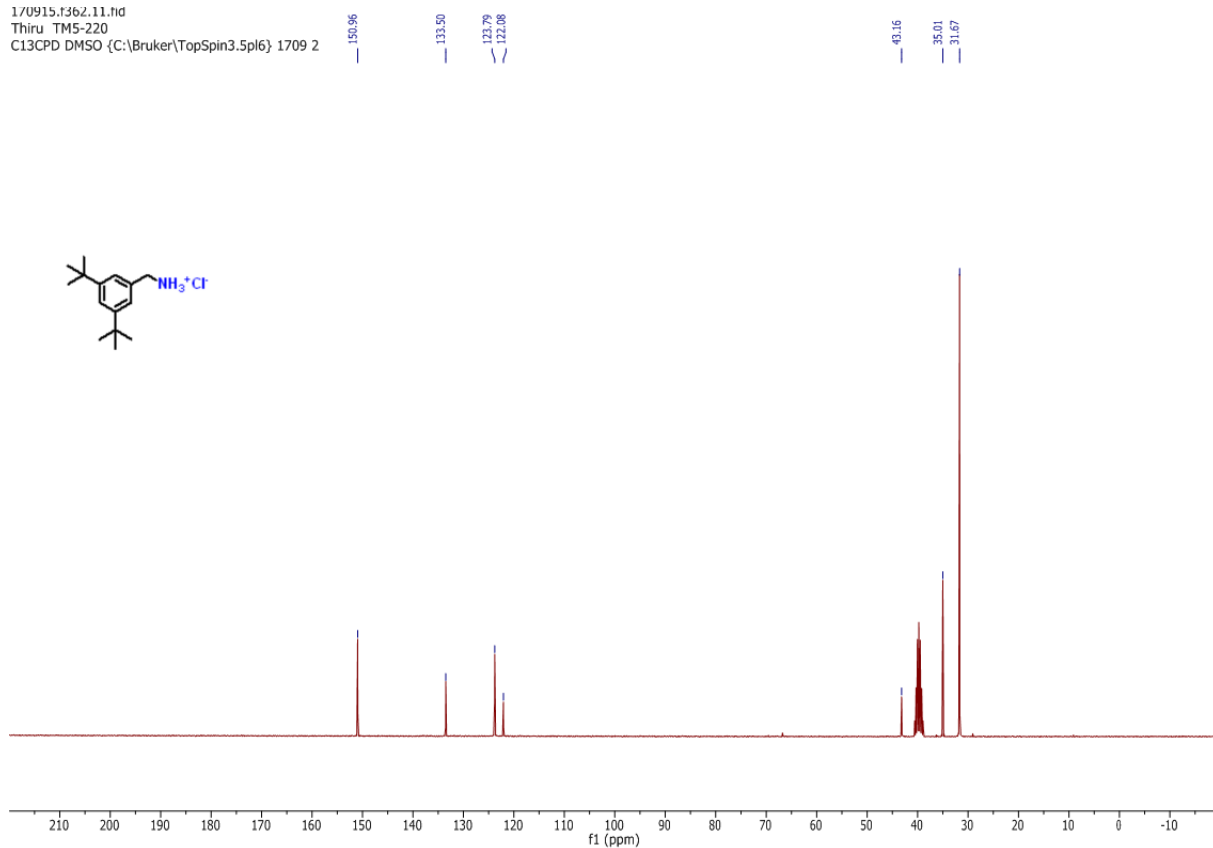

Supplementary Figure 27.  $^{13}\text{C}$  NMR spectrum

171023.406.10.nd  
Thiru TMS-226  
Au1H DMSO {C:\Bruker\TopSpin3.5pl6} 1710 6

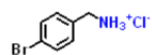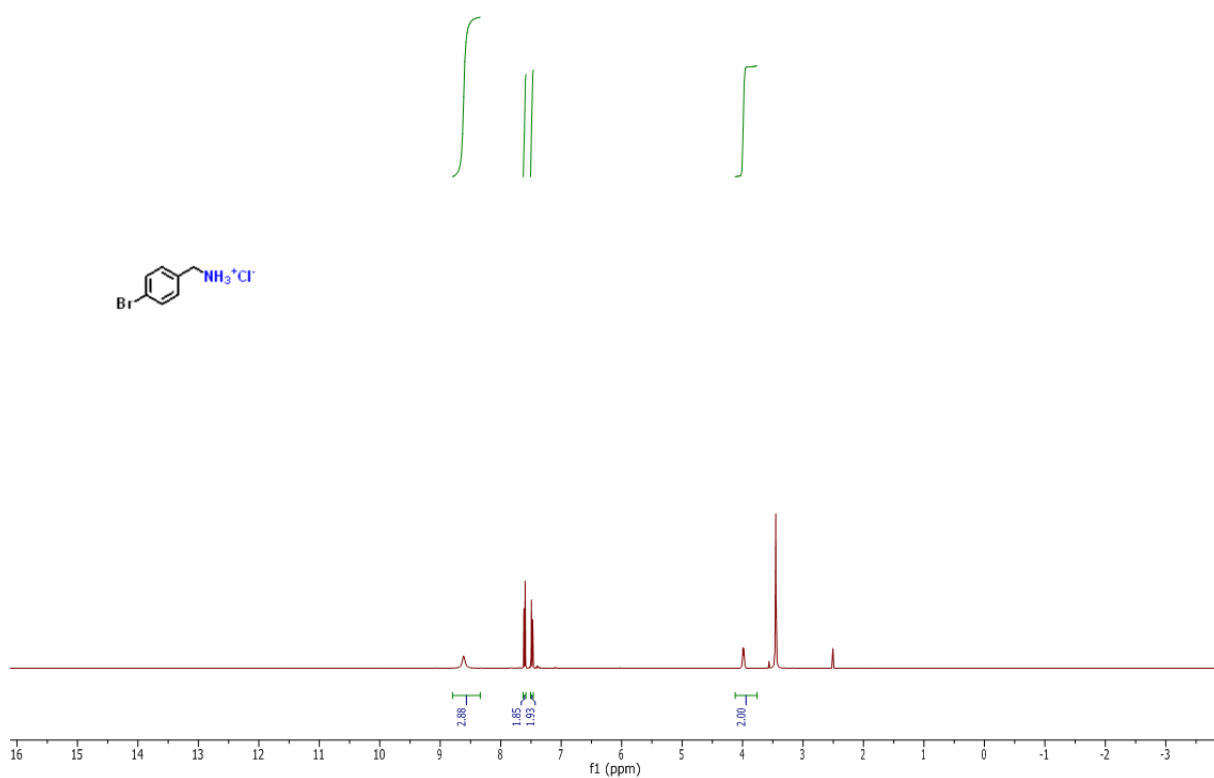

Supplementary Figure 28. <sup>1</sup>H NMR spectrum

171023.406.11.nd  
Thiru TMS-226  
Au13C DMSO {C:\Bruker\TopSpin3.5pl6} 1710 6

133.94  
131.85  
131.77

122.15

41.90

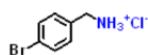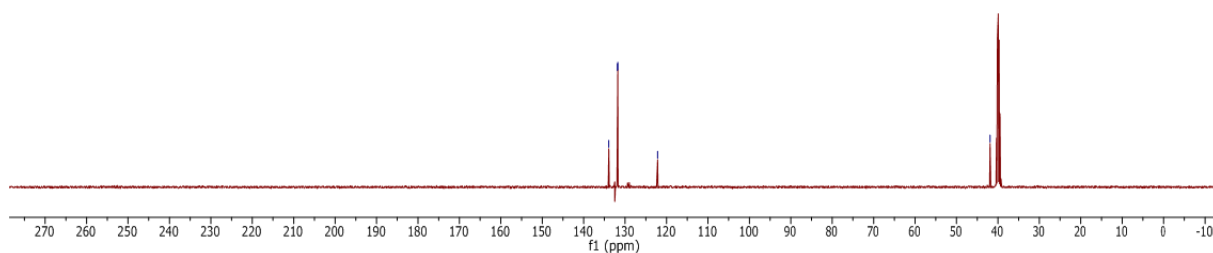

Supplementary Figure 29. <sup>13</sup>C NMR spectrum

1/1006.f324.10.fid  
Thiru TM5-328  
PROTON DMSO {C:\Bruker\TopSpin3.5pl6} 1710 24

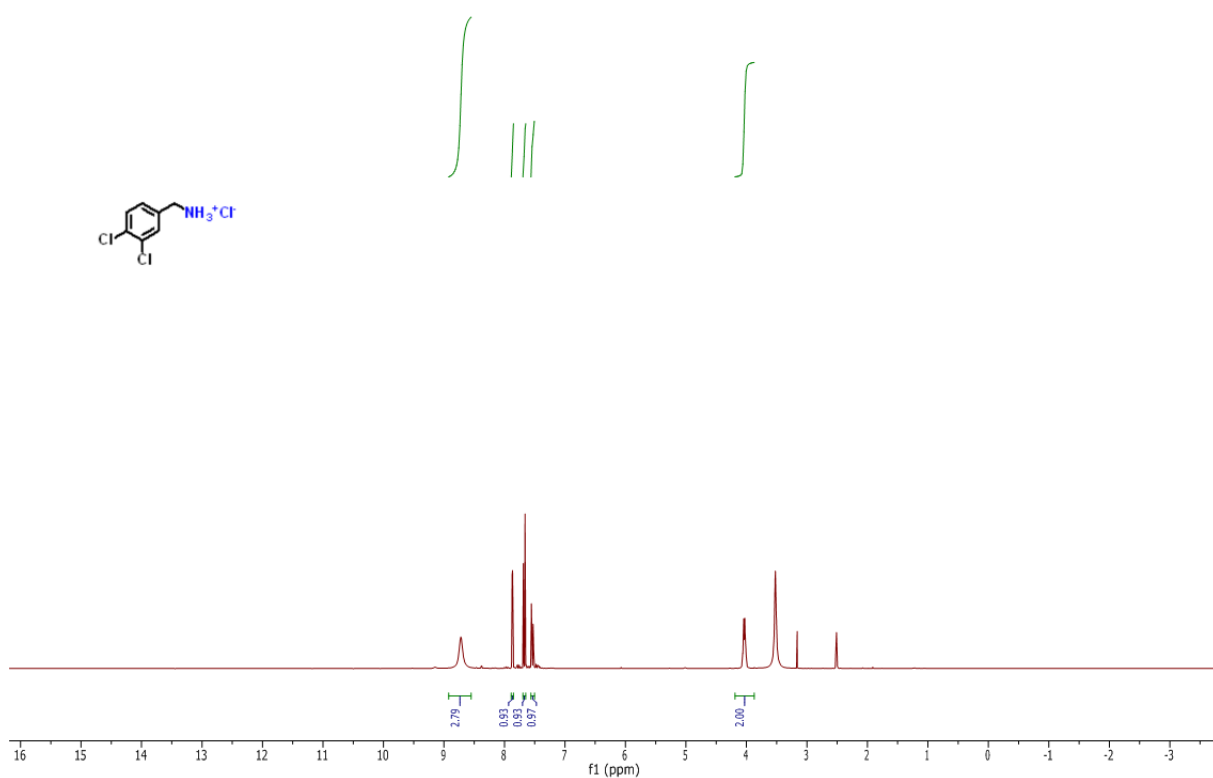

Supplementary Figure 30.  $^1\text{H}$  NMR spectrum

1/1006.f324.11.fid  
Thiru TM5-328  
C13CPD DMSO {C:\Bruker\TopSpin3.5pl6} 1710 24

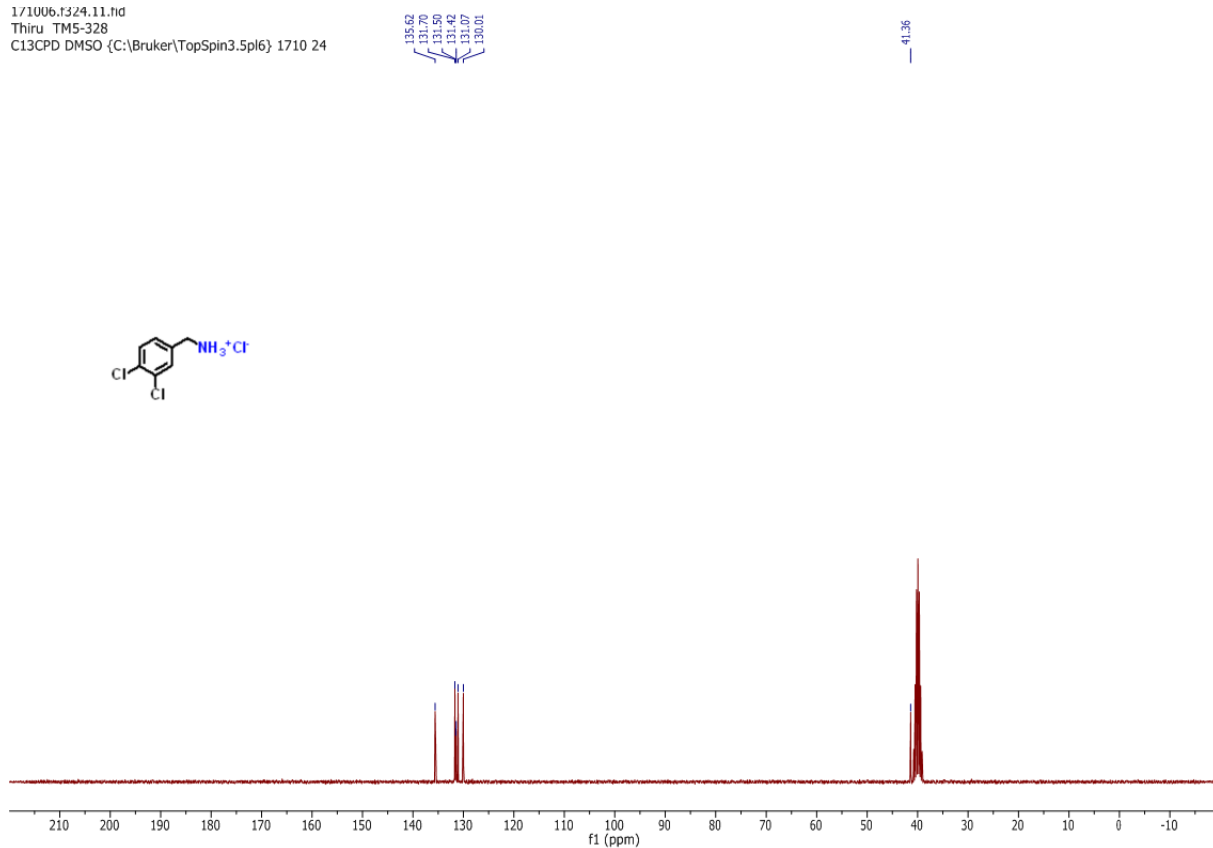

Supplementary Figure 31.  $^{13}\text{C}$  NMR spectrum

170925.f330.10.fid  
Thiru TM5-245  
PROTON DMSO {C:\Bruker\TopSpin3.5pl6} 1709 30

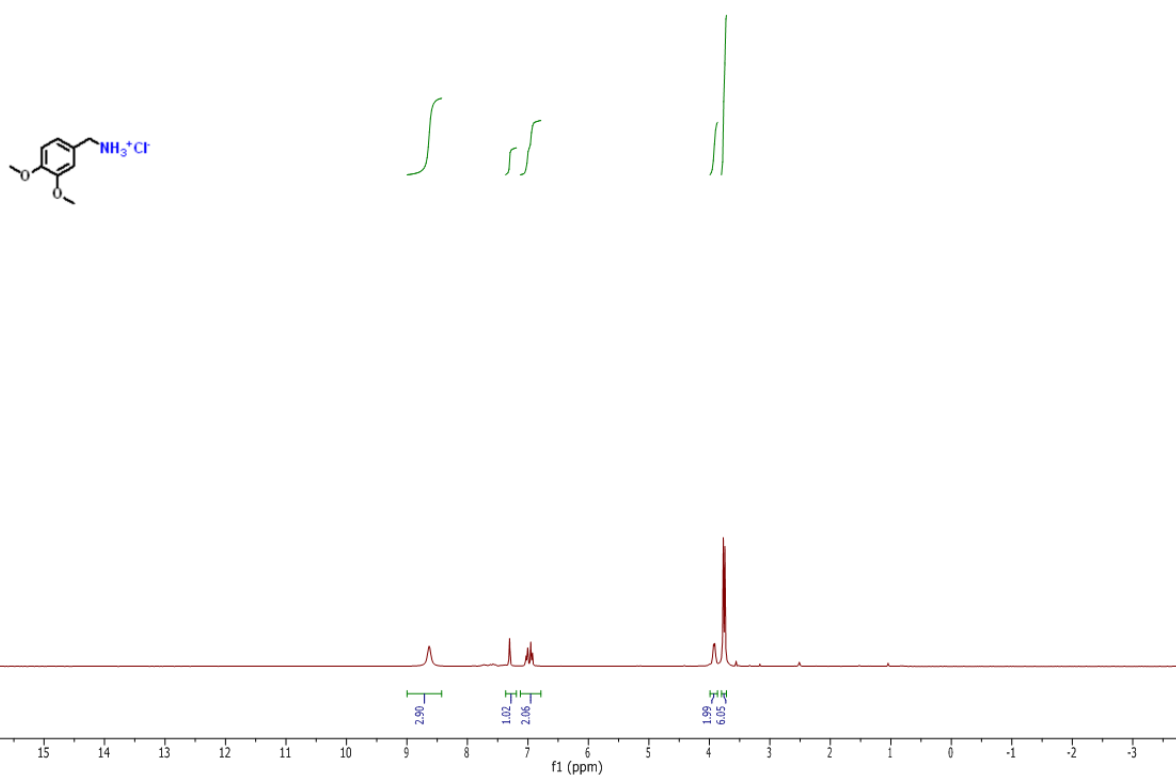

Supplementary Figure 32. <sup>1</sup>H NMR spectrum

170925.f330.11.fid  
Thiru TM5-245  
C13CPD DMSO {C:\Bruker\TopSpin3.5pl6} 1709 30

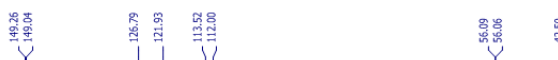

Supplementary Figure 33. <sup>13</sup>C NMR spectrum



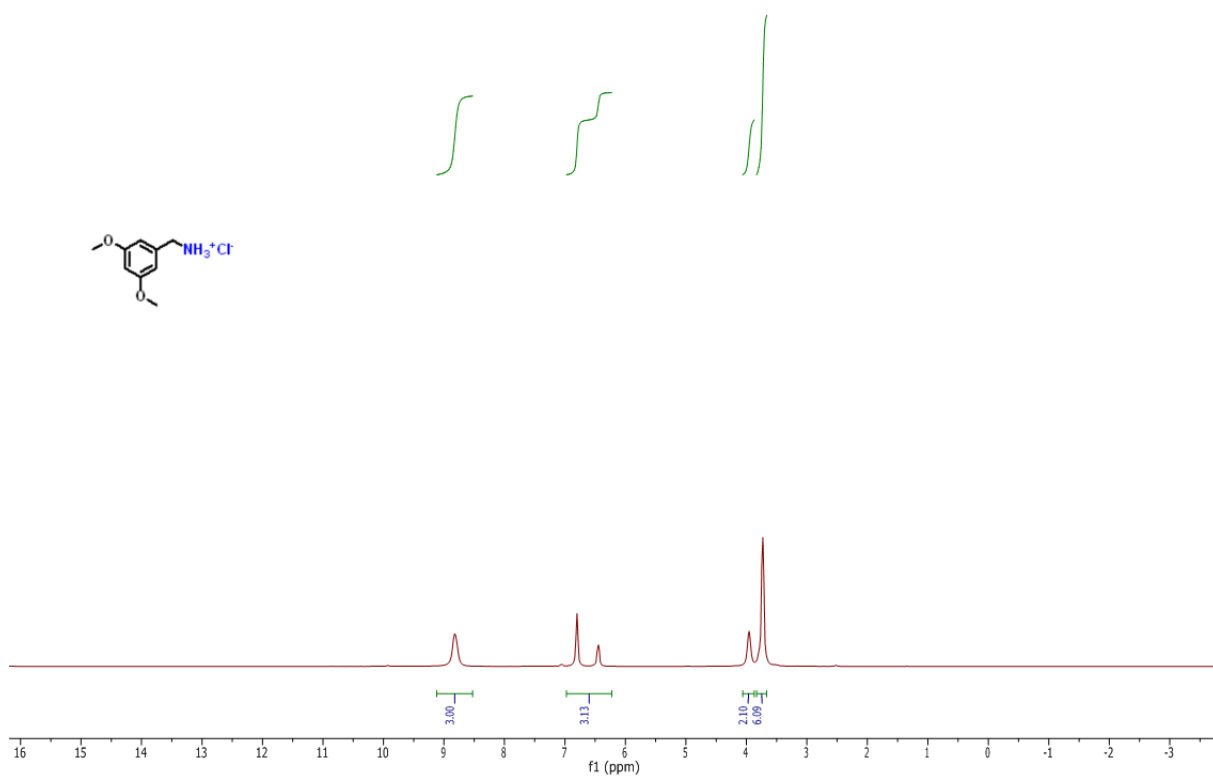

Supplementary Figure 34. <sup>1</sup>H NMR spectrum

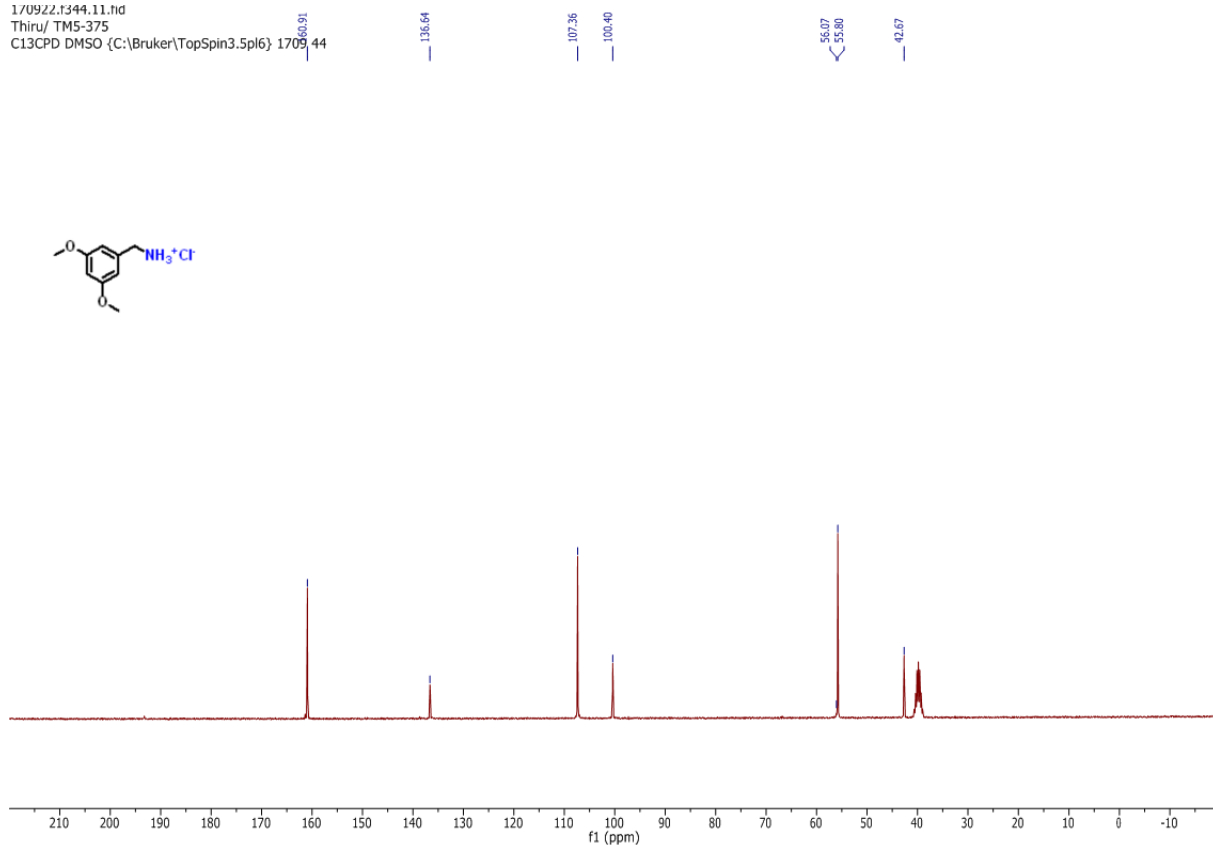

Supplementary Figure 35. <sup>13</sup>C NMR spectrum

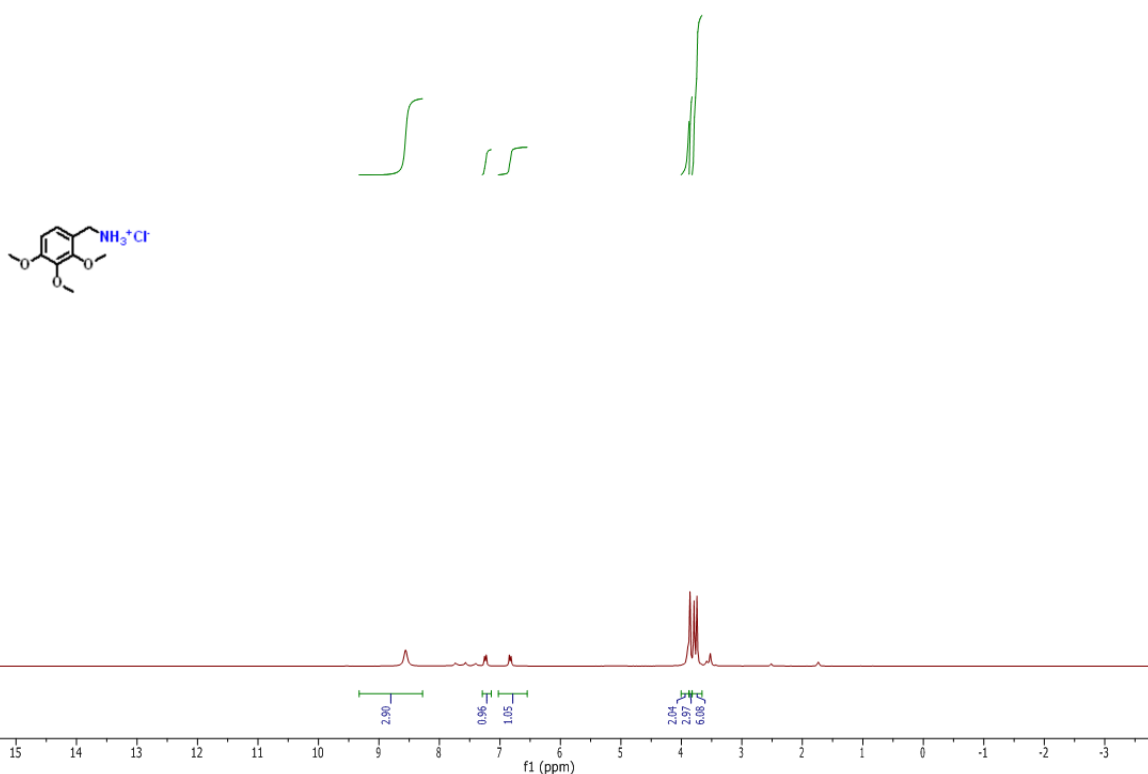

Supplementary Figure 36. <sup>1</sup>H NMR spectrum

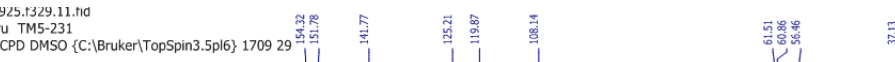

Supplementary Figure 37. <sup>13</sup>C NMR spectrum

170925.f322.10.fid  
Thiru TM5-243  
PROTON DMSO {C:\Bruker\TopSpin3.5pl6} 1709 22

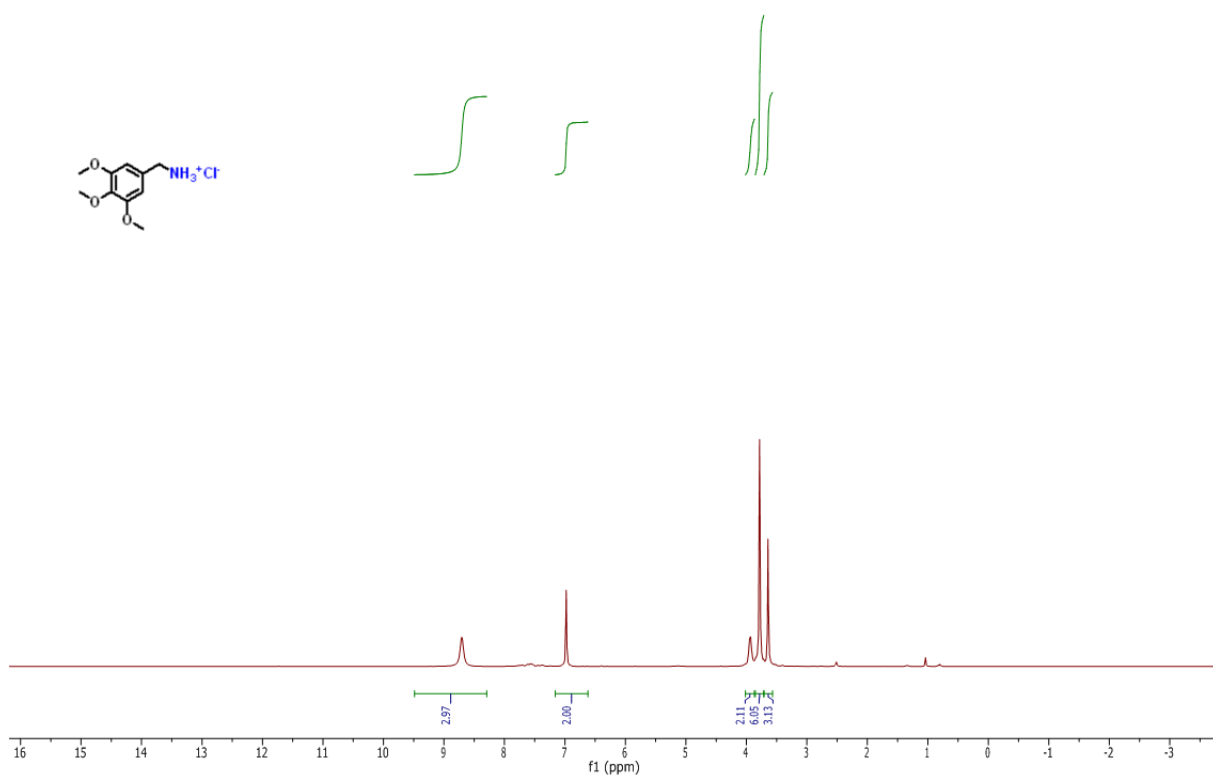

Supplementary Figure 38. <sup>1</sup>H NMR spectrum

170925.f322.11.fid  
Thiru TM5-243  
C13CPD DMSO {C:\Bruker\TopSpin3.5pl6} 1709 22

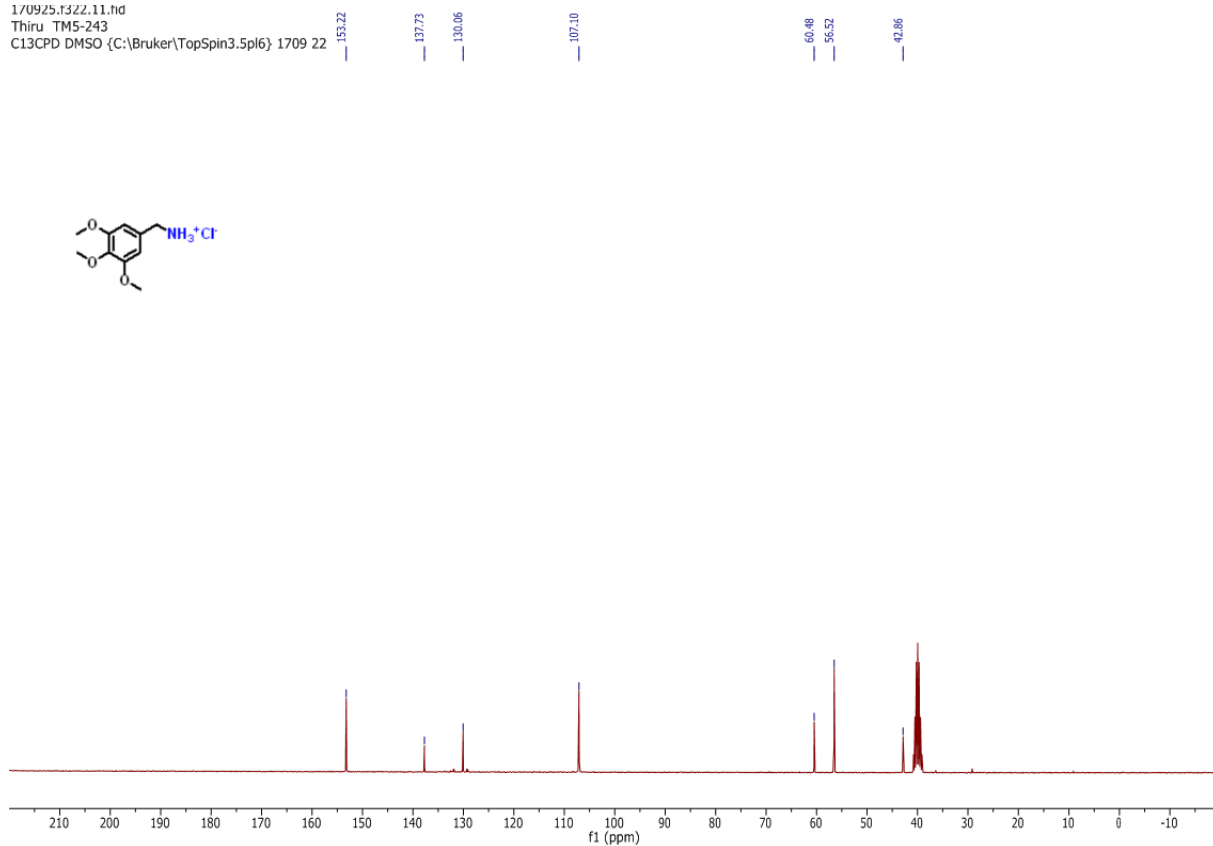

Supplementary Figure 39. <sup>13</sup>C NMR spectrum

170913.1339.10.fid  
Thiru TM5-222  
PROTON DMSO {C:\Bruker\TopSpin3.5pl6} 1709 39

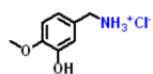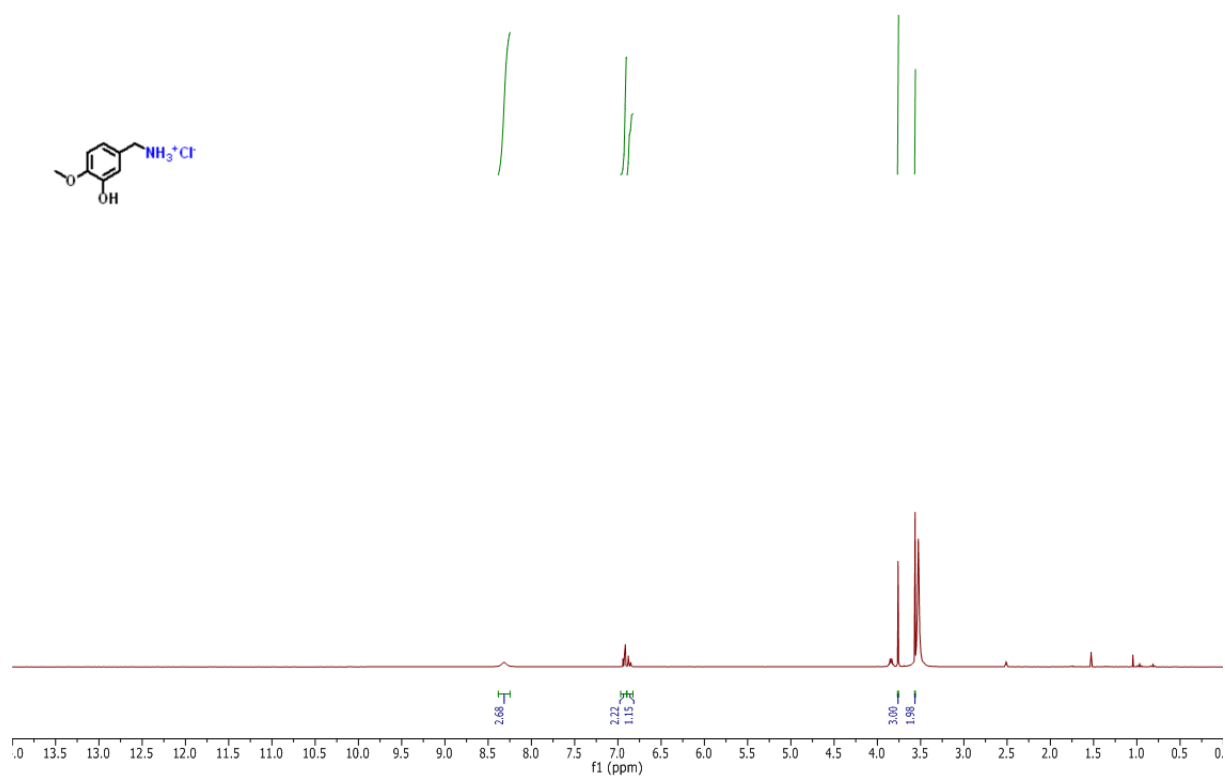

Supplementary Figure 40. <sup>1</sup>H NMR spectrum

170913.1339.11.fid  
Thiru TM5-222  
C13CPD DMSO {C:\Bruker\TopSpin3.5pl6} 1709 39

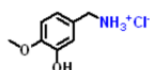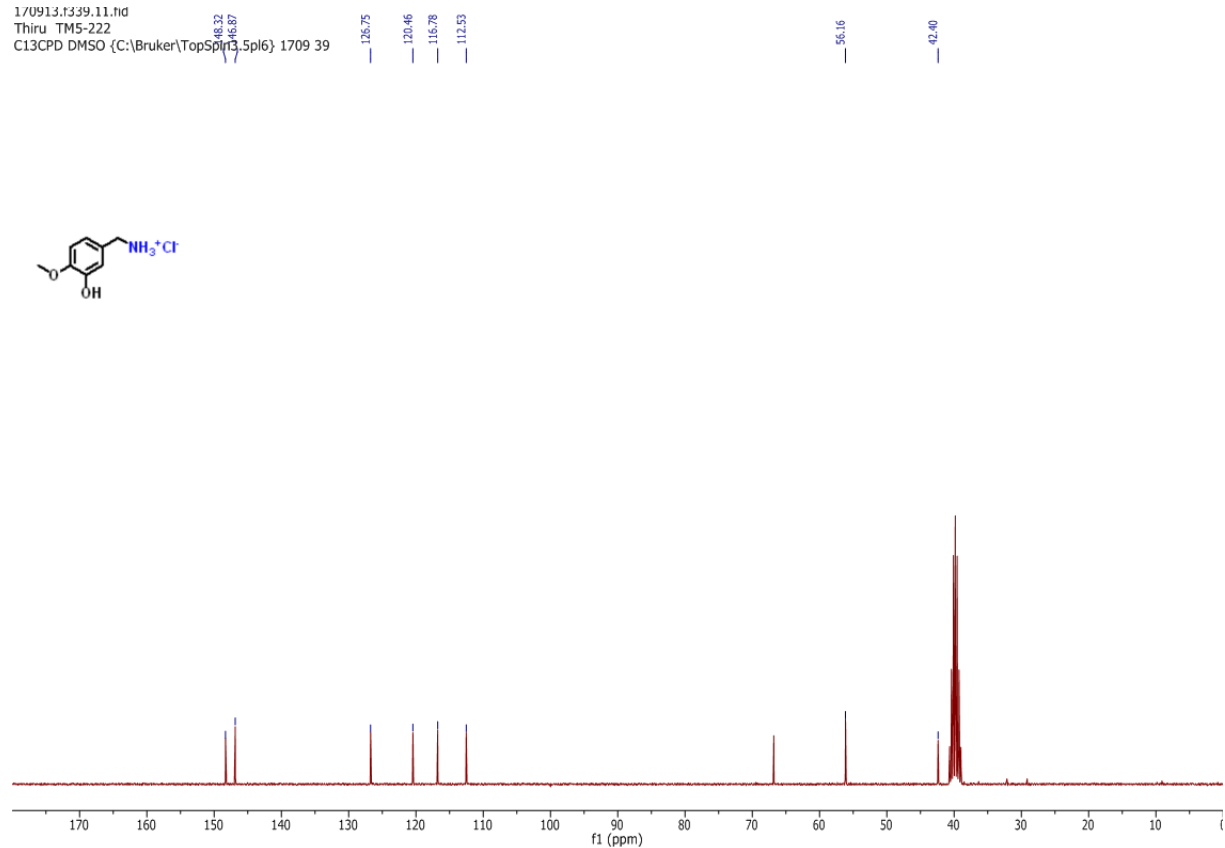

Supplementary Figure 41. <sup>13</sup>C NMR spectrum

1/1005.401.10.nd  
Thiru TMS-246  
Au1H DMSO {C:\Bruker\TopSpin3.5pl6} 1710 1

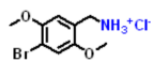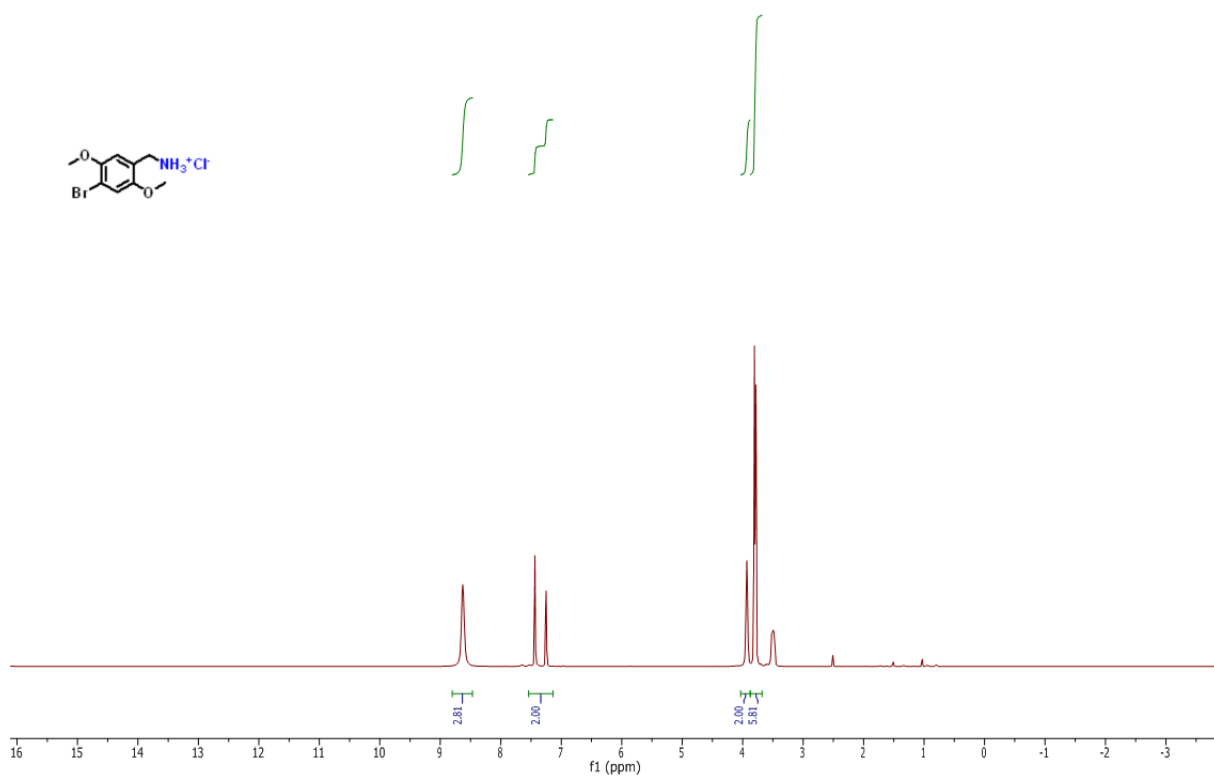

Supplementary Figure 42. <sup>1</sup>H NMR spectrum

1/1005.401.11.nd  
Thiru TMS-246  
Au13C DMSO {C:\Bruker\TopSpin3.5pl6} 1710 1

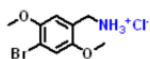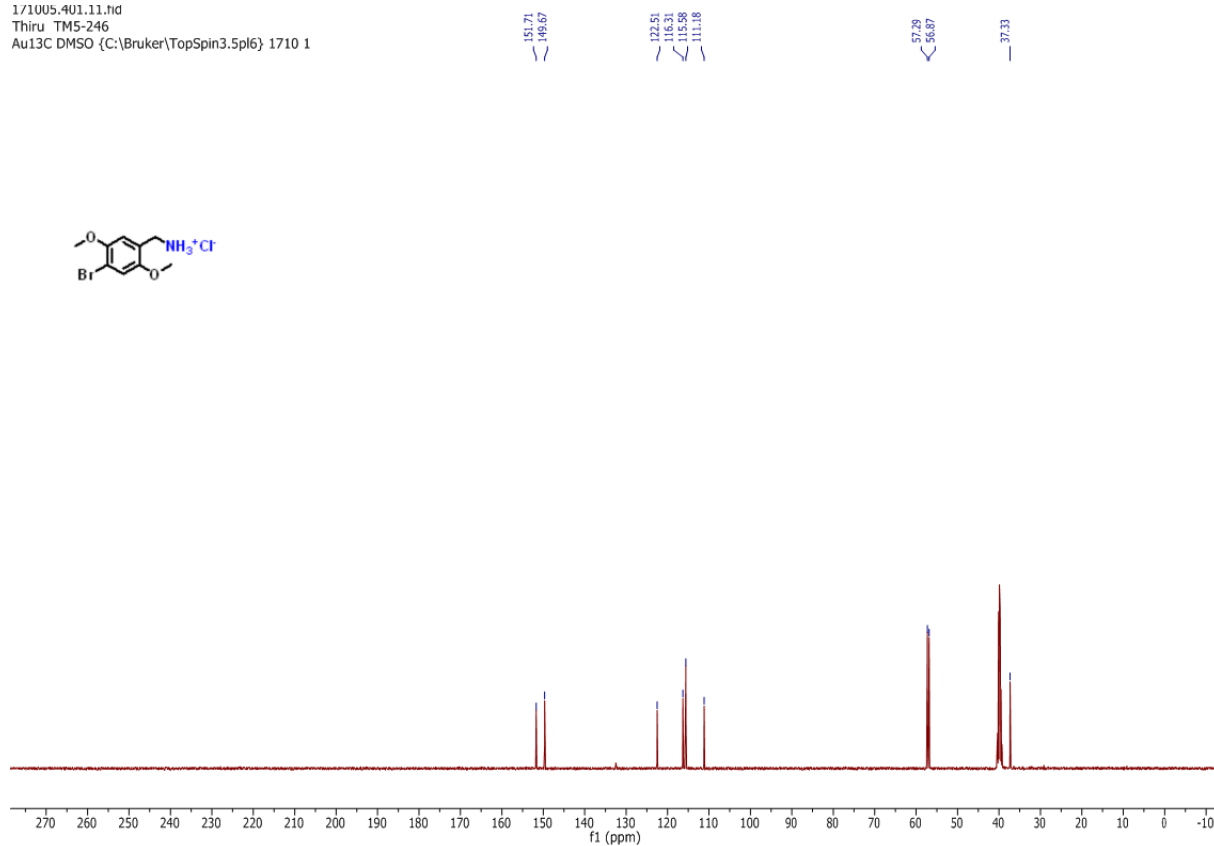

Supplementary Figure 43. <sup>13</sup>C NMR spectrum

1/0914.415.10.nd  
Kathir TMS-324  
Au1H DMSO {C:\Bruker\TopSpin3.5pl6} 1709 15

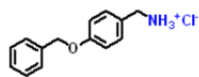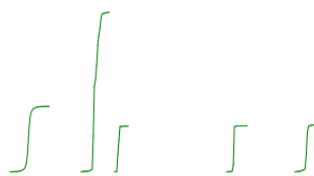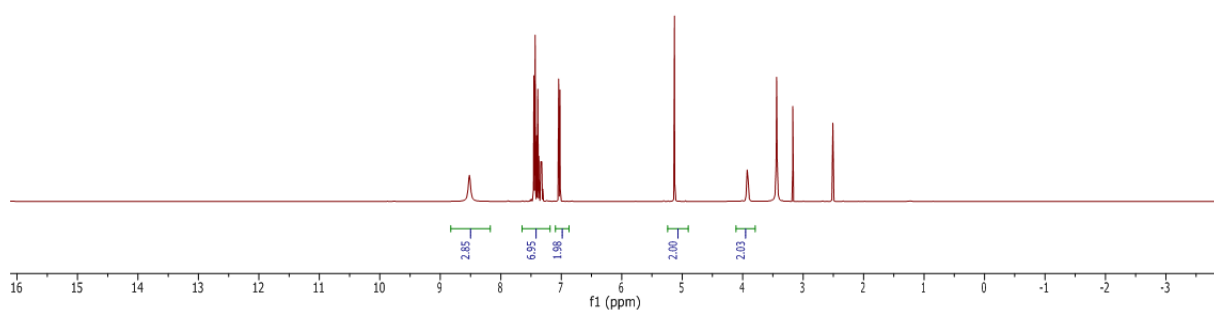

**Supplementary Figure 44.**  $^1\text{H}$  NMR spectrum

1/0914.415.11.nd  
Kathir TMS-324  
Au13C DMSO {C:\Bruker\TopSpin3.5pl6} 1709 15

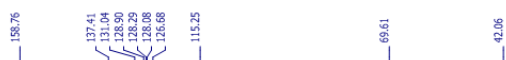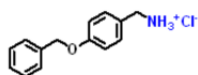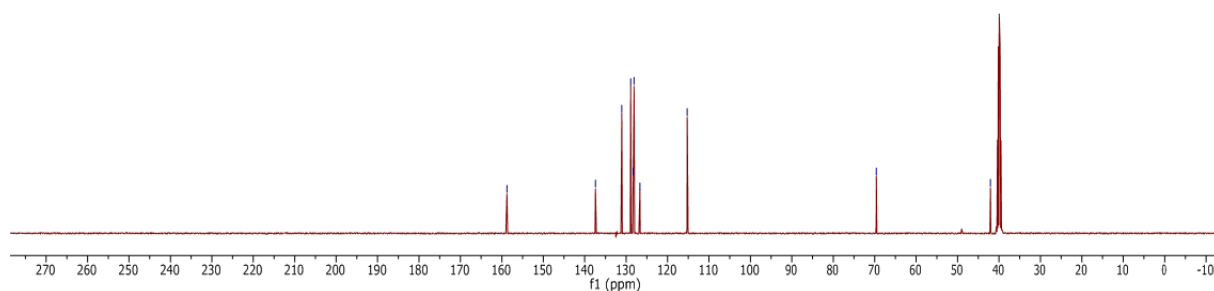

**Supplementary Figure 45.**  $^{13}\text{C}$  NMR spectrum

1/0815.1335.10.fid  
Thiru TM5-190  
PROTON DMSO {C:\Bruker\TopSpin3.5pl6} 1708 35

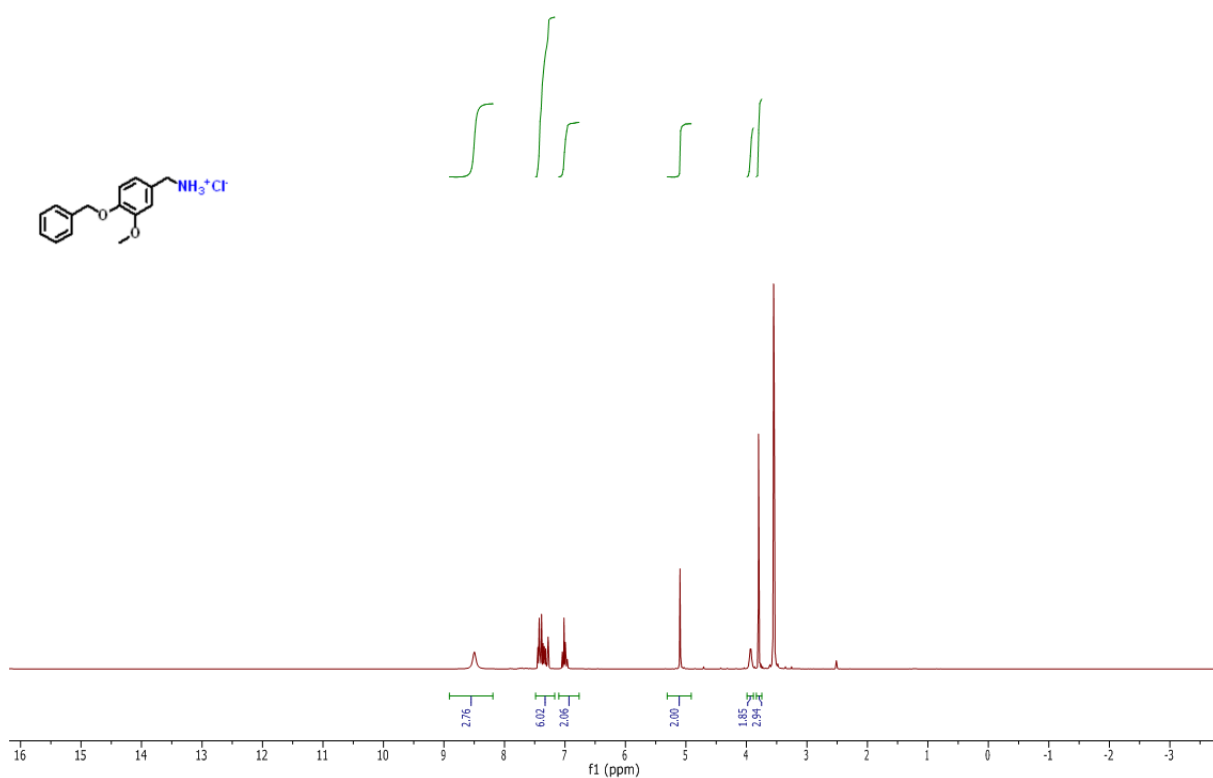

Supplementary Figure 46. <sup>1</sup>H NMR spectrum

1/0815.1335.11.fid  
Thiru TM5-190  
C13CPD DMSO {C:\Bruker\TopSpin3.5pl6} 1708 35

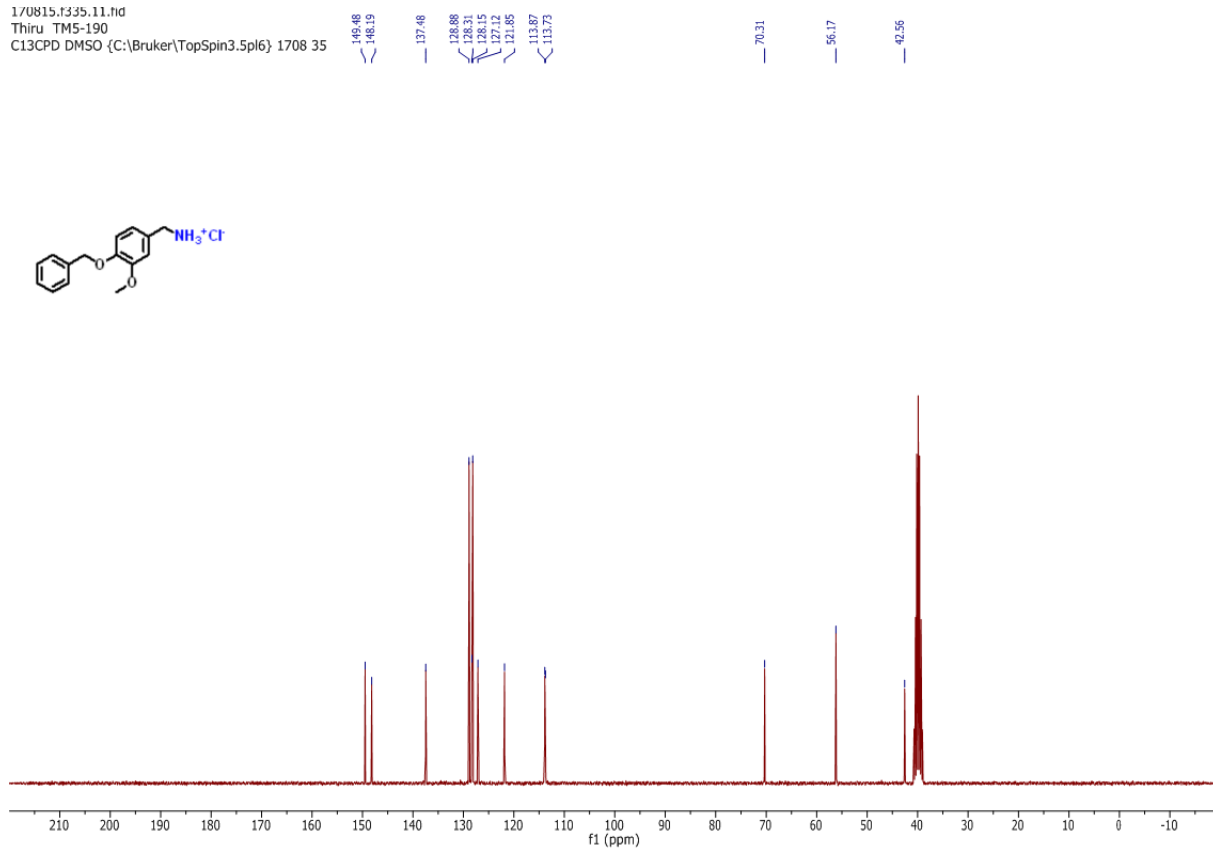

Supplementary Figure 47. <sup>13</sup>C NMR spectrum

170914.423.10.nd  
Kathir TMS-335  
Au1H DMSO {C:\Bruker\TopSpin3.5pl6} 1709 23

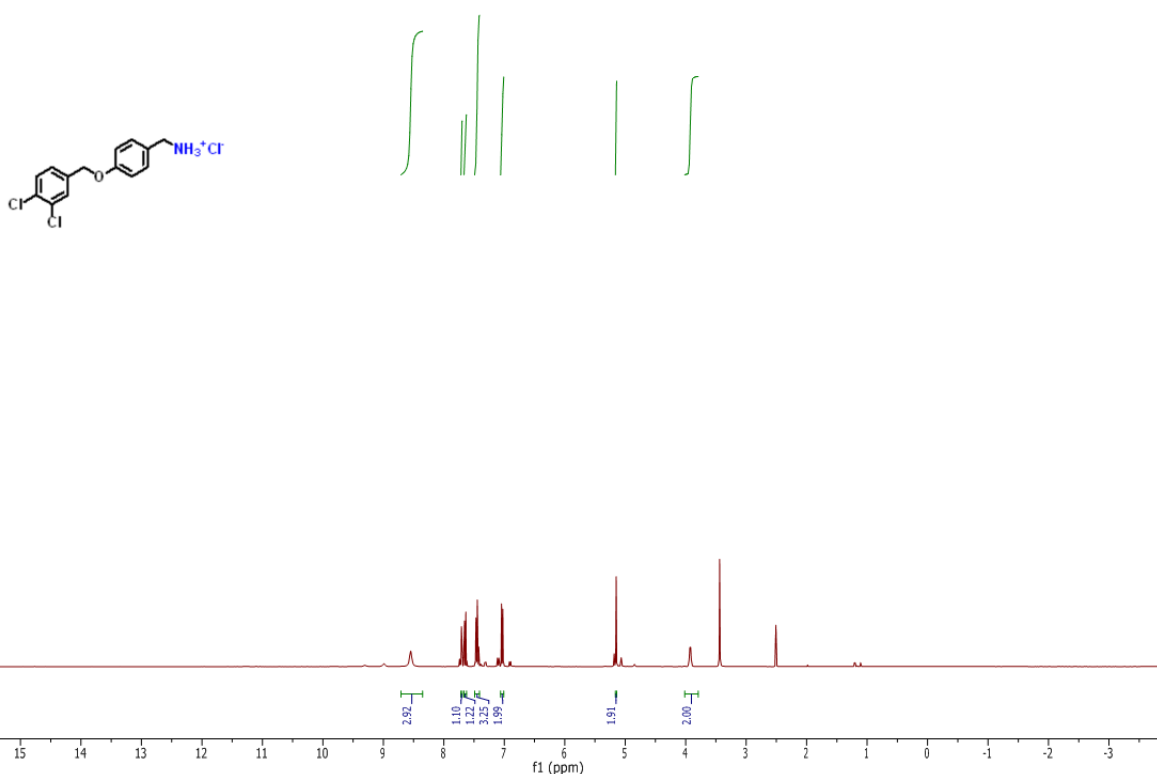

Supplementary Figure 48. <sup>1</sup>H NMR spectrum

170914.423.11.nd  
Kathir TMS-335  
Au13C DMSO {C:\Bruker\TopSpin3.5pl6} 1709 23

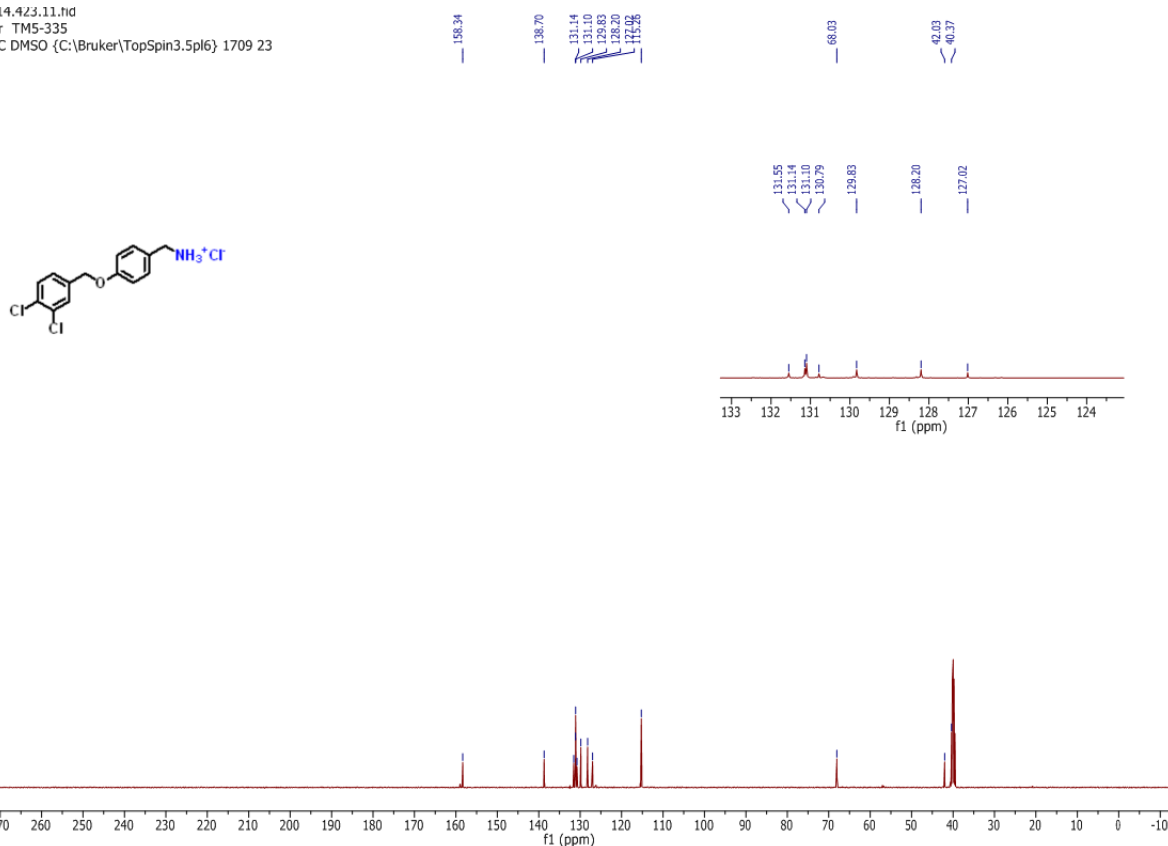

Supplementary Figure 49. <sup>13</sup>C NMR spectrum



170915.336.1.hd  
Thiru TMS-357  
Au1H DMSO {C:\Bruker\TopSpin3.5pl6} 1709 36

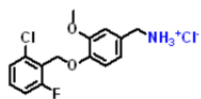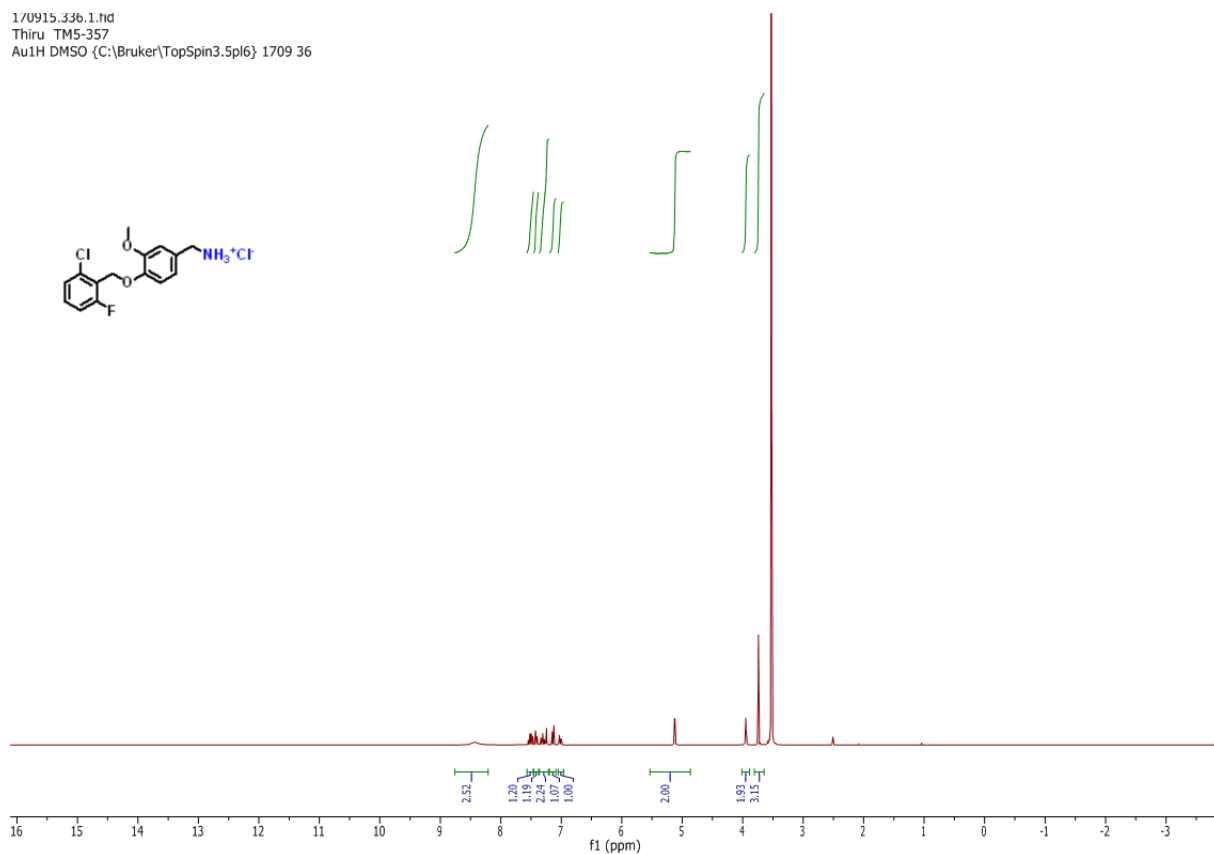

Supplementary Figure 50. <sup>1</sup>H NMR spectrum

170915.336.2.hd  
Thiru TMS-357  
Au13C DMSO {C:\Bruker\TopSpin3.5pl6} 1709 36

163.59 160.28 149.51 148.10 136.02 135.95 132.38 129.75 127.88 126.20 126.16 122.58 122.34 121.86 115.37 114.68 114.12 113.69 62.14 62.08 56.05 42.52

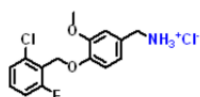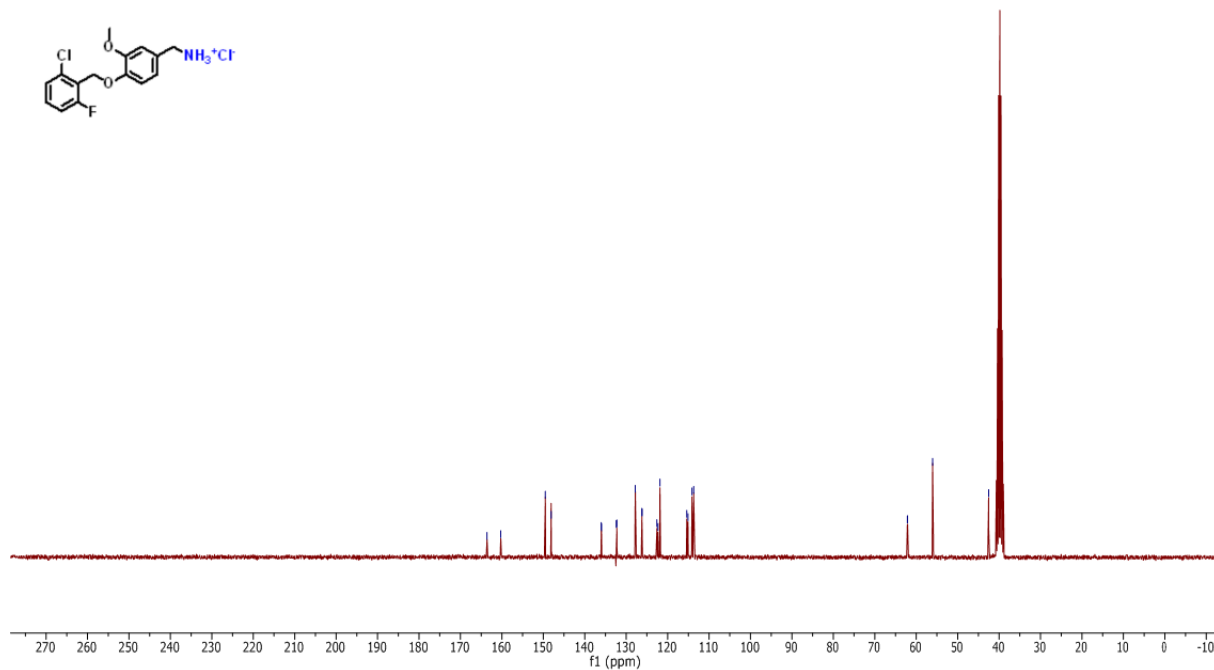

Supplementary Figure 51. <sup>13</sup>C NMR spectrum

1/0914.421.10.nd  
Kathir TMS-329  
Au1H DMSO {C:\Bruker\TopSpin3.5pl6} 1709 21

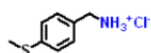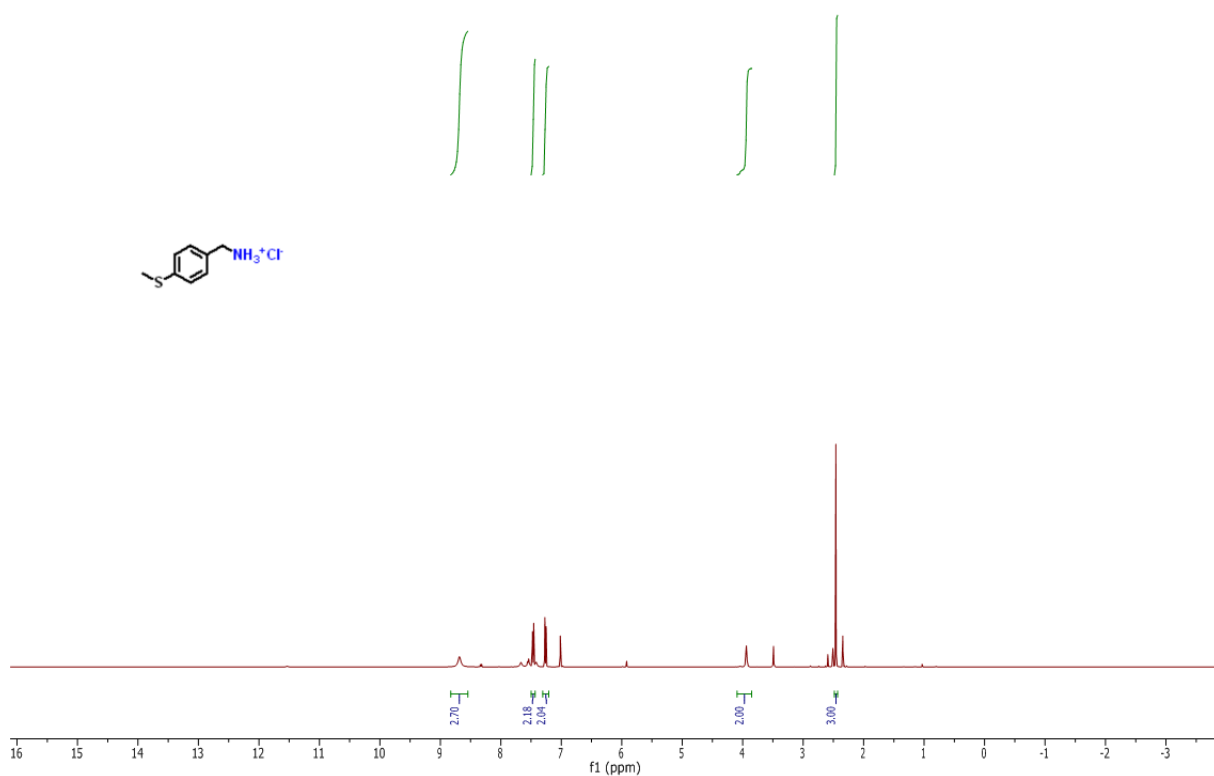

**Supplementary Figure 52.** <sup>1</sup>H NMR spectrum

1/0914.421.11.nd  
Kathir TMS-329  
Au13C DMSO {C:\Bruker\TopSpin3.5pl6} 1709 21

138.95  
130.94  
130.18  
126.19  
42.08  
15.11

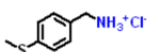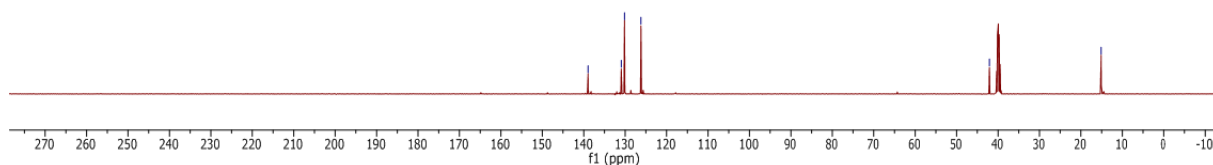

**Supplementary Figure 53.** <sup>13</sup>C NMR spectrum

1/1004.f321.10.fid  
Thiru TM5-227  
PROTON DMSO {C:\Bruker\TopSpin3.5pl6} 1710 21

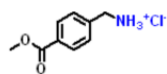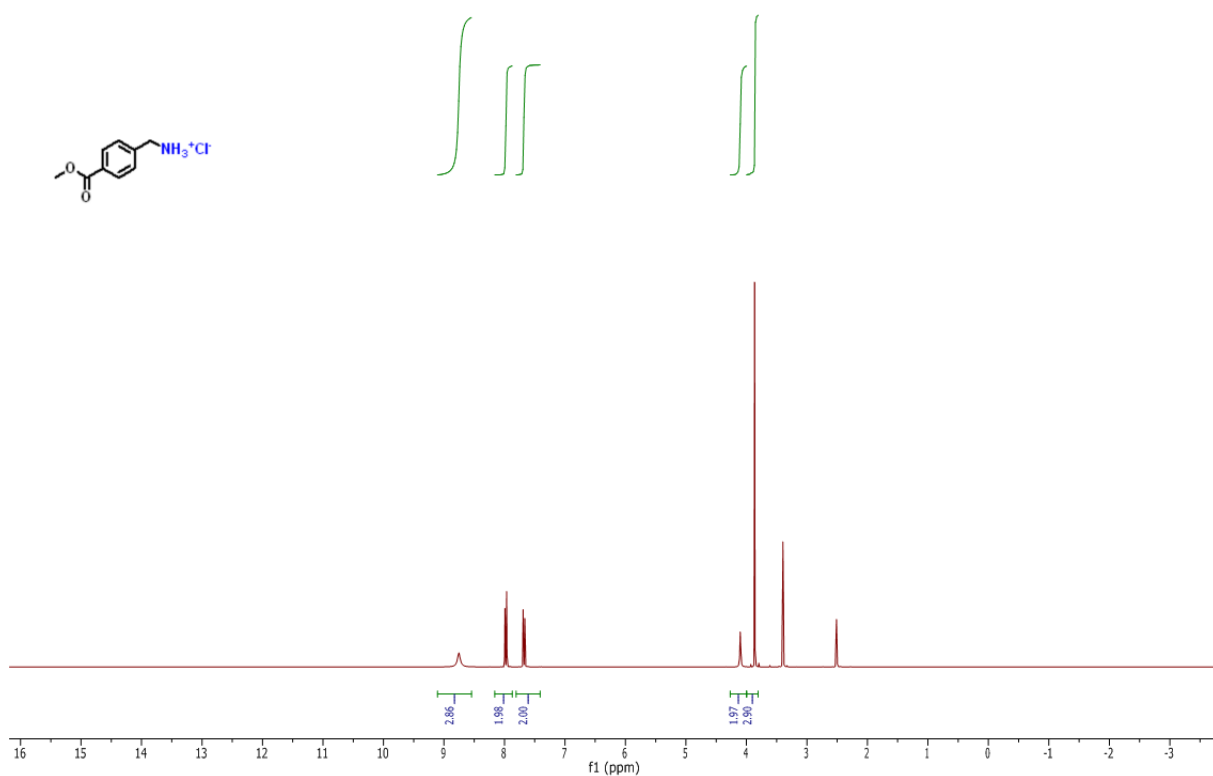

Supplementary Figure 54. <sup>1</sup>H NMR spectrum

1/1004.f321.11.fid  
Thiru TM5-227  
C13CPD DMSO {C:\Bruker\TopSpin3.5pl6} 1710 21

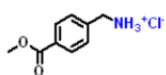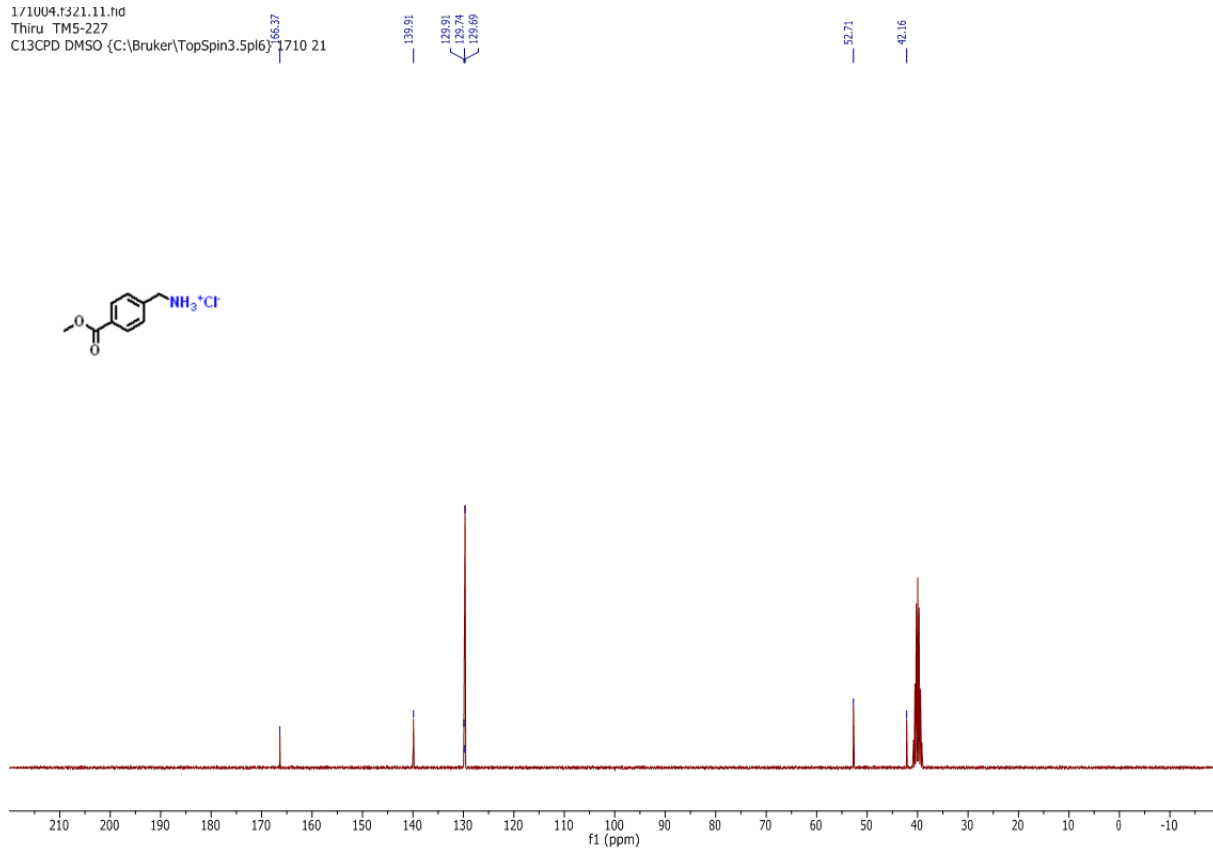

Supplementary Figure 55. <sup>13</sup>C NMR spectrum

1/1004.f317.10.fid  
Thiru\_TMS-194  
PROTON DMSO {C:\Bruker\TopSpin3.5pl6} 1710 17

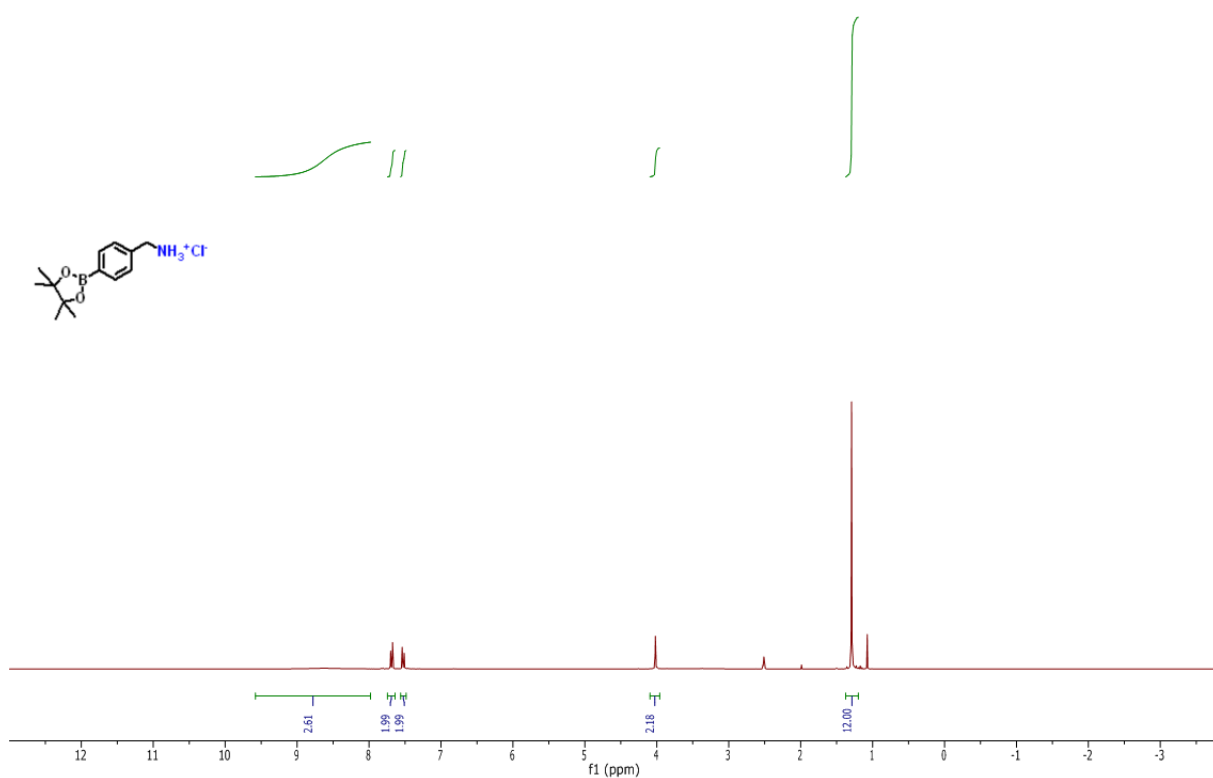

Supplementary Figure 56. <sup>1</sup>H NMR spectrum

1/1004.f317.11.fid  
Thiru\_TMS-194  
C13CPD DMSO {C:\Bruker\TopSpin3.5pl6} 1710 17

137.82  
134.95  
134.73  
128.79  
84.21  
42.52  
25.13

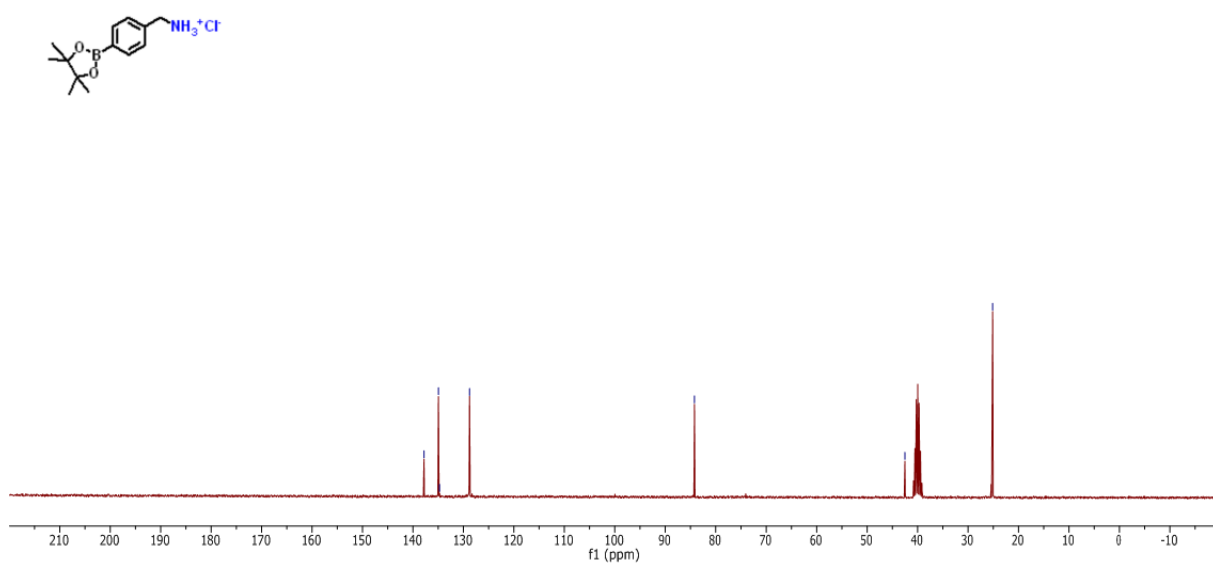

Supplementary Figure 57. <sup>13</sup>C NMR spectrum

170913.f340.10.fid  
Thiru\_TMS-230  
PROTON DMSO {C:\Bruker\TopSpin3.5pl6} 1709 40

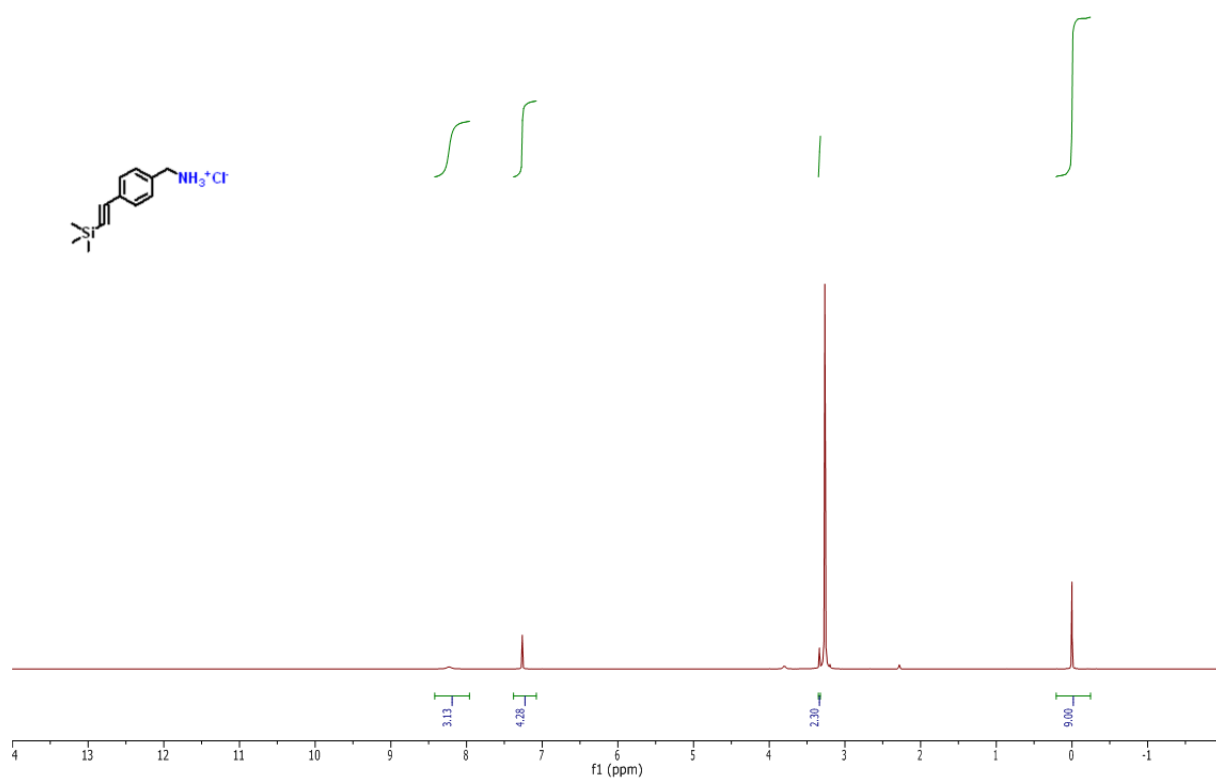

Supplementary Figure 58. <sup>1</sup>H NMR spectrum

170913.f340.11.fid  
Thiru\_TMS-230  
C13CPD DMSO {C:\Bruker\TopSpin3.5pl6} 1709 40

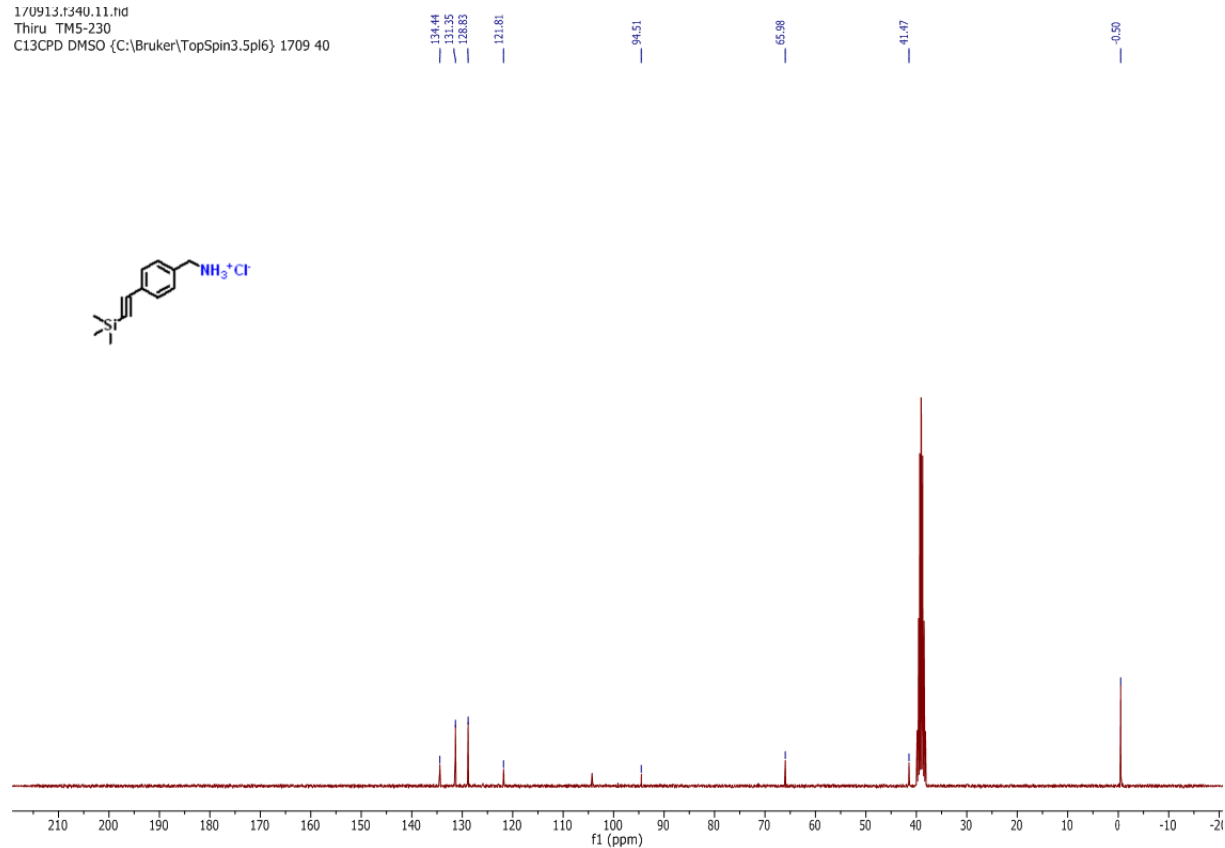

Supplementary Figure 59. <sup>13</sup>C NMR spectrum

1/0922.f334.10.fid  
Thiru/ TM5-336  
PROTON DMSO {C:\Bruker\TopSpin3.5pl6} 1709 34

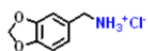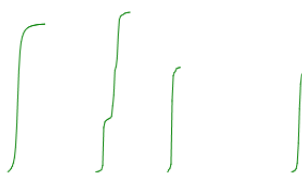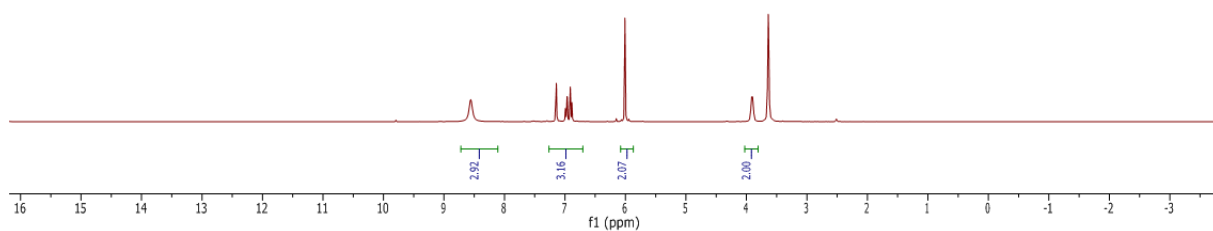

**Supplementary Figure 60.** <sup>1</sup>H NMR spectrum

1/0922.f334.11.fid  
Thiru/ TM5-336  
C13CPD DMSO {C:\Bruker\TopSpin3.5pl6} 1709 34

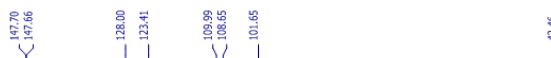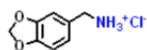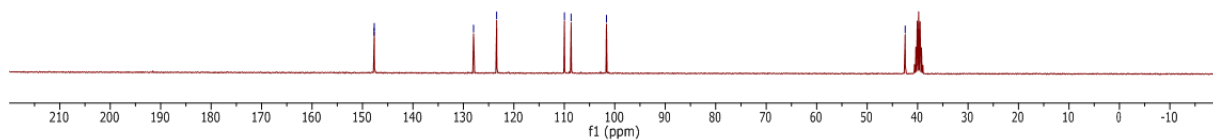

**Supplementary Figure 61.** <sup>13</sup>C NMR spectrum

170913.1338.10.fid  
Thiru TM5-183  
PROTON DMSO {C:\Bruker\TopSpin3.5pl6} 1709 38

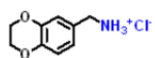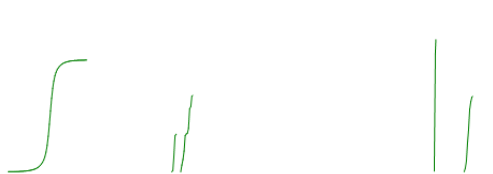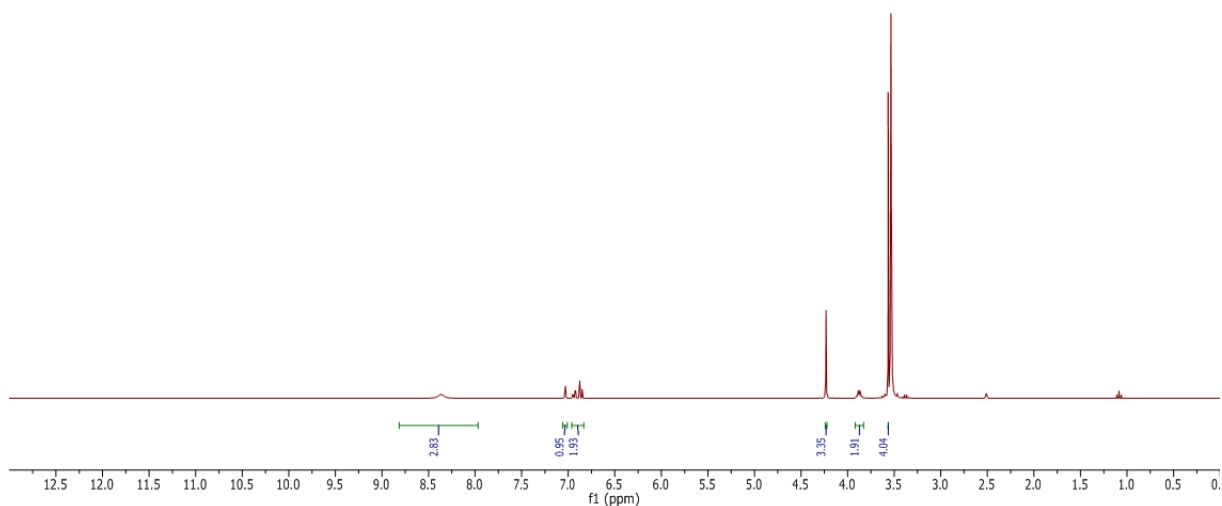

**Supplementary Figure 62.**  $^1\text{H}$  NMR spectrum

170913.1338.11.fid  
Thiru TM5-183  
C13CPD DMSO {C:\Bruker\TopSpin3.5pl6} 1709 38

143.98  
143.62

127.30  
123.63  
118.34  
117.53

64.53

42.15

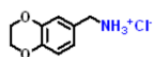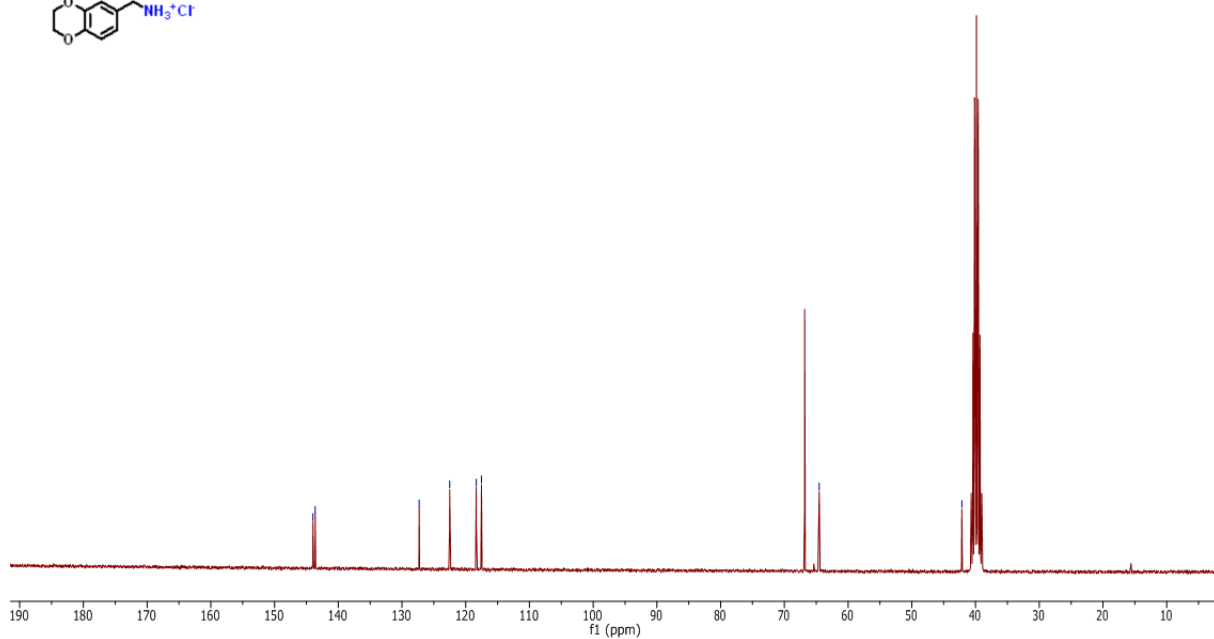

**Supplementary Figure 63.**  $^{13}\text{C}$  NMR spectrum

1/0922.f342.10.fid  
Thiru/ TM5-353  
PROTON DMSO {C:\Bruker\TopSpin3.5pl6} 1709 42

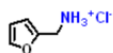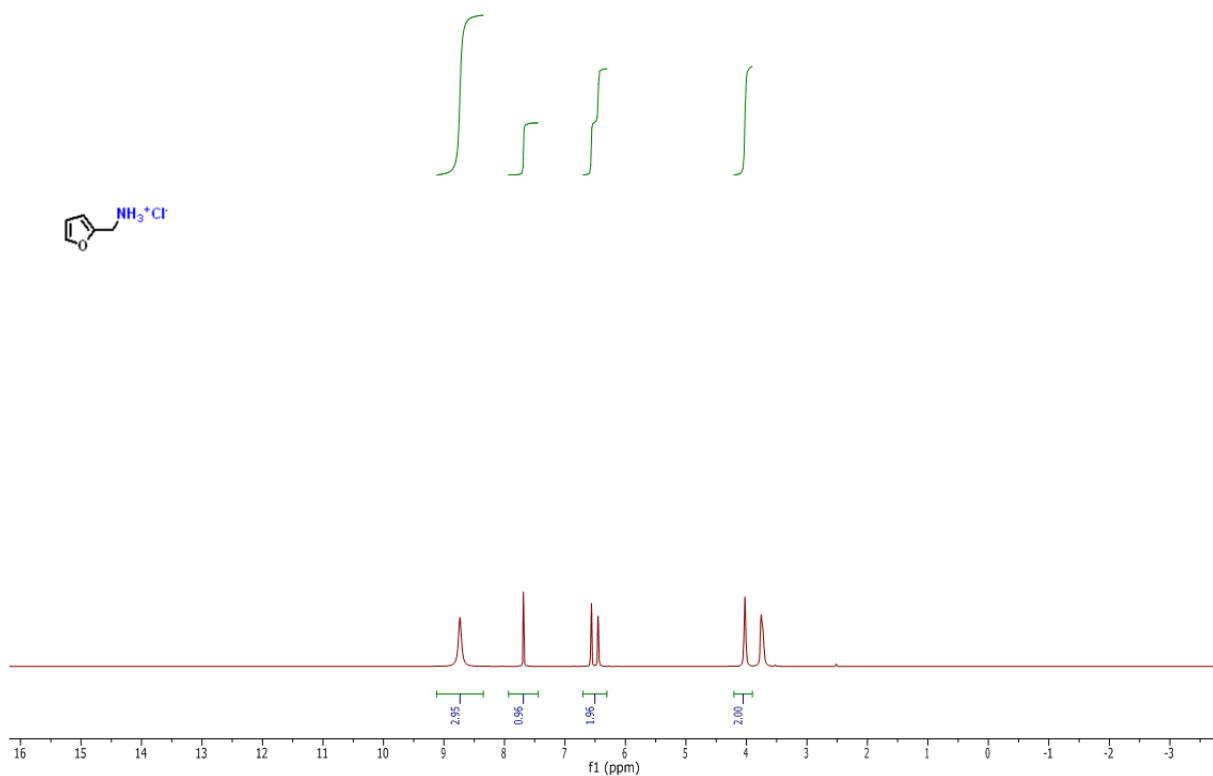

**Supplementary Figure 64.** <sup>1</sup>H NMR spectrum

1/0922.f342.11.fid  
Thiru/ TM5-353  
C13CPD DMSO {C:\Bruker\TopSpin3.5pl6} 1709 42

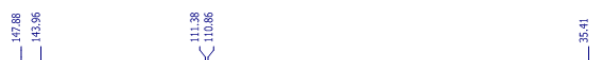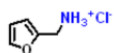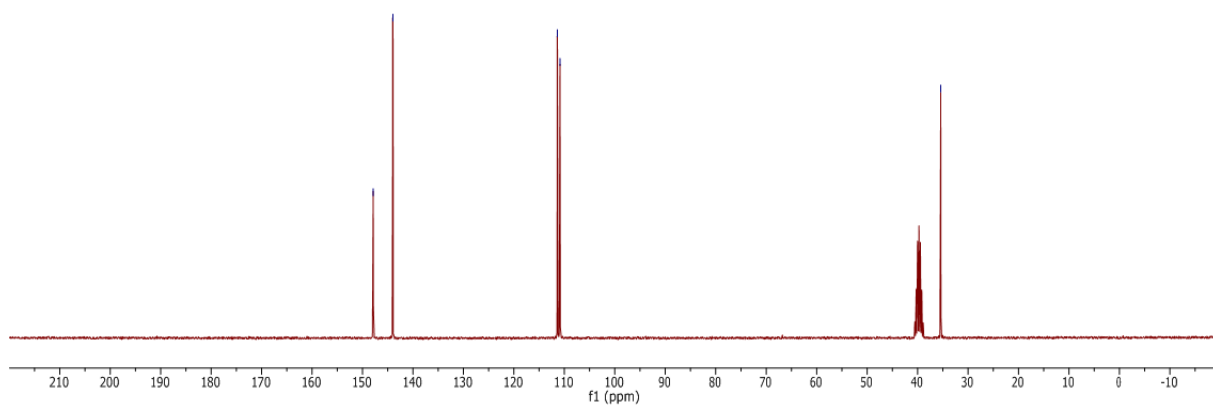

**Supplementary Figure 65.** <sup>13</sup>C NMR spectrum



171004.f323.10.fid  
Thiru TMS-196  
PROTON DMSO {C:\Bruker\TopSpin3.5pl6} 1710 23

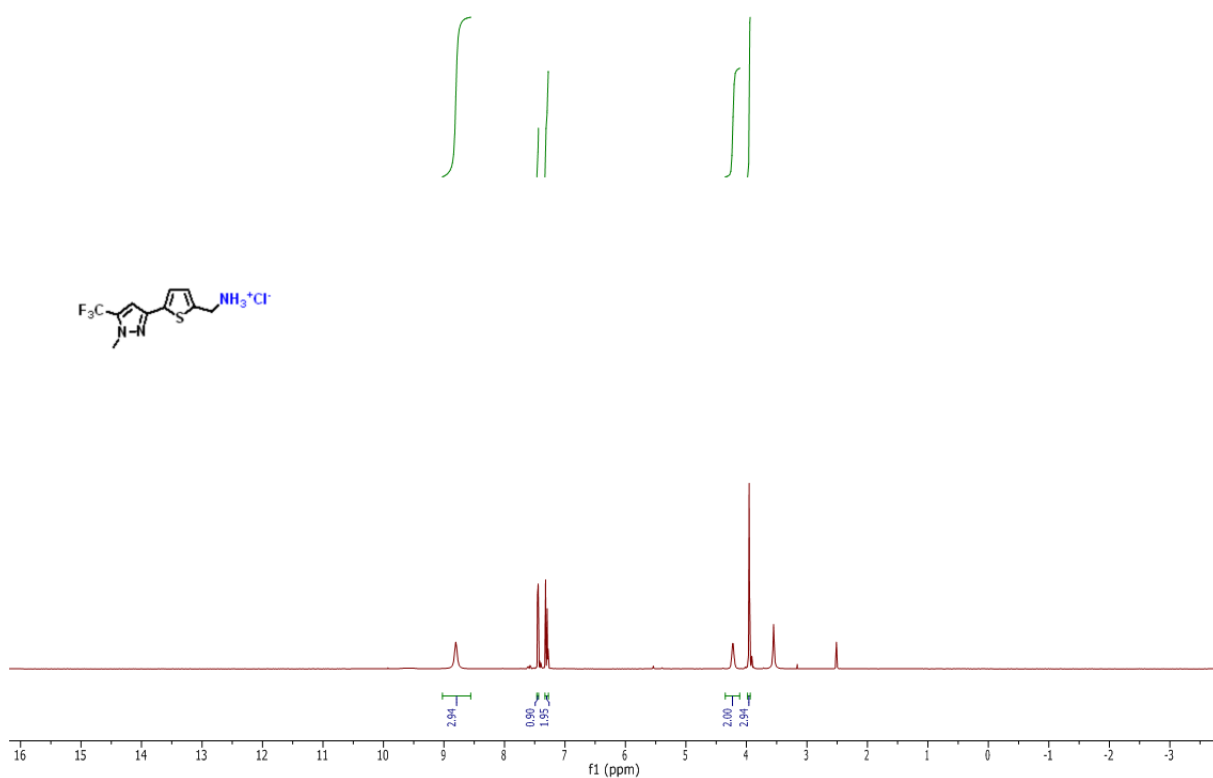

Supplementary Figure 66.  $^1\text{H}$  NMR spectrum

171004.f323.11.fid  
Thiru TMS-196  
C13CPD DMSO {C:\Bruker\TopSpin3.5pl6} 1710 23

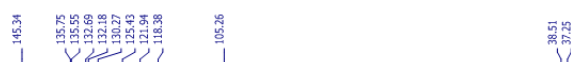

Supplementary Figure 67.  $^{13}\text{C}$  NMR spectrum

1/1004.f322.10.fid  
Thiru TM5-191  
PROTON DMSO {C:\Bruker\TopSpin3.5pl6} 1710 22

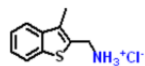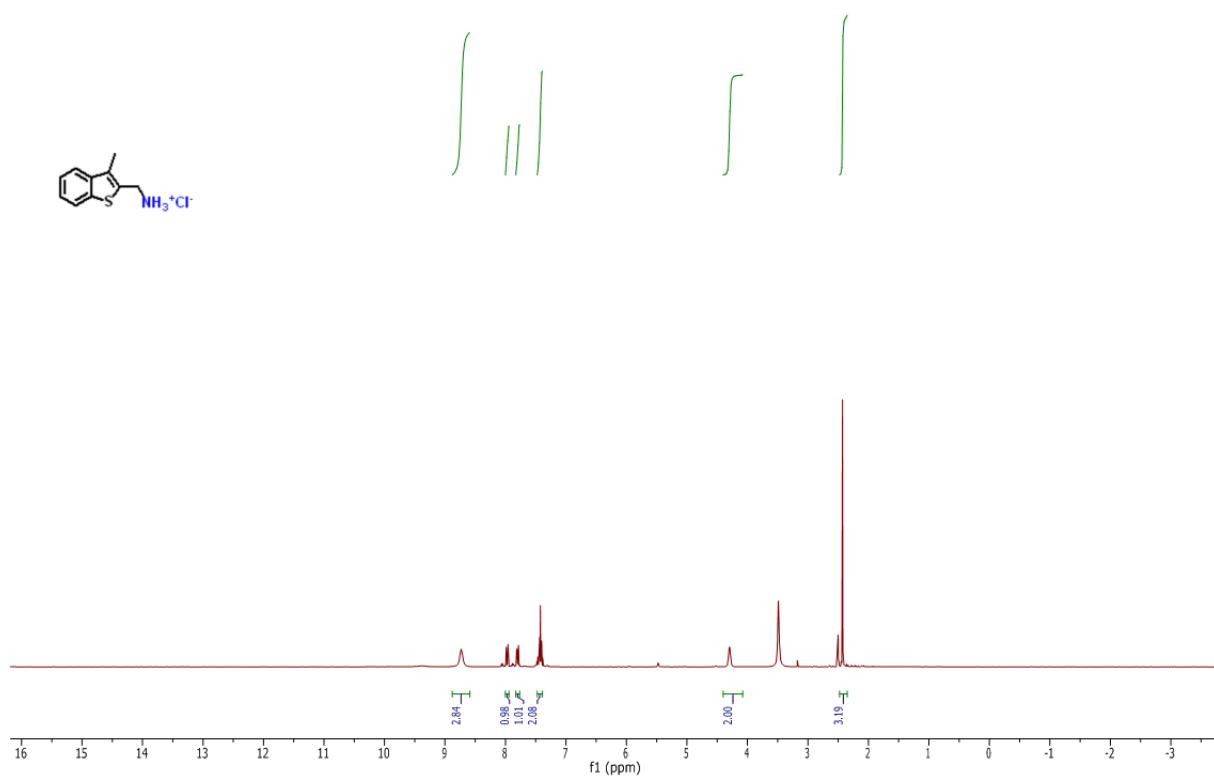

1/1004.f322.11.fid  
Thiru TM5-191  
C13CPD DMSO {C:\Bruker\TopSpin3.5pl6} 1710 22

138.57  
136.09  
132.62  
130.15  
128.72  
124.87  
122.99  
122.94

35.65

12.10

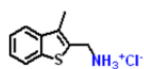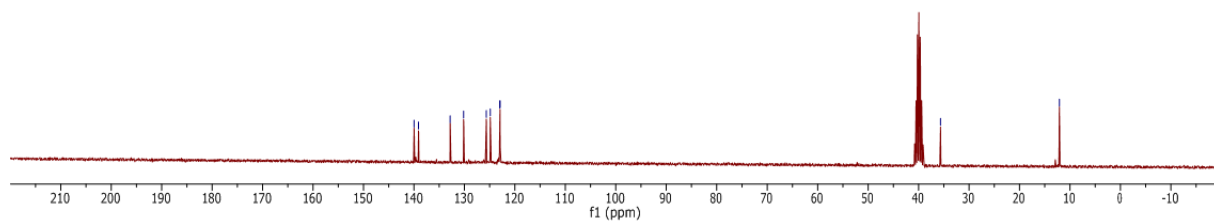

170922.f346.10.fid  
Thiru/ TM5-195  
PROTON DMSO {C:\Bruker\TopSpin3.5pl6} 1709 46

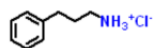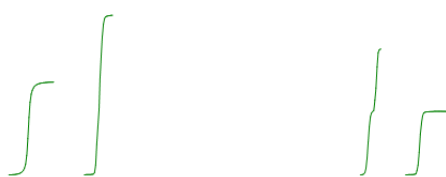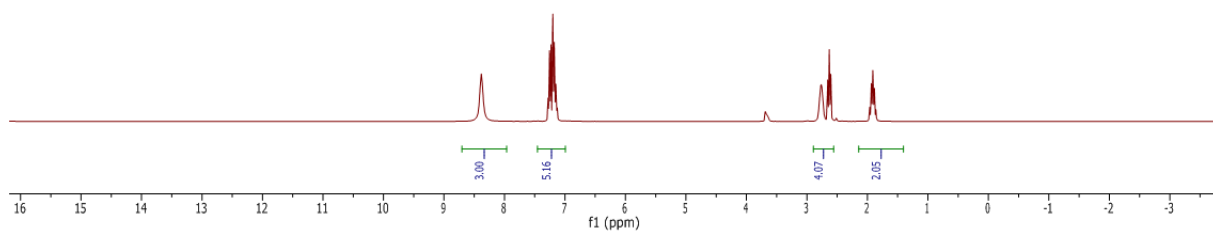

**Supplementary Figure 70.** <sup>1</sup>H NMR spectrum

170922.f346.11.fid  
Thiru/ TM5-195  
C13CPD DMSO {C:\Bruker\TopSpin3.5pl6} 1709 46

141.35

128.82  
128.71  
126.41

38.79

32.38  
29.10

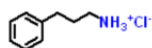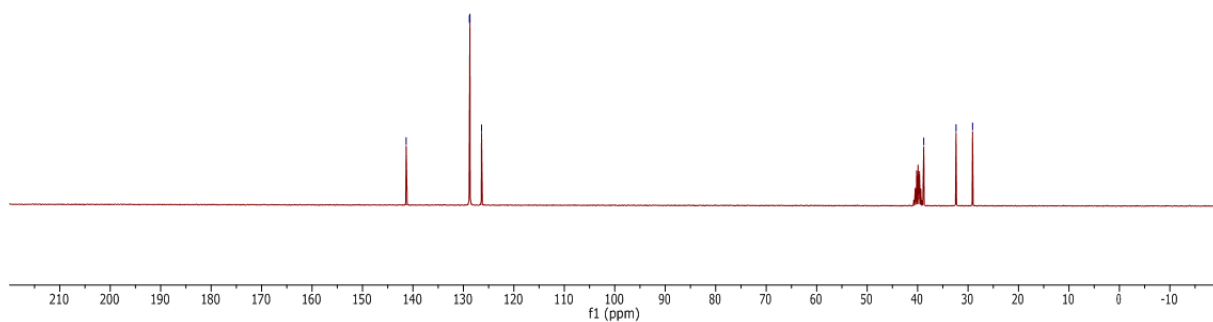

**Supplementary Figure 71.** <sup>13</sup>C NMR spectrum

1/1004.f318.10.fid  
Thiru TM5-211  
PROTON DMSO {C:\Bruker\TopSpin3.5pl6} 1710 18

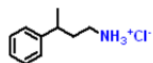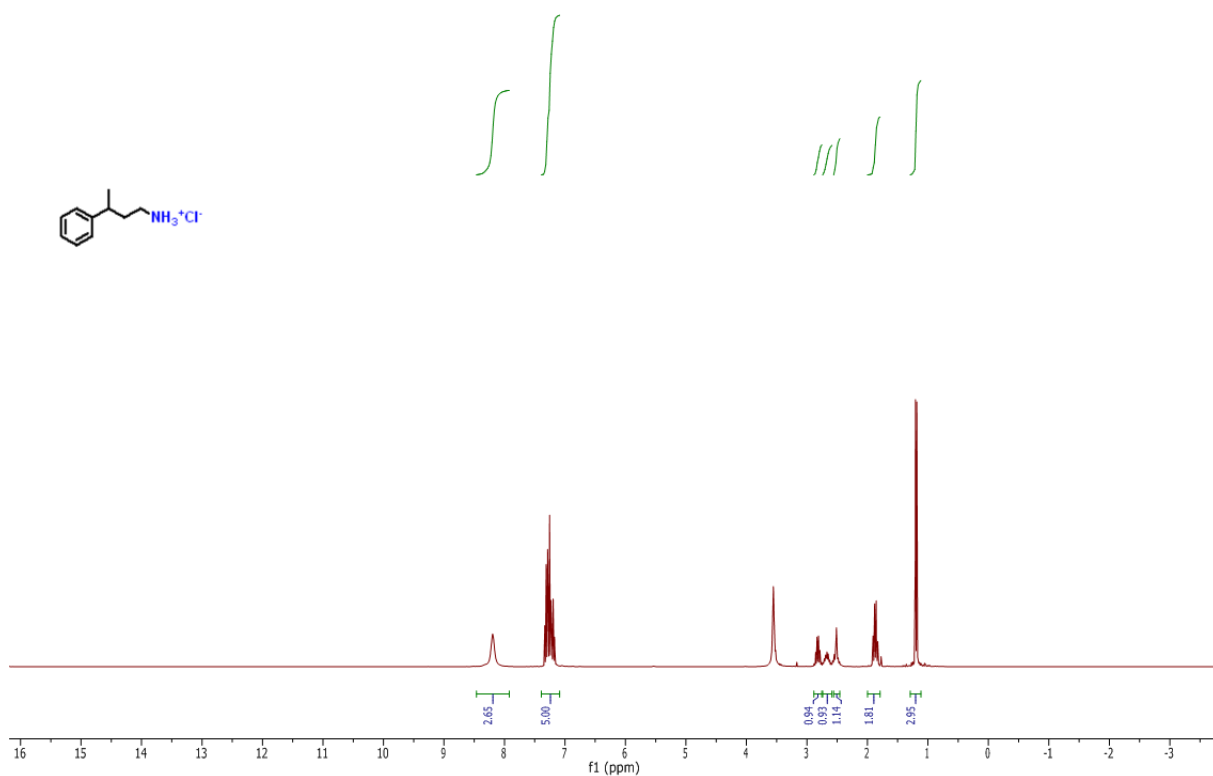

Supplementary Figure 72. <sup>1</sup>H NMR spectrum

1/1004.f318.11.fid  
Thiru TM5-211  
C13CPD DMSO {C:\Bruker\TopSpin3.5pl6} 1710 18

146.30  
128.94  
127.25  
126.69  
37.79  
36.85  
35.45  
22.49

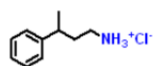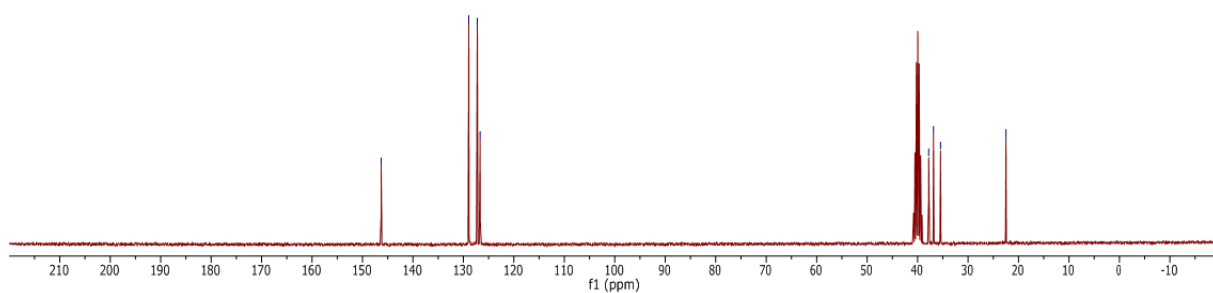

Supplementary Figure 73. <sup>13</sup>C NMR spectrum

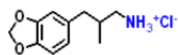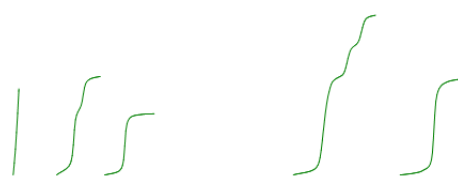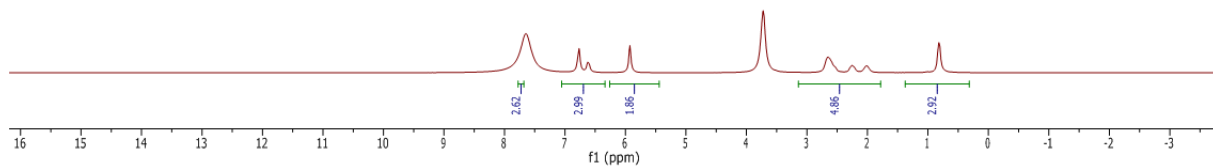

**Supplementary Figure 74.** <sup>1</sup>H NMR spectrum

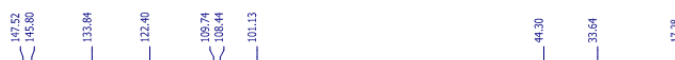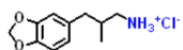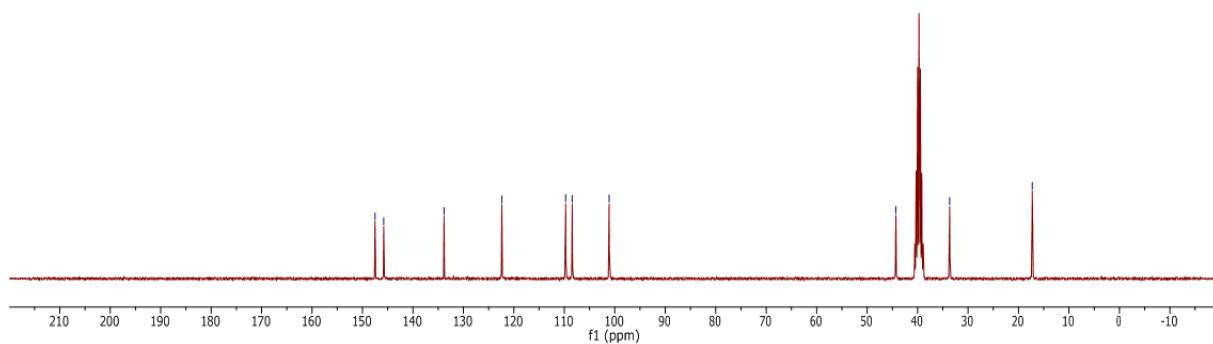

**Supplementary Figure 75.** <sup>13</sup>C NMR spectrum

1/1005.402.10.nd  
Thiru TMS-247  
Au1H DMSO {C:\Bruker\TopSpin3.5pl6} 1710 2

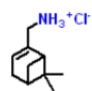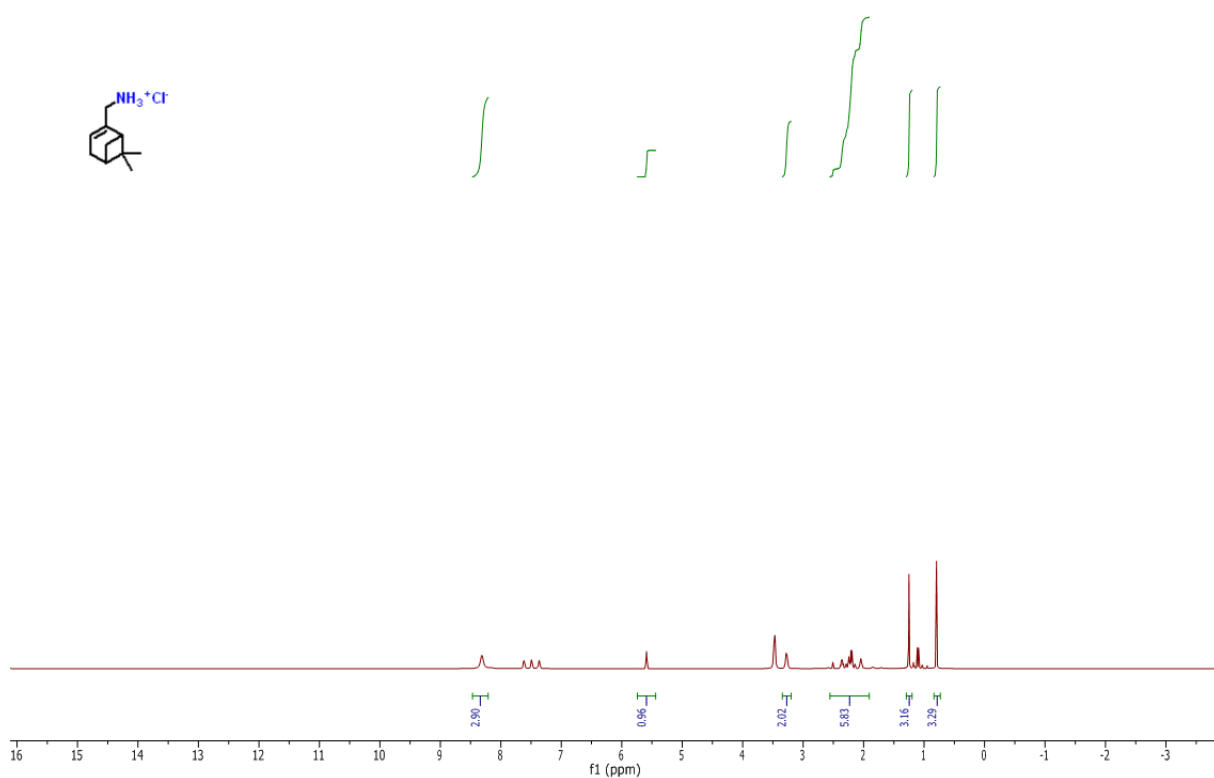

**Supplementary Figure 76.** <sup>1</sup>H NMR spectrum

1/1005.402.11.nd  
Thiru TMS-247  
Au13C DMSO {C:\Bruker\TopSpin3.5pl6} 1710 2

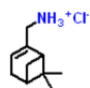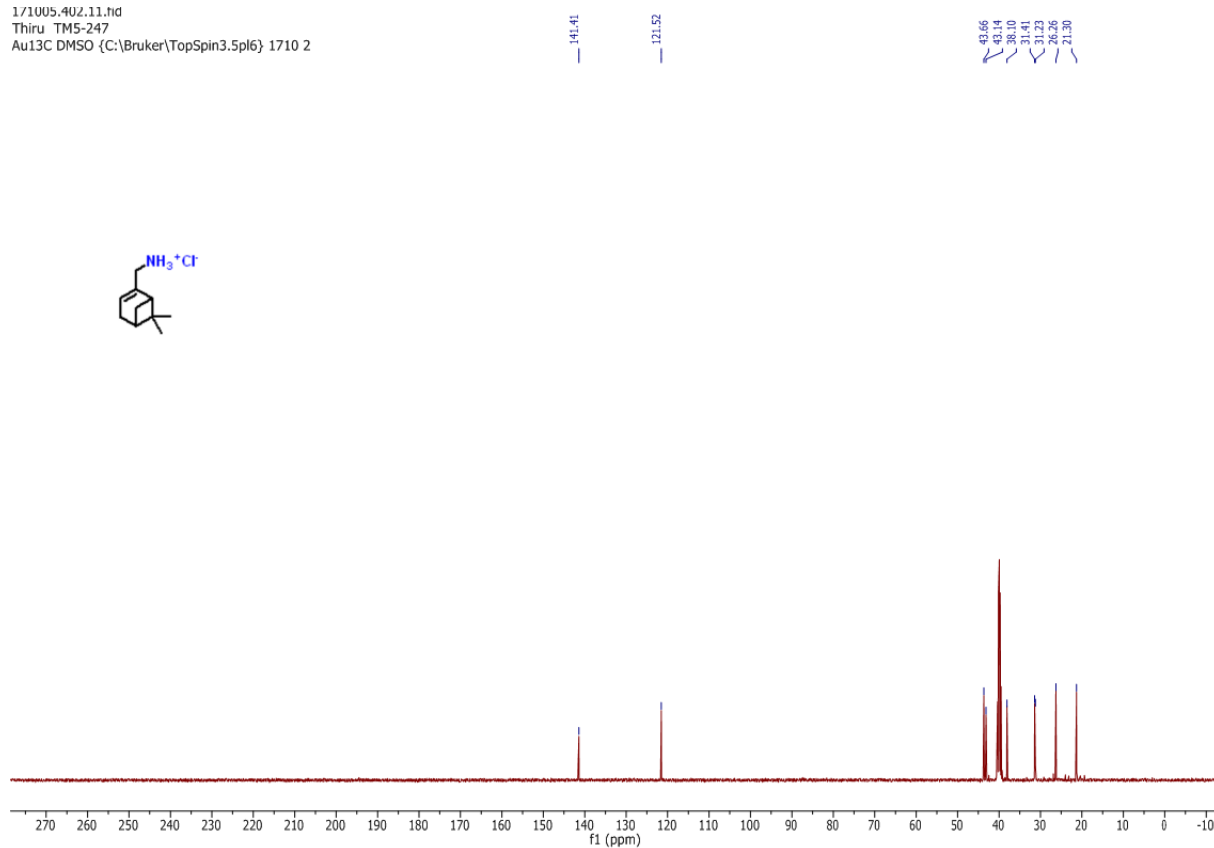

**Supplementary Figure 77.** <sup>13</sup>C NMR spectrum

1/1005.407.10.nd  
Thiru TMS-327  
Au1H DMSO {C:\Bruker\TopSpin3.5pl6} 1710 7

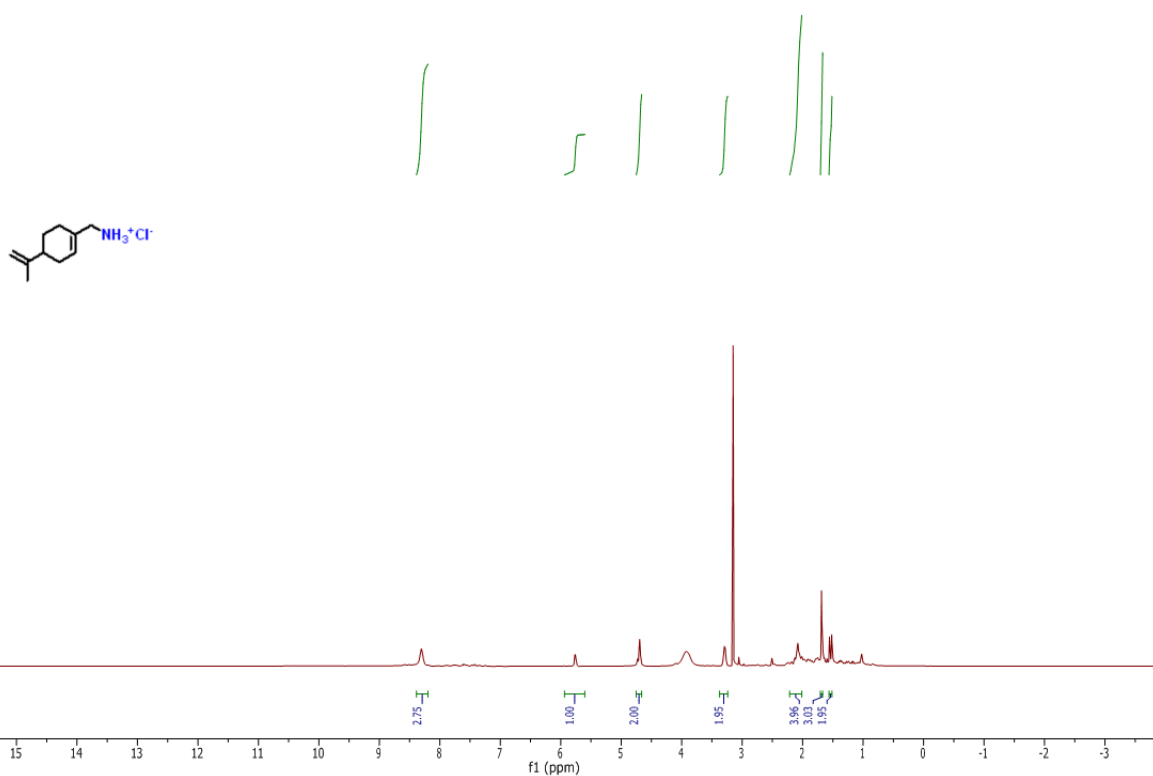

Supplementary Figure 78. <sup>1</sup>H NMR spectrum

1/1005.407.11.nd  
Thiru TMS-327  
Au13C DMSO {C:\Bruker\TopSpin3.5pl6} 1710 7

149.31  
131.23  
125.94  
109.47  
48.98  
44.07  
30.79  
27.22  
27.01  
21.02

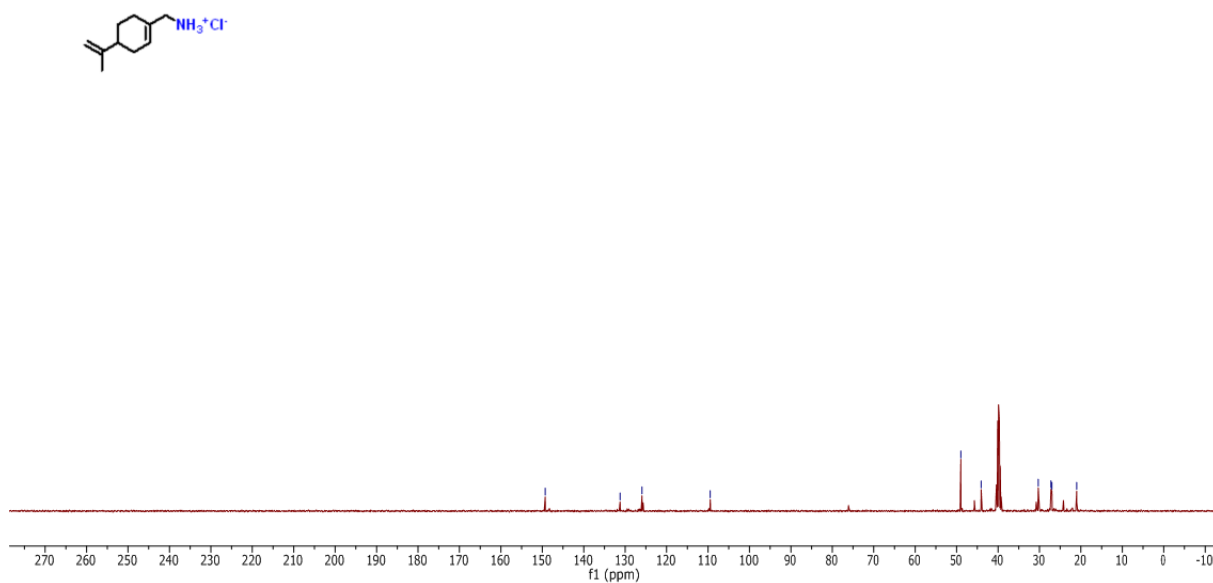

Supplementary Figure 79. <sup>13</sup>C NMR spectrum

170925.f340.10.fid  
Thiru TMS-283  
PROTON DMSO {C:\Bruker\TopSpin3.5pl6} 1709 40

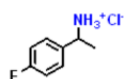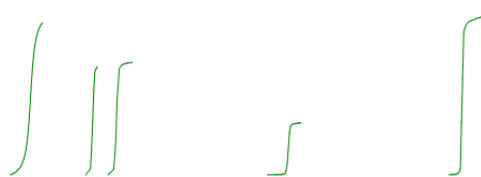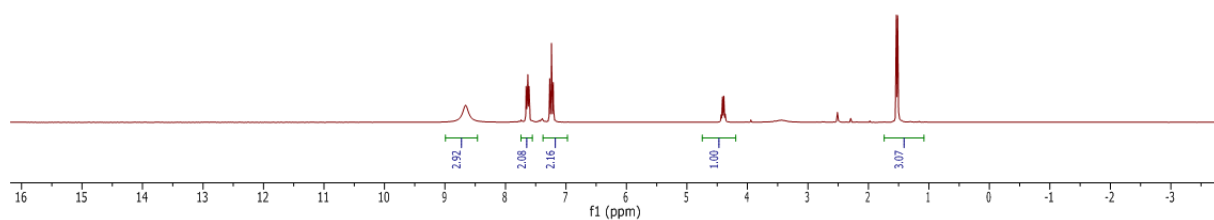

Supplementary Figure 80.  $^1\text{H}$  NMR spectrum

170925.f340.11.fid  
Thiru TMS-283  
C13CPD DMSO {C:\Bruker\TopSpin3.5pl6} 1709 40

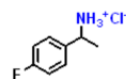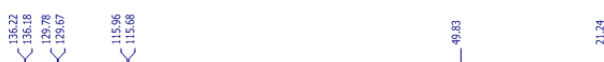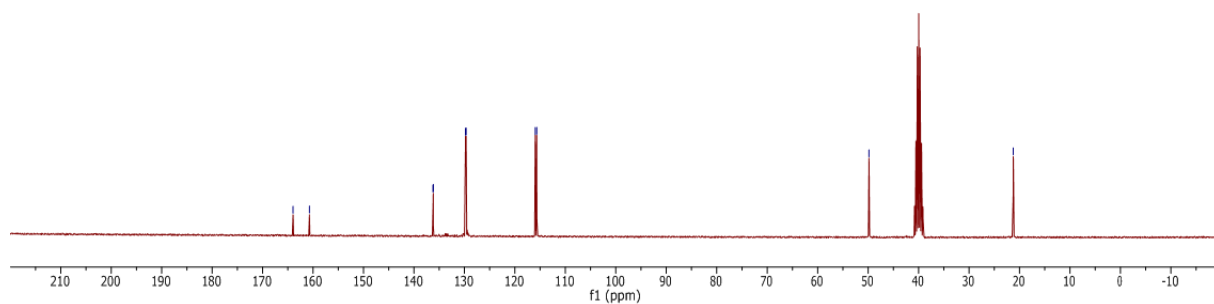

Supplementary Figure 81.  $^{13}\text{C}$  NMR spectrum



170922.f337.110.tif  
Thiru/ TM5-337  
PROTON DMSO {C:\Bruker\TopSpin3.5pl6} 1709 37

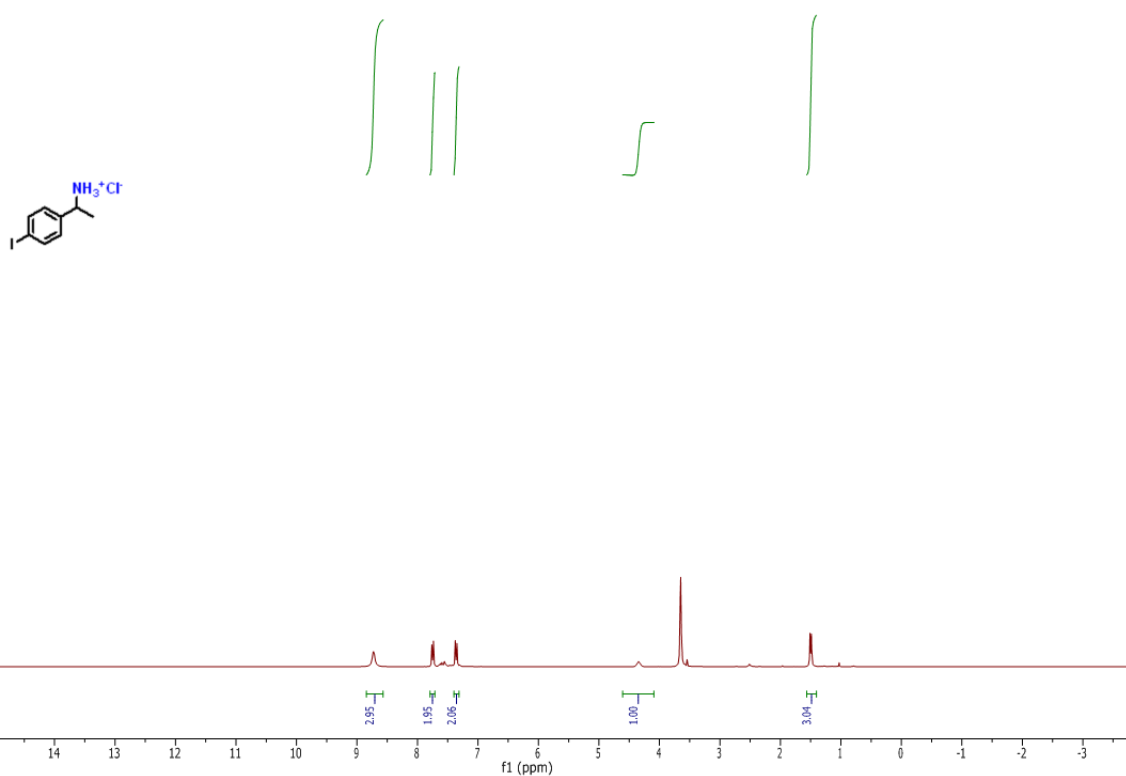

170922.f337.111.tif  
Thiru/ TM5-337  
C13CPD DMSO {C:\Bruker\TopSpin3.5pl6} 1709 37

139.47  
137.80  
128.78  
95.24  
50.09  
21.03

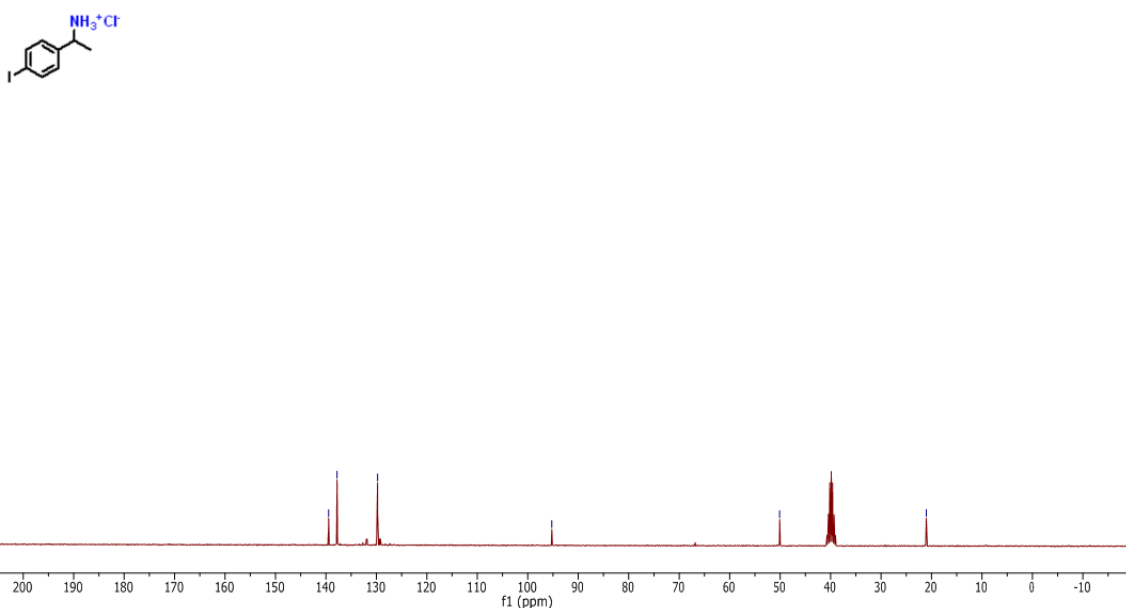

1/0922.f336.10.fid  
Thiru/ TM5-338  
PROTON DMSO {C:\Bruker\TopSpin3.5pl6} 1709 36

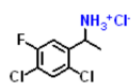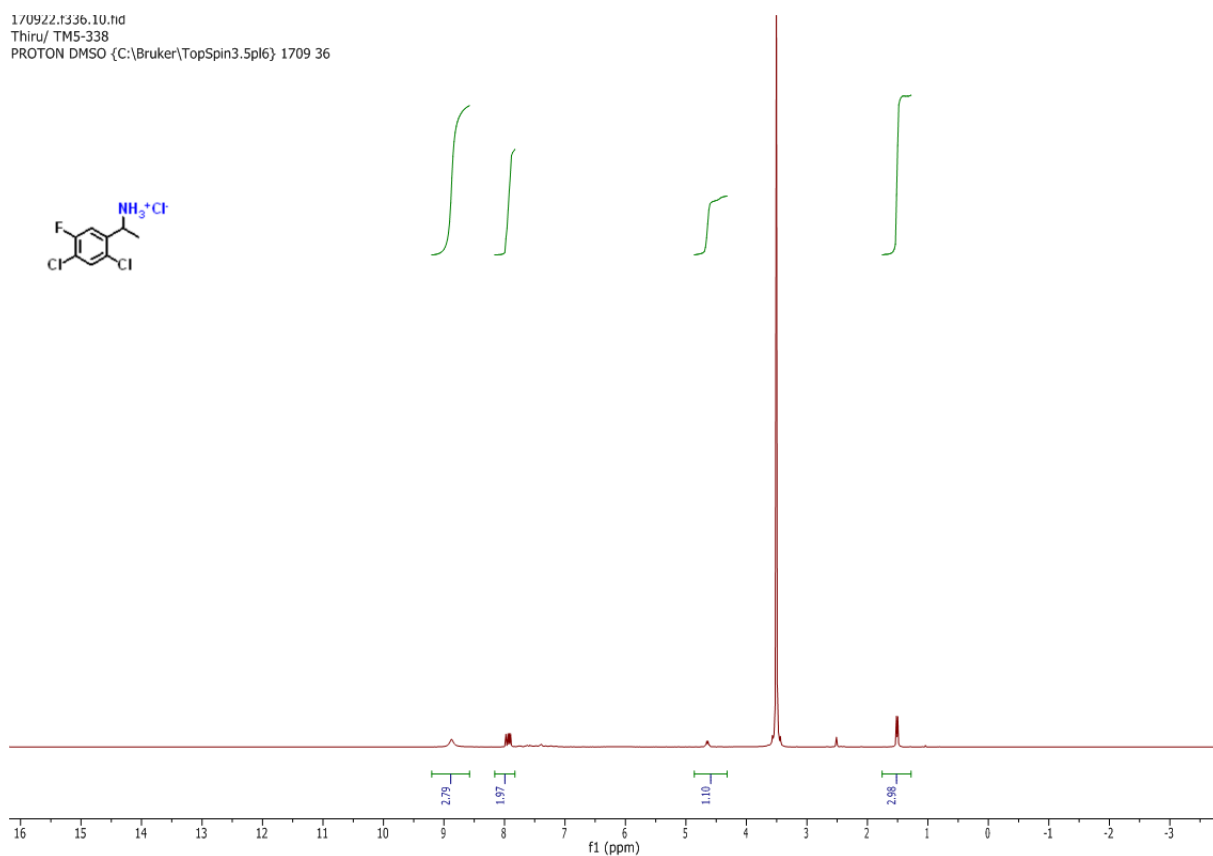

Supplementary Figure 84. <sup>1</sup>H NMR spectrum

1/0922.f336.11.fid  
Thiru/ TM5-338  
C13CPD DMSO {C:\Bruker\TopSpin3.5pl6} 1709 36

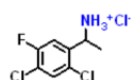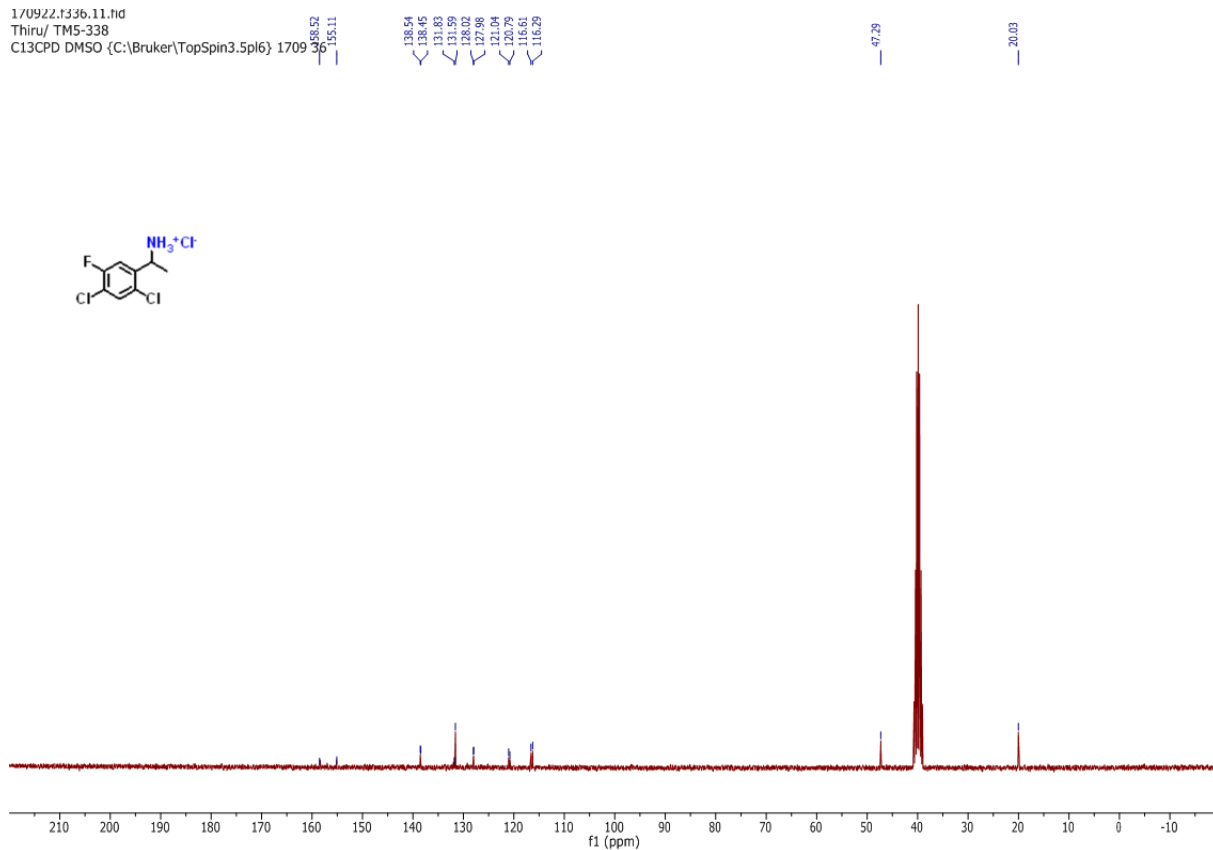

Supplementary Figure 85. <sup>13</sup>C NMR spectrum

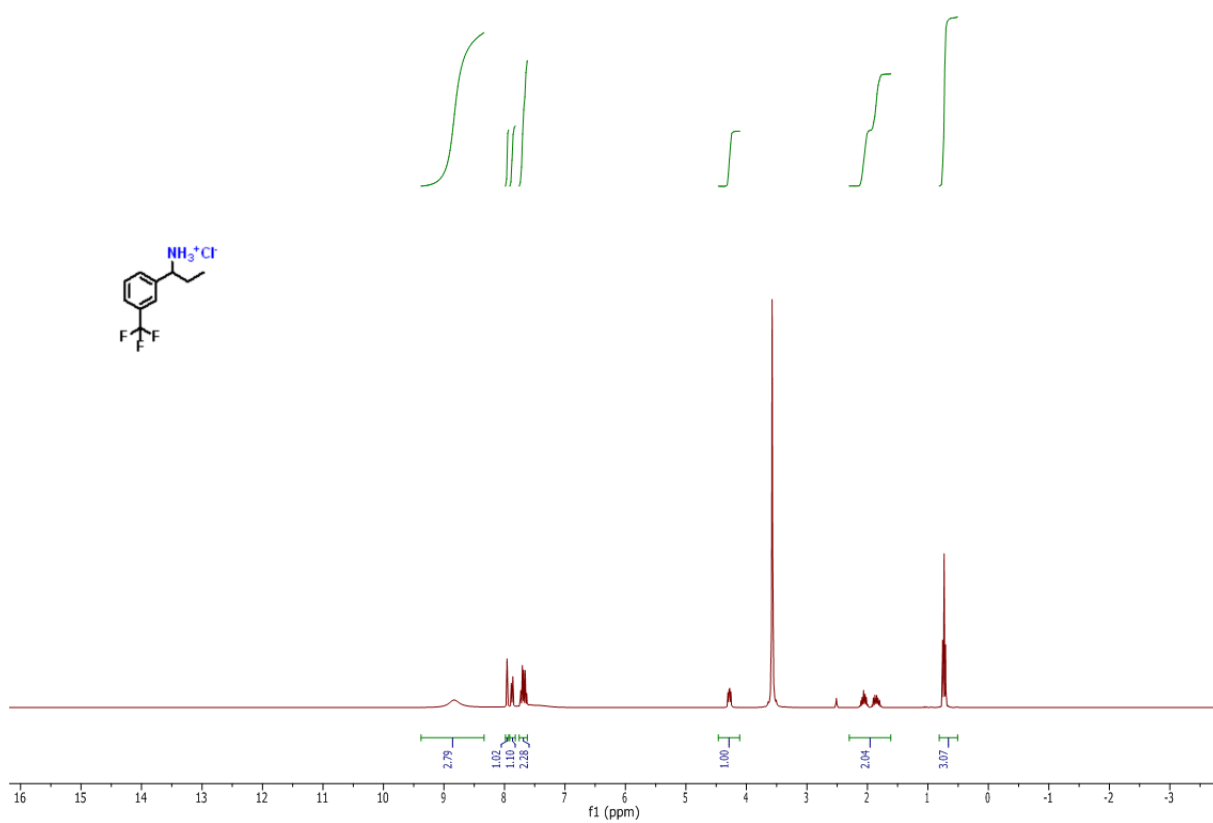

Supplementary Figure 86.  $^1\text{H}$  NMR spectrum

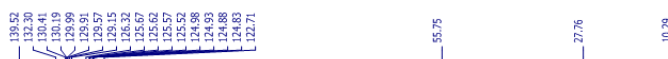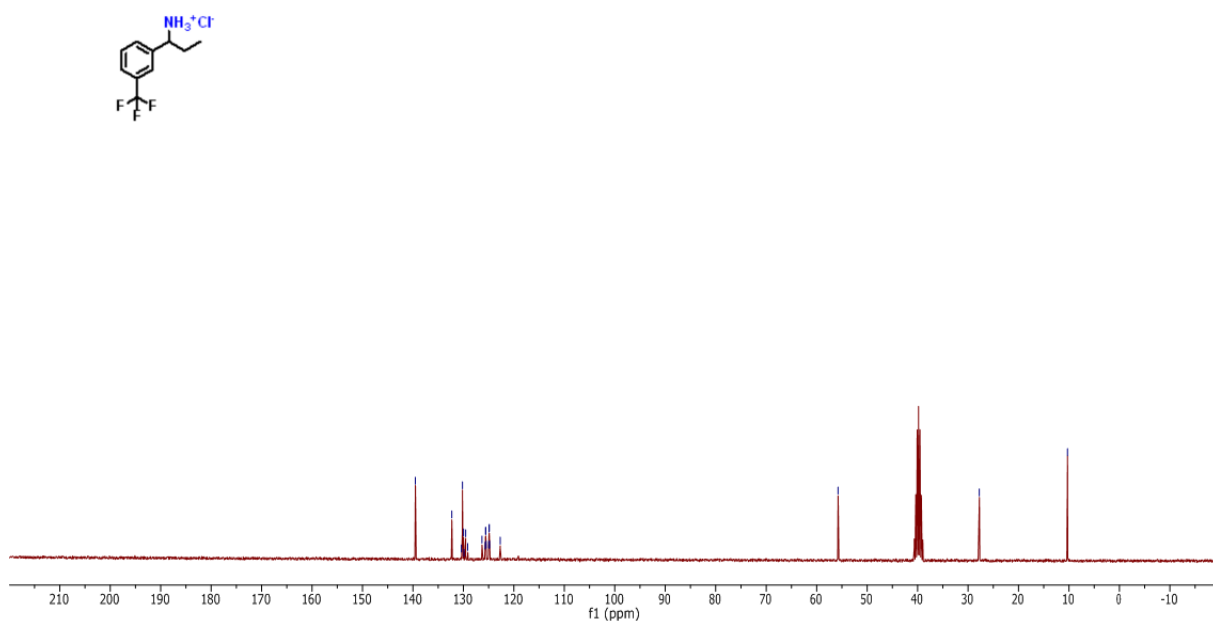

Supplementary Figure 87.  $^{13}\text{C}$  NMR spectrum

1/0922.f332.10.fid  
Thiru/ TM5-362  
PROTON DMSO {C:\Bruker\TopSpin3.5pl6} 1709 32

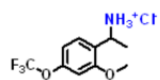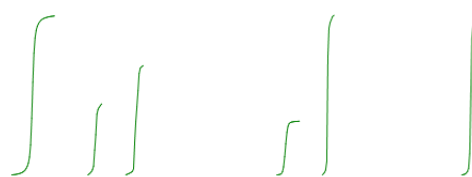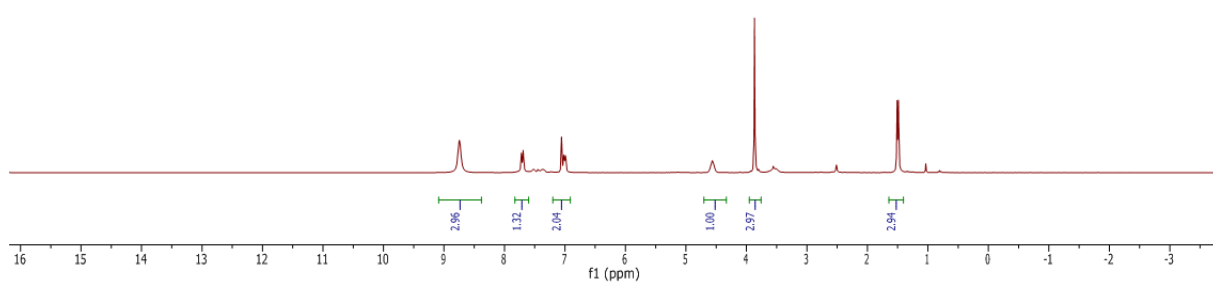

Supplementary Figure 88. <sup>1</sup>H NMR spectrum

1/0922.f332.11.fid  
Thiru/ TM5-362  
C13CPD DMSO {C:\Bruker\TopSpin3.5pl6} 1709 32

157.73 149.58 126.89 126.84 125.59 122.19 118.79 115.40 112.81 105.36 56.75 44.52 19.63

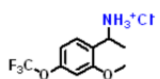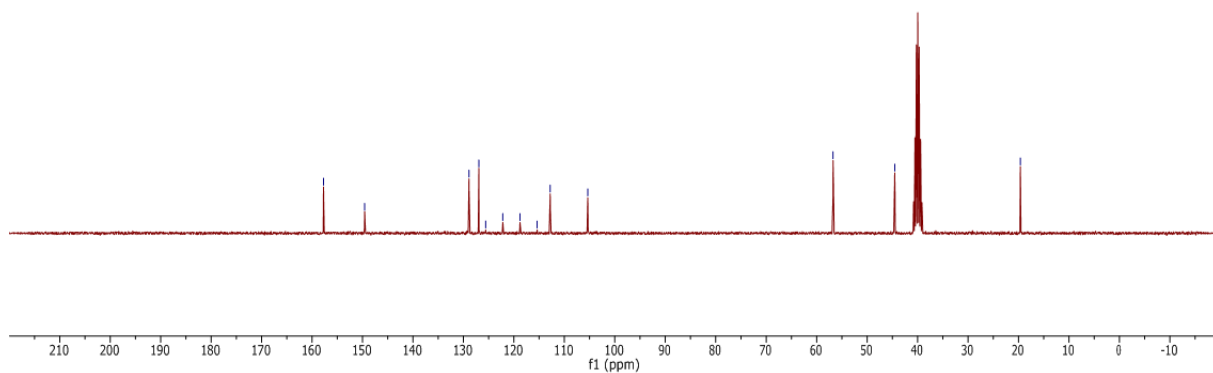

Supplementary Figure 90. <sup>13</sup>C NMR spectrum

1/0918.f328.10.fid  
Thiru/ TM5-265  
PROTON DMSO {C:\Bruker\TopSpin3.5pl6} 1709 28

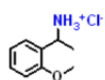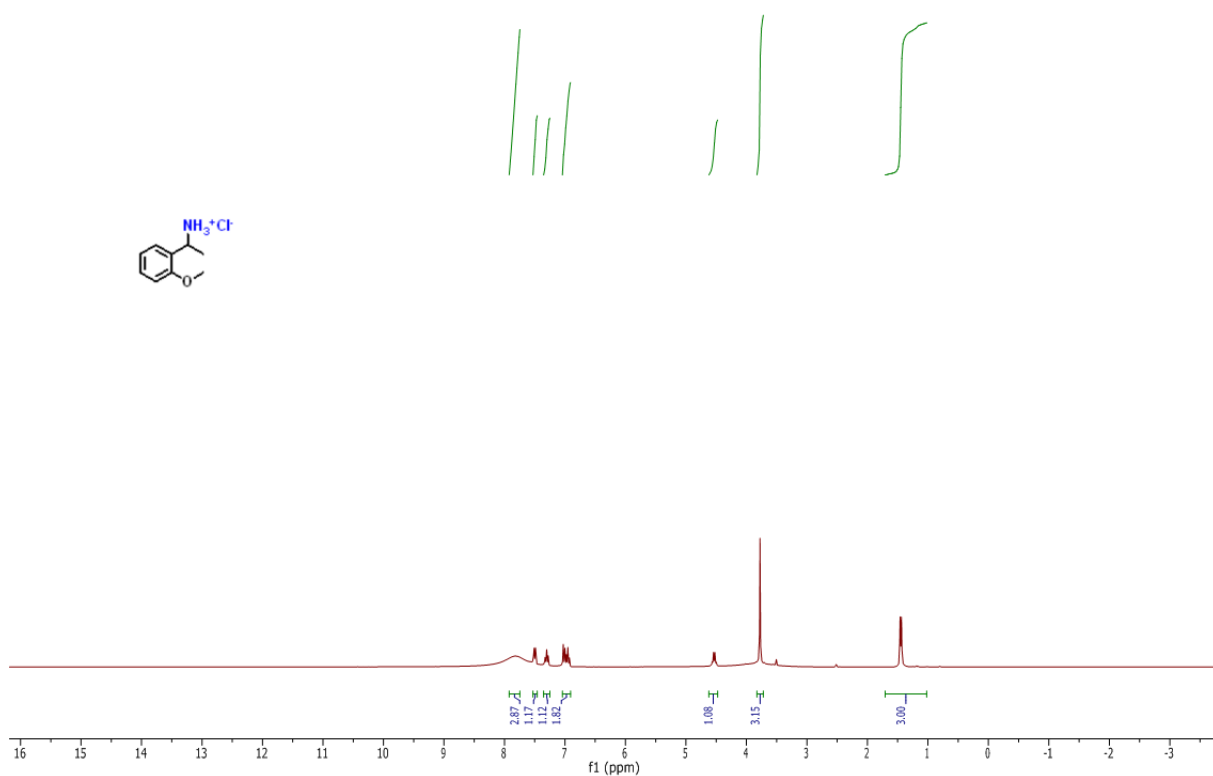

**Supplementary Figure 91.**  $^1\text{H}$  NMR spectrum

1/0918.f328.11.fid  
Thiru/ TM5-265  
C13CPD DMSO {C:\Bruker\TopSpin3.5pl6} 1709 28

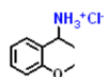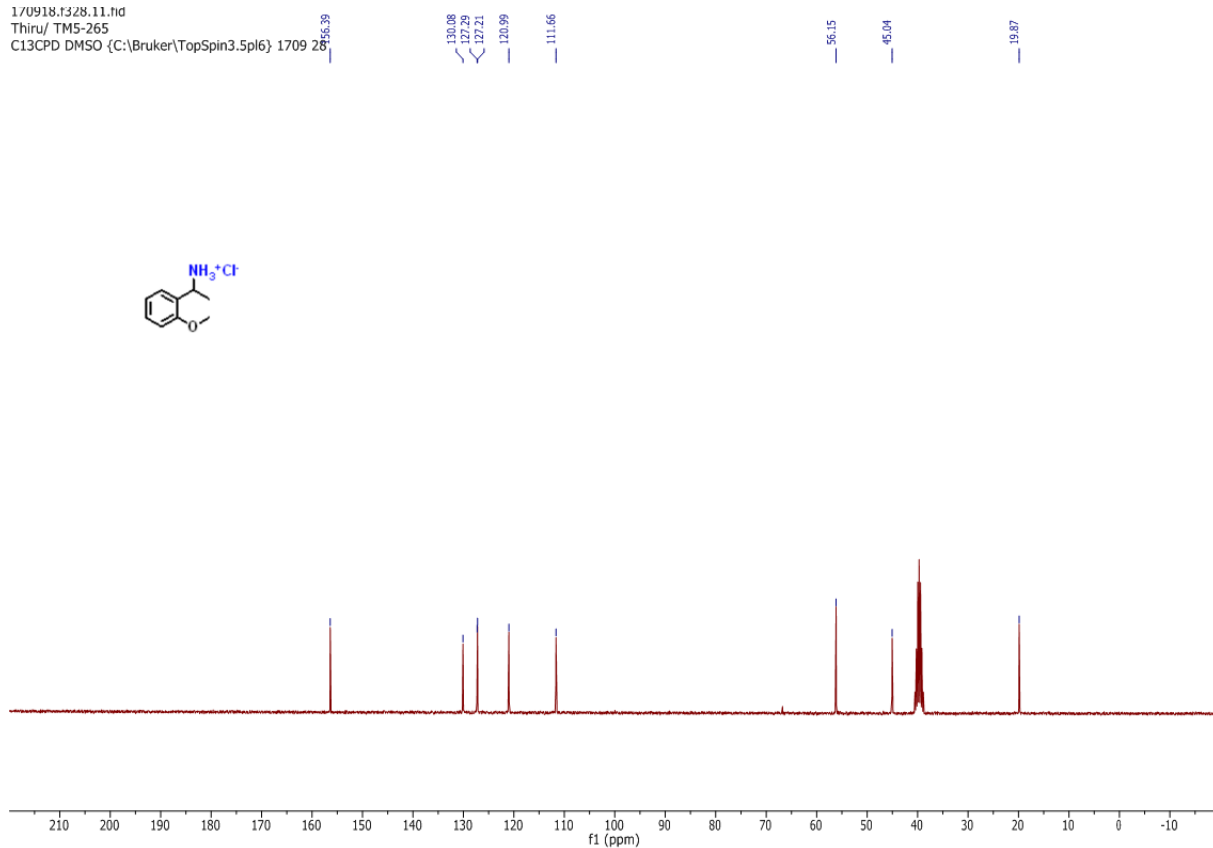

**Supplementary Figure 92.**  $^{13}\text{C}$  NMR spectrum

1/1004.f325.10.fid  
Thiru TM5-289  
PROTON DMSO {C:\Bruker\TopSpin3.5pl6} 1710 25

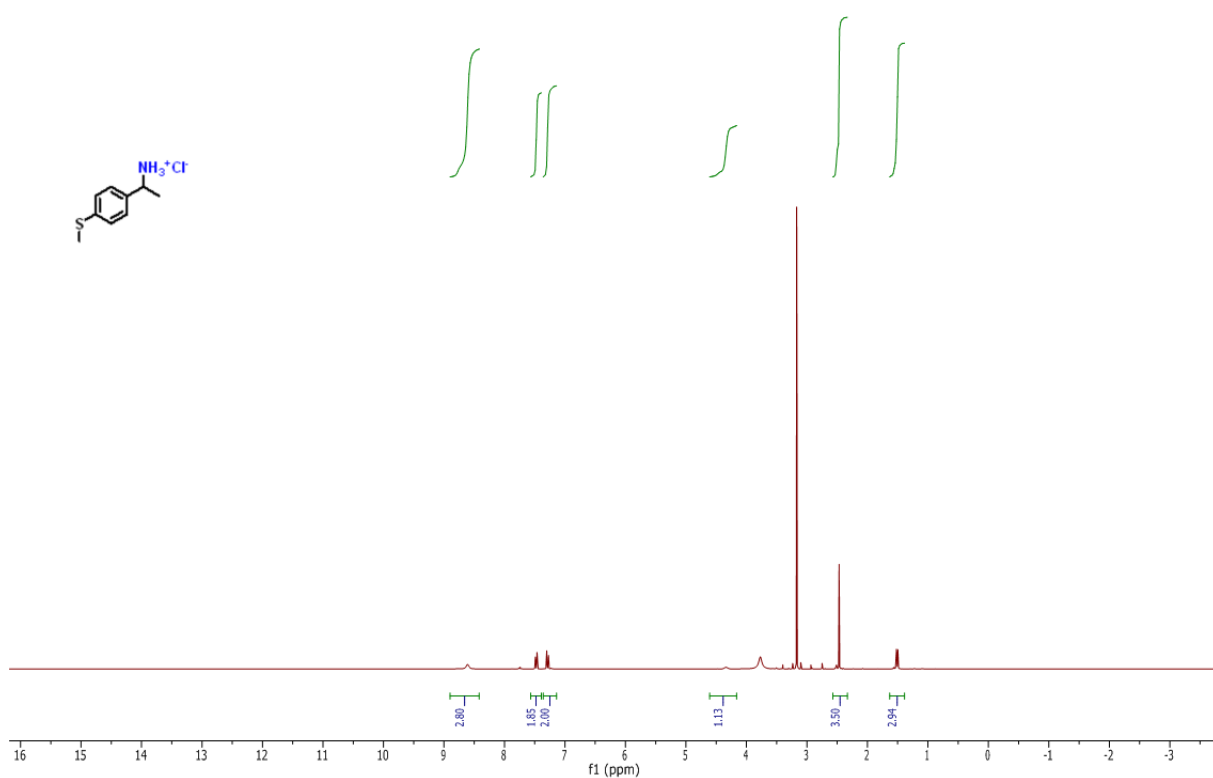

Supplementary Figure 93. <sup>1</sup>H NMR spectrum

1/1004.f325.11.fid  
Thiru TM5-289  
C13CPD DMSO {C:\Bruker\TopSpin3.5pl6} 1710 25

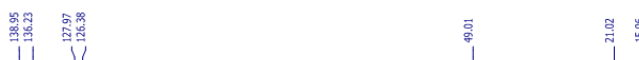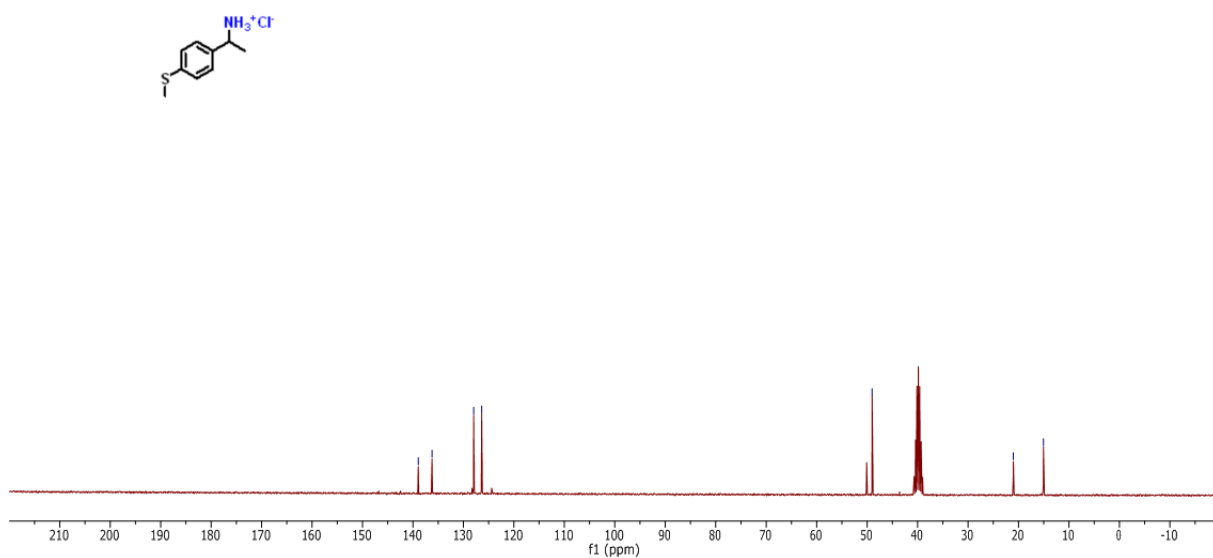

Supplementary Figure 94. <sup>13</sup>C NMR spectrum

170928.443.10.nd  
Thiru TMS-301  
Au1H DMSO {C:\Bruker\TopSpin3.5pl6} 1709 43

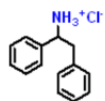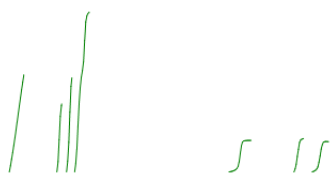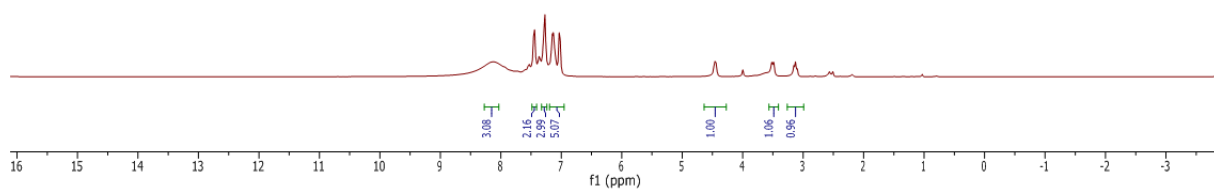

Supplementary Figure 95. <sup>1</sup>H NMR spectrum

170928.443.11.nd  
Thiru TMS-301  
Au13C DMSO {C:\Bruker\TopSpin3.5pl6} 1709 43

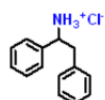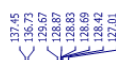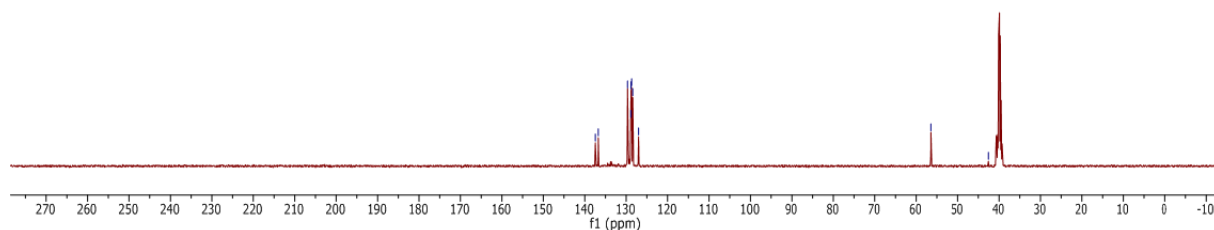

Supplementary Figure 96. <sup>13</sup>C NMR spectrum

1/0915.335.1.fid  
Thiru TM5-346  
Au1H DMSO {C:\Bruker\TopSpin3.5pl6} 1709 35

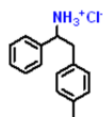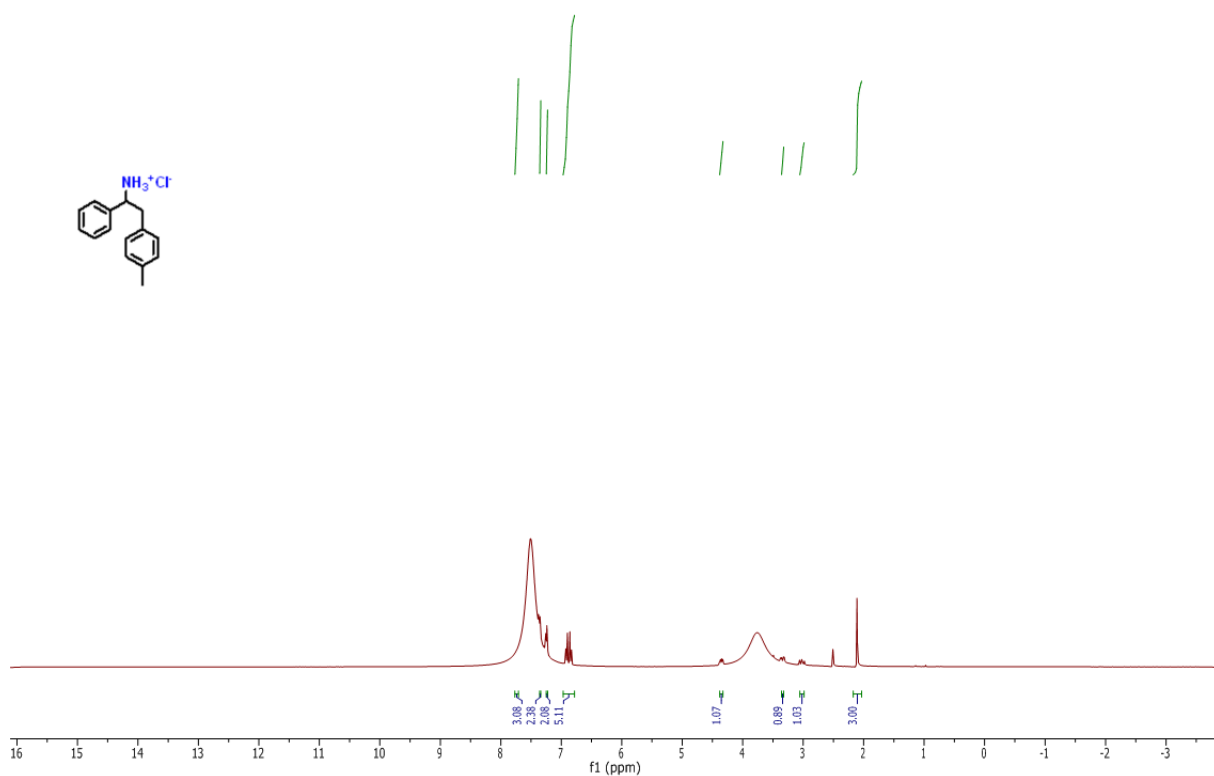

Supplementary Figure 97. <sup>1</sup>H NMR spectrum

1/0915.335.2.fid  
Thiru TM5-346  
Au13C DMSO {C:\Bruker\TopSpin3.5pl6} 1709 35

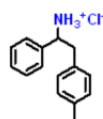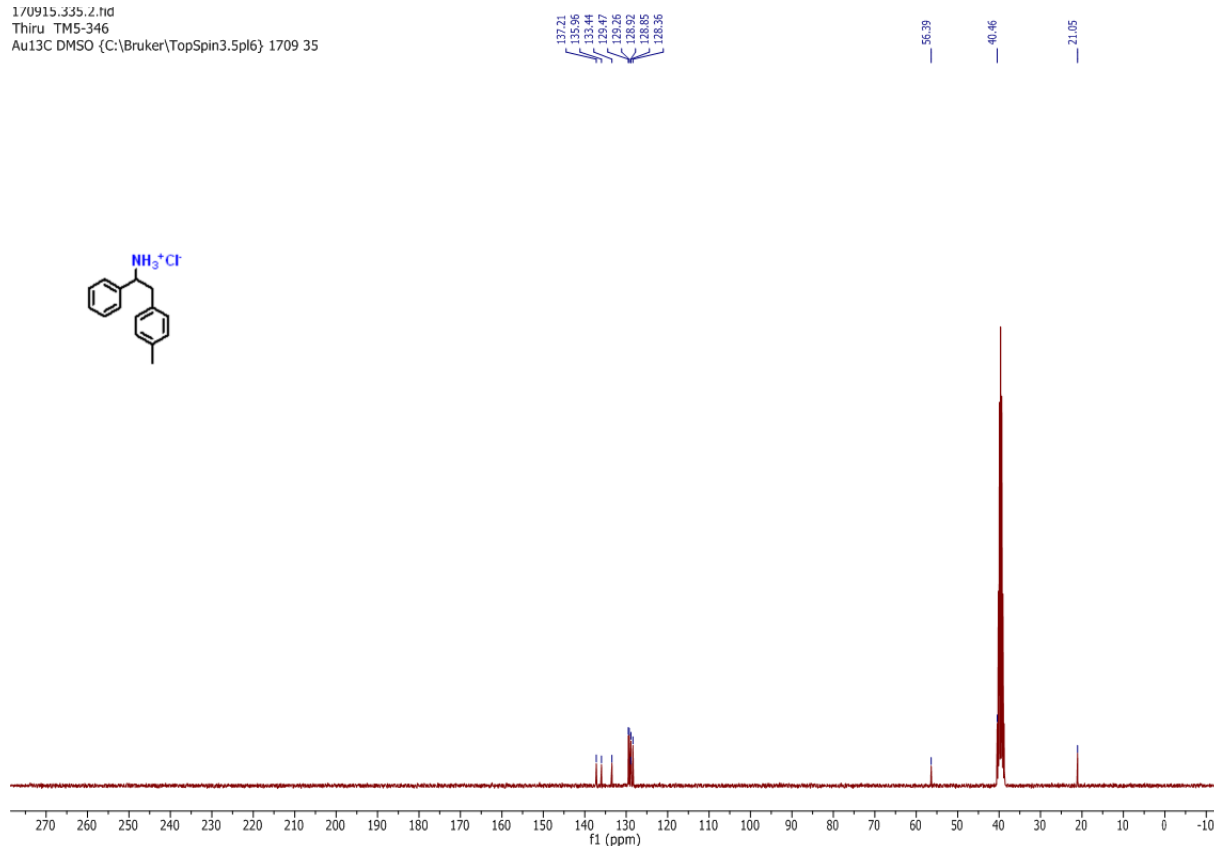

Supplementary Figure 98. <sup>13</sup>C NMR spectrum



1/0922.f333.10.fid  
Thiru/ TMS-300  
PROTON DMSO {C:\Bruker\TopSpin3.5pl6} 1709 33

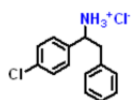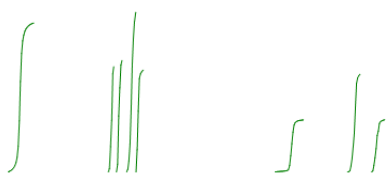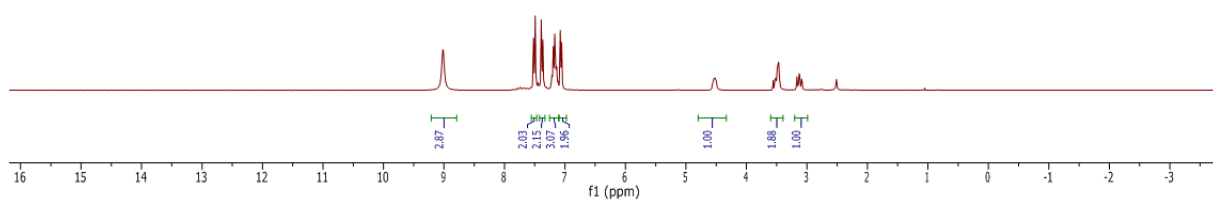

Supplementary Figure 99. <sup>1</sup>H NMR spectrum

1/0922.f333.11.fid  
Thiru/ TMS-300  
C13CPD DMSO {C:\Bruker\TopSpin3.5pl6} 1709 33

136.52  
133.52  
130.44  
129.70  
128.92  
127.77  
127.11

55.63  
40.50

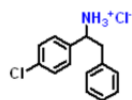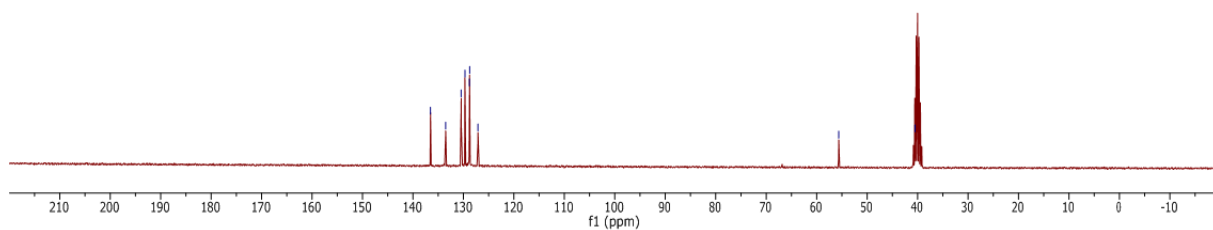

Supplementary Figure 100. <sup>13</sup>C NMR spectrum

1/1005.404.10.nd  
Thiru TM5-294  
Au1H DMSO {C:\Bruker\TopSpin3.5pl6} 1710 4

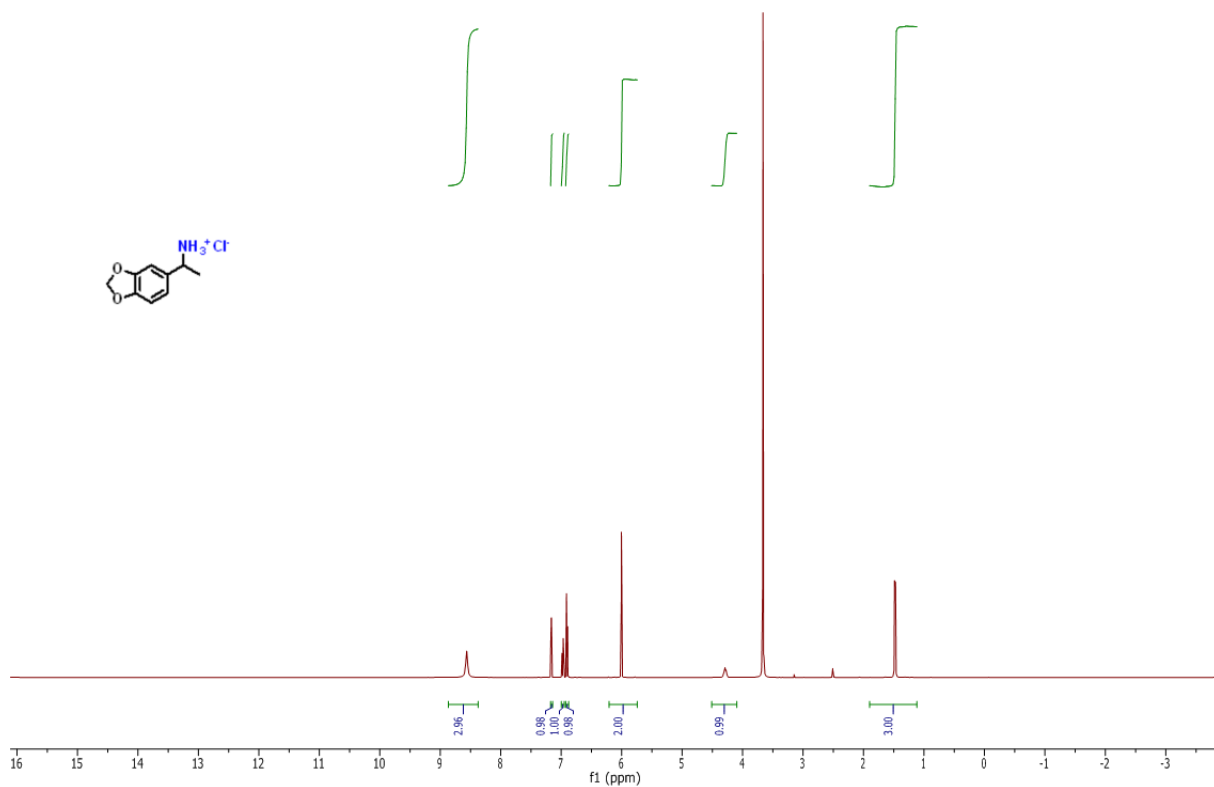

Supplementary Figure 101.  $^1\text{H}$  NMR spectrum

1/1005.404.11.nd  
Thiru TM5-294  
Au13C DMSO {C:\Bruker\TopSpin3.5pl6} 1710 4

147.82  
147.55  
133.49  
121.12  
108.68  
107.76  
101.65  
50.40  
21.19

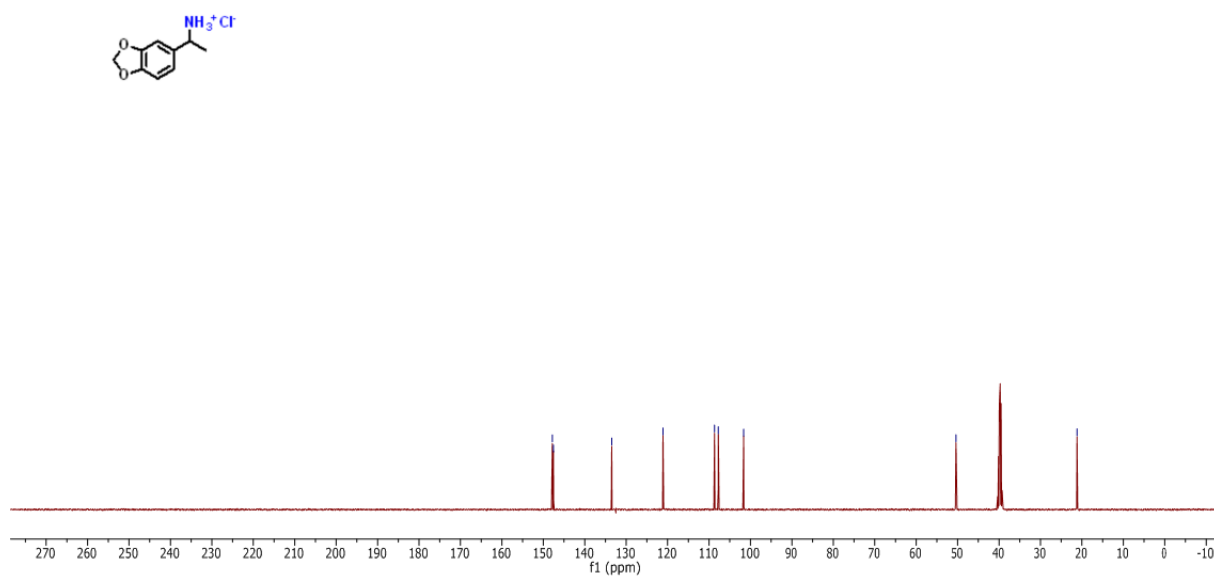

Supplementary Figure 102.  $^{13}\text{C}$  NMR spectrum

170922.f339.10.fid  
Thiru/ TM5-279  
PROTON DMSO {C:\Bruker\TopSpin3.5pl6} 1709 39

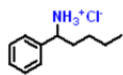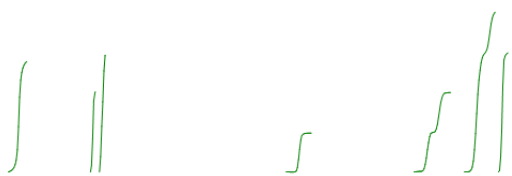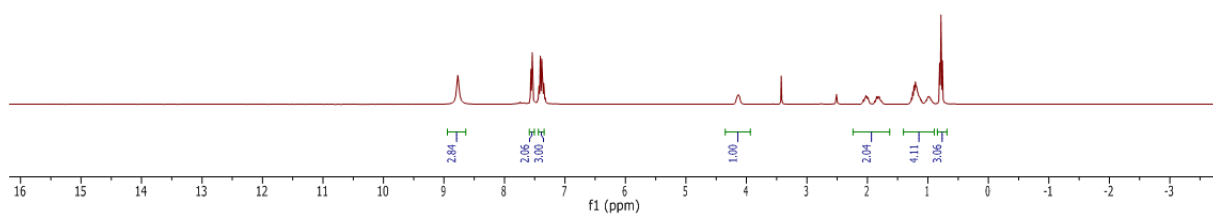

Supplementary Figure 103. <sup>1</sup>H NMR spectrum

170922.f339.11.fid  
Thiru/ TM5-279  
C13CPD DMSO {C:\Bruker\TopSpin3.5pl6} 1709 39

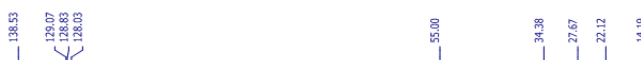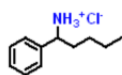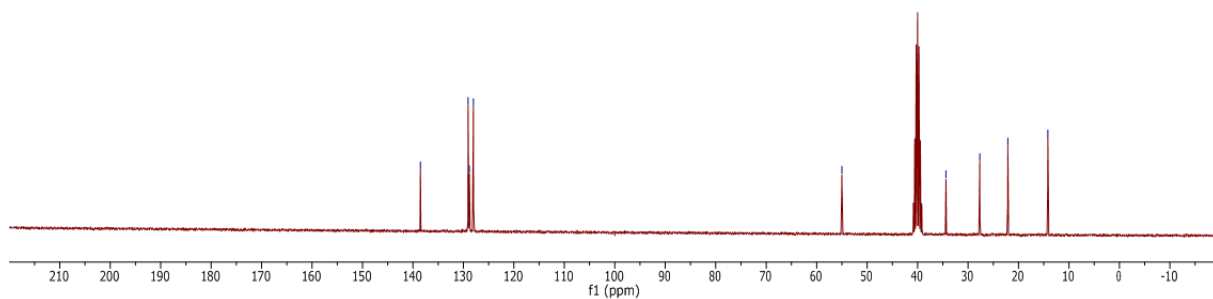

Supplementary Figure 104. <sup>13</sup>C NMR spectrum

171023.402.10.nd  
Thiru TMS-413  
Au1H DMSO {C:\Bruker\TopSpin3.5pl6} 1710 2

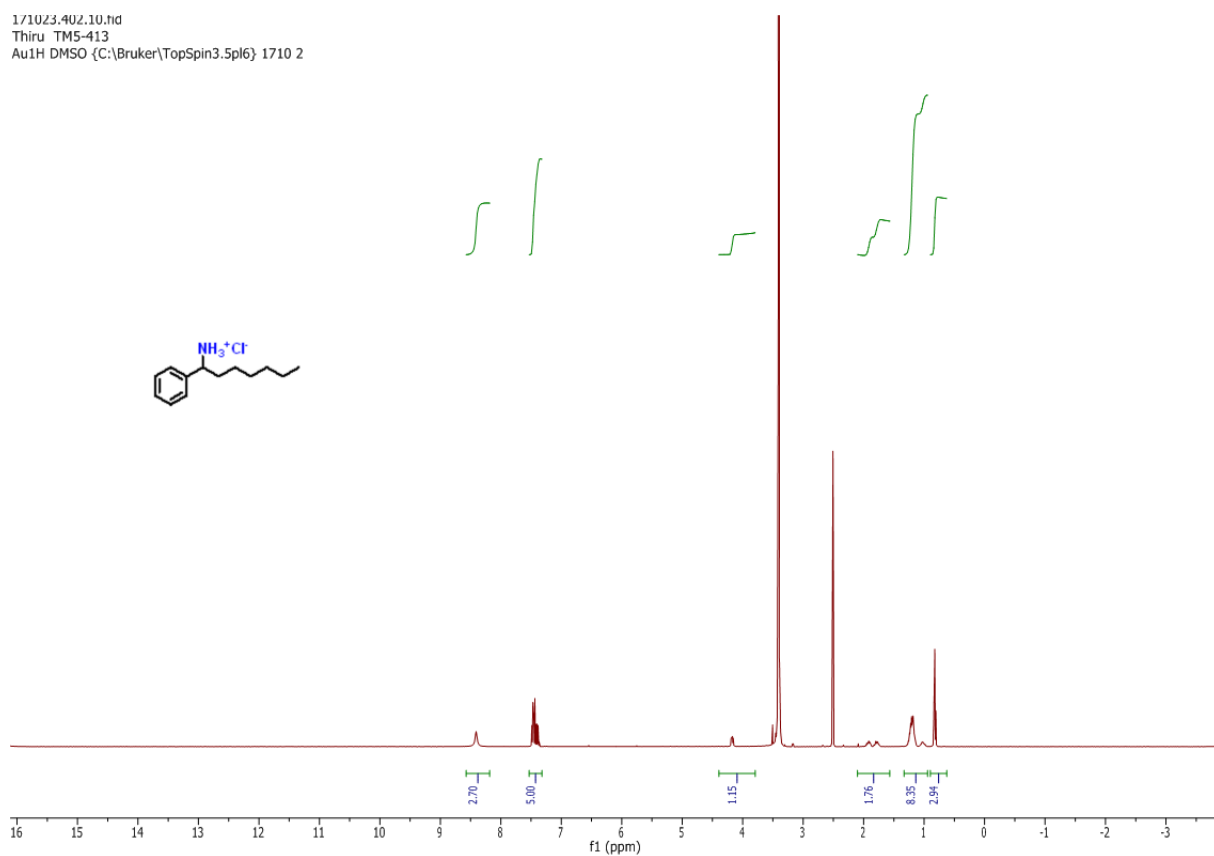

Supplementary Figure 105. <sup>1</sup>H NMR spectrum

171023.402.11.nd  
Thiru TMS-413  
Au13C DMSO {C:\Bruker\TopSpin3.5pl6} 1710 2

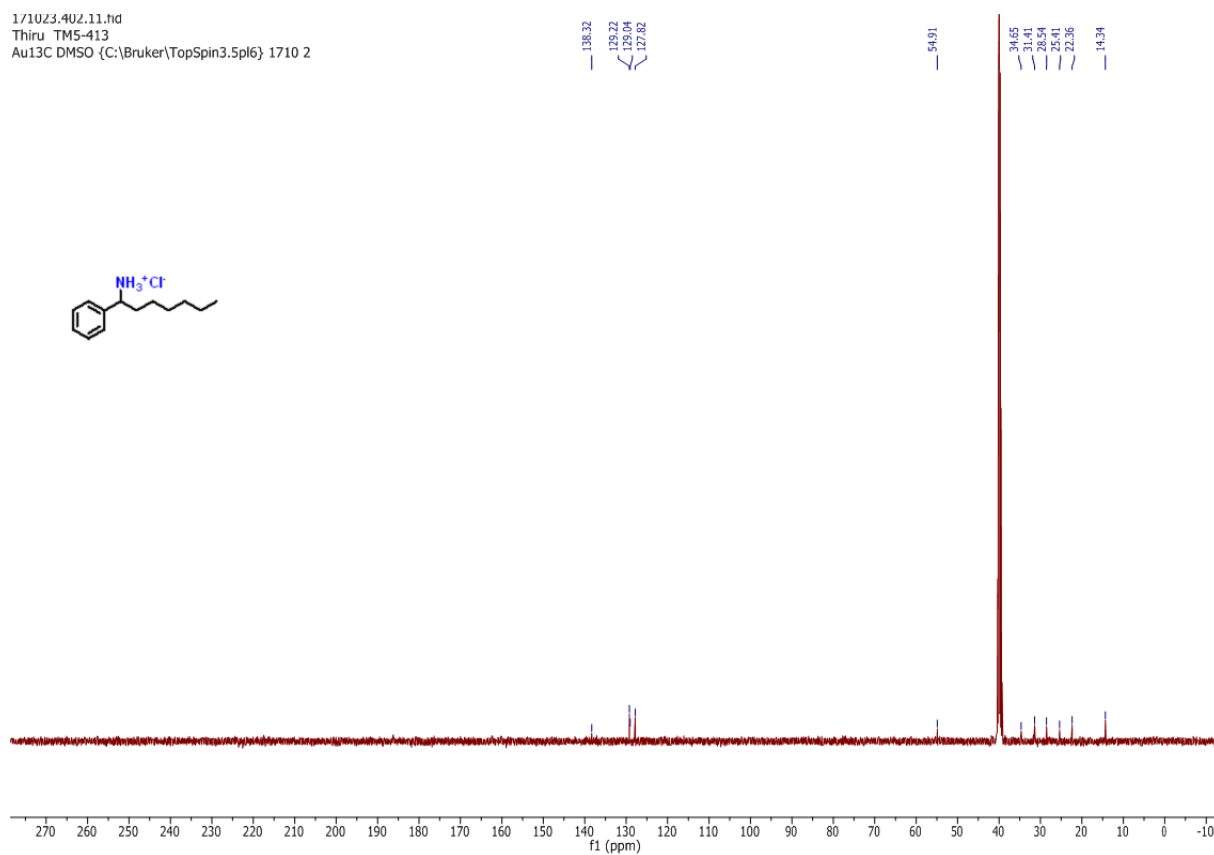

Supplementary Figure 106. <sup>13</sup>C NMR spectrum

170927.f336.10.fid  
Thiru TM5-342  
PROTON DMSO {C:\Bruker\TopSpin3.5pl6} 1709 36

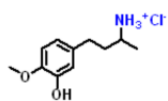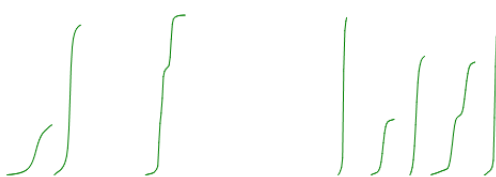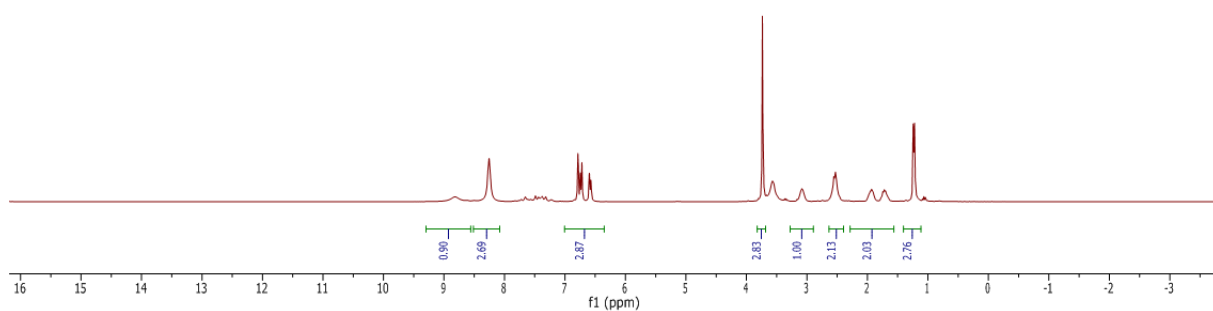

Supplementary Figure 107. <sup>1</sup>H NMR spectrum

170927.f336.11.fid  
Thiru TM5-342  
C13CPD DMSO {C:\Bruker\TopSpin3.5pl6} 1709 36

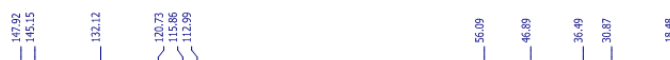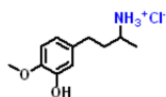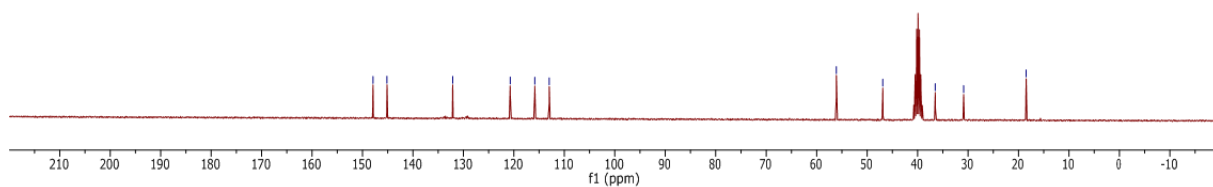

Supplementary Figure 108. <sup>13</sup>C NMR spectrum

170928.440.10.nd  
Thiru TMS-298  
Au1H DMSO {C:\Bruker\TopSpin3.5pl6} 1709 40

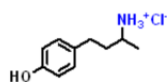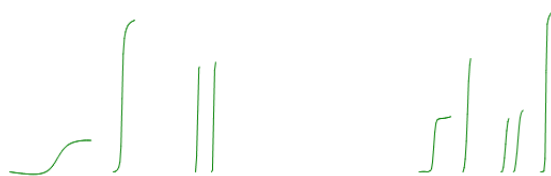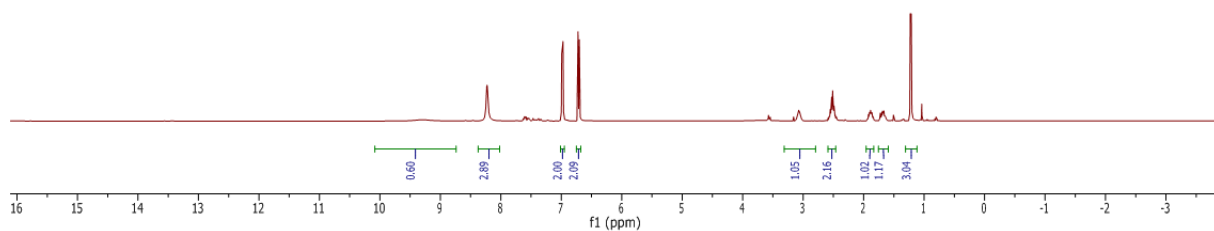

**Supplementary Figure 109.** <sup>1</sup>H NMR spectrum

170928.440.11.nd  
Thiru TMS-298  
Au13C DMSO {C:\Bruker\TopSpin3.5pl6} 1709 40

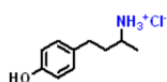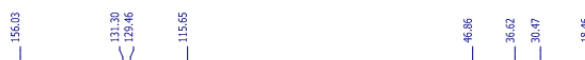

**Supplementary Figure 110.** <sup>13</sup>C NMR spectrum

170927.f336.10.fid  
Thiru TM5-342  
PROTON DMSO {C:\Bruker\TopSpin3.5pl6} 1709 36



Supplementary Figure 111. <sup>1</sup>H NMR spectrum

170927.f336.11.fid  
Thiru TM5-342  
C13CPD DMSO {C:\Bruker\TopSpin3.5pl6} 1709 36



Supplementary Figure 112. <sup>13</sup>C NMR spectrum

1/0915.f355.10.fid  
Thiru TM5-274  
PROTON DMSO {C:\Bruker\TopSpin3.5pl6} 1709 55

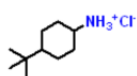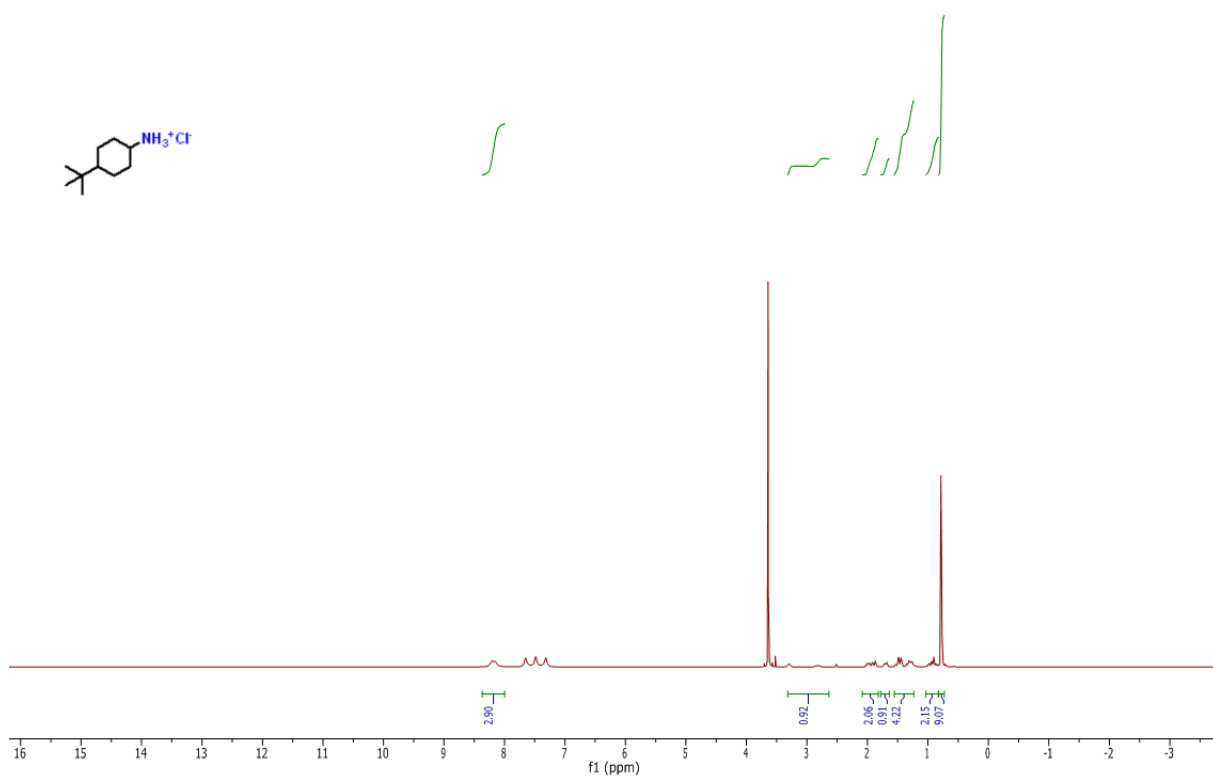

Supplementary Figure 113. <sup>1</sup>H NMR spectrum

1/0915.f355.11.fid  
Thiru TM5-274  
C13CPD DMSO {C:\Bruker\TopSpin3.5pl6} 1709 55

50.05  
47.47  
46.68  
46.15  
32.71  
32.42  
30.81  
29.65  
27.91  
27.79  
25.38  
20.71

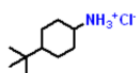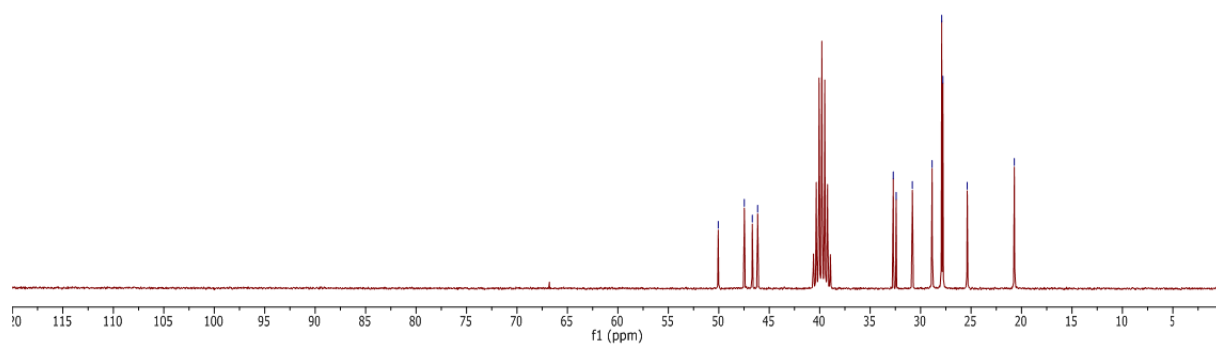

Supplementary Figure 114. <sup>13</sup>C NMR spectrum



170926.426.10.nd  
Thiru TMS-206  
Au1H DMSO {C:\Bruker\TopSpin3.5pl6} 1709 26

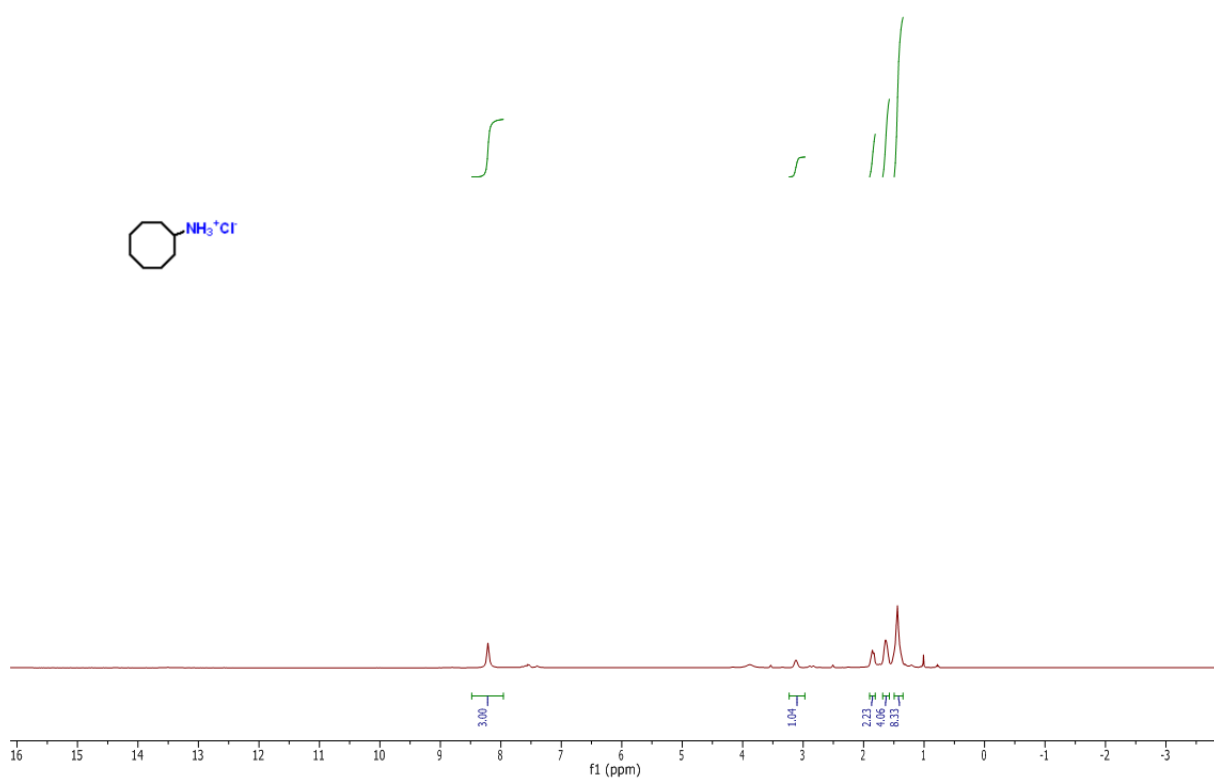

Supplementary Figure 115. <sup>1</sup>H NMR spectrum

170926.426.11.nd  
Thiru TMS-206  
Au13C DMSO {C:\Bruker\TopSpin3.5pl6} 1709 26

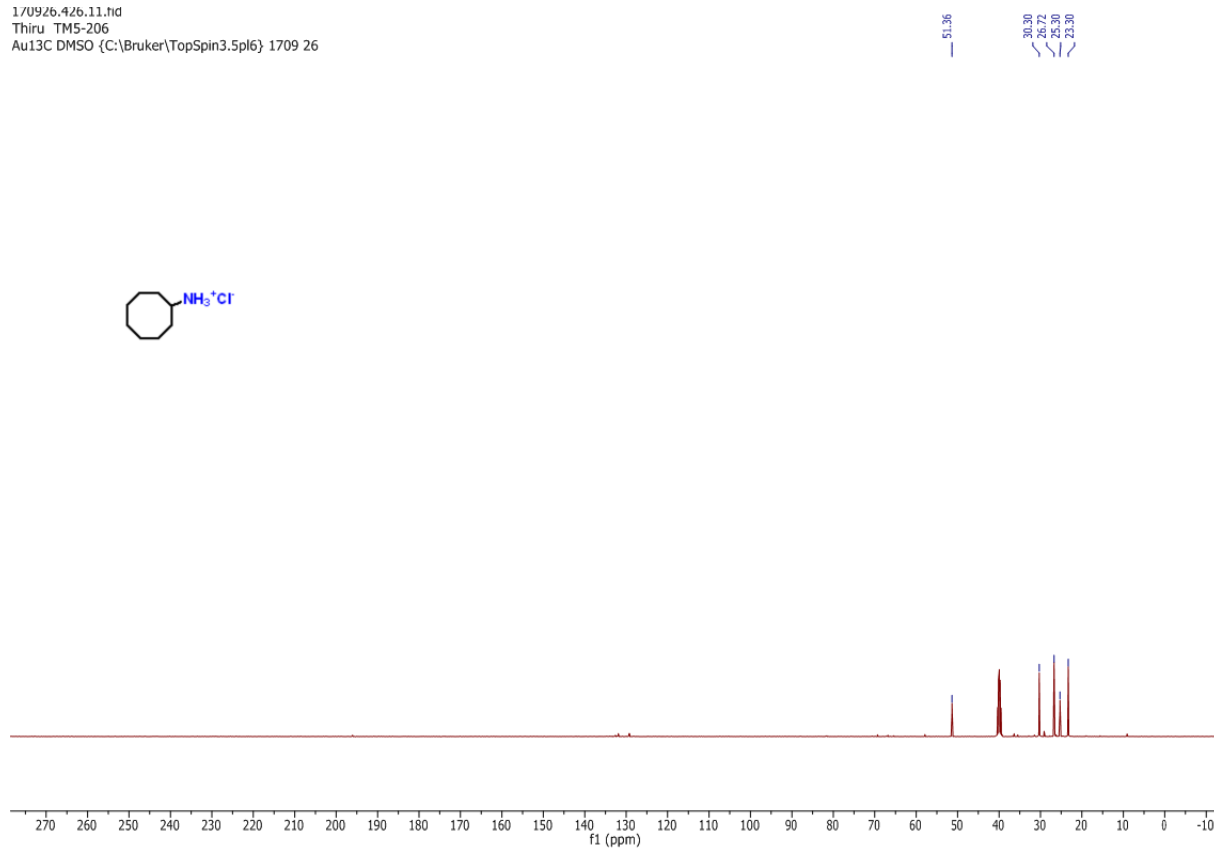

Supplementary Figure 116. <sup>13</sup>C NMR spectrum

170927.1337.10.nd  
Thiru TM5-306  
PROTON DMSO {C:\Bruker\TopSpin3.5pl6} 1709 37

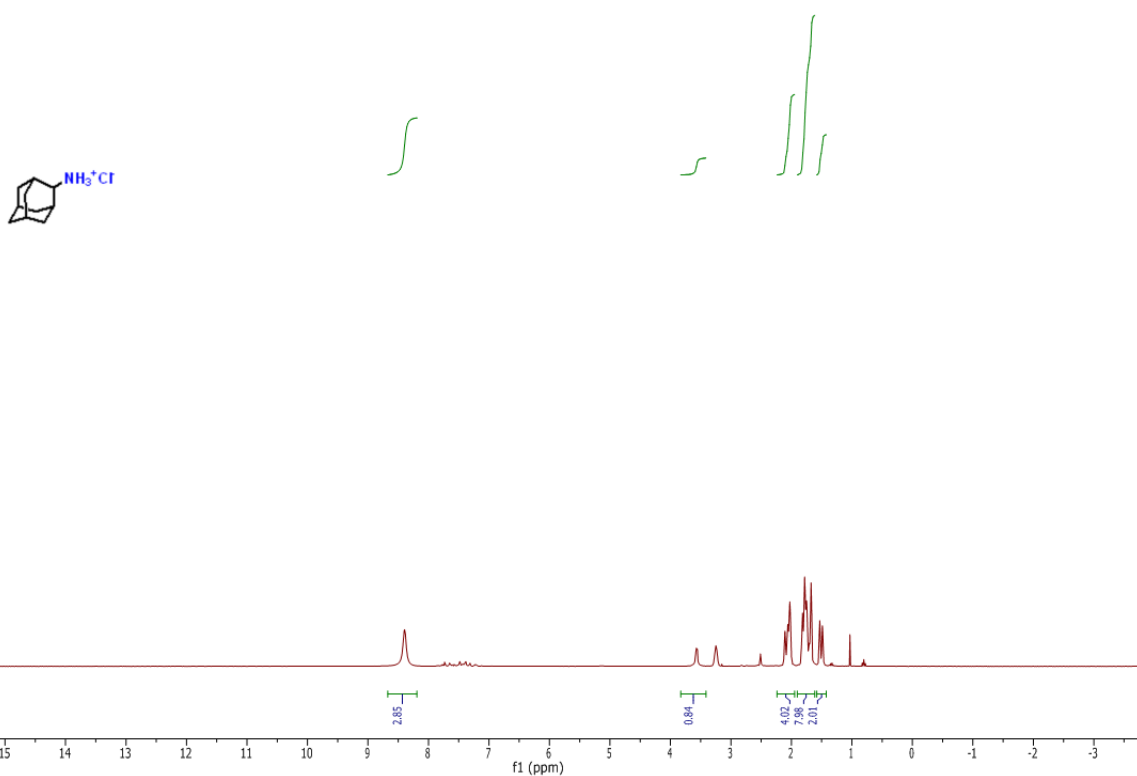

**Supplementary Figure 117.**  $^1\text{H}$  NMR spectrum

170927.1337.11.nd  
Thiru TM5-306  
C13CPD DMSO {C:\Bruker\TopSpin3.5pl6} 1709 37

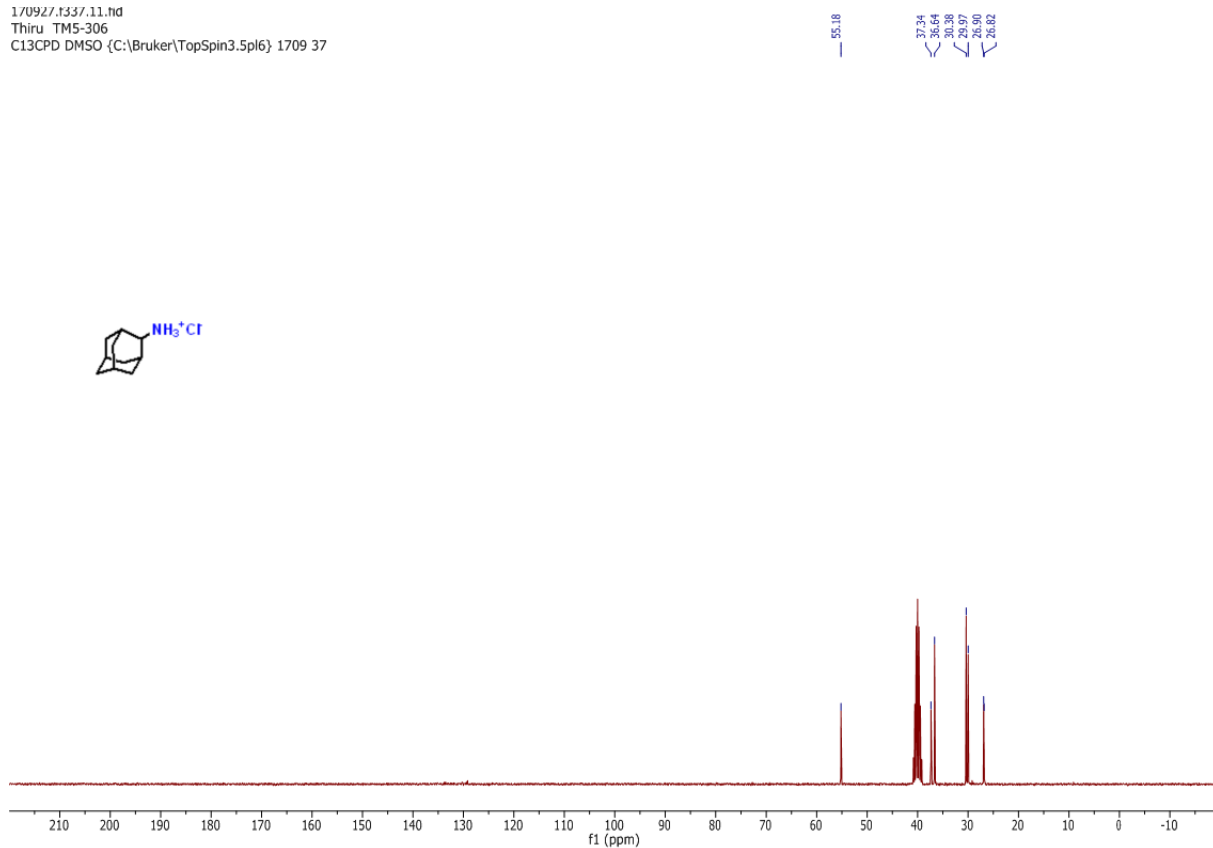

**Supplementary Figure 118.**  $^{13}\text{C}$  NMR spectrum

170915.f339.10.fid  
Kathir TMS-282  
PROTON DMSO {C:\Bruker\TopSpin3.5pl6} 1709 39

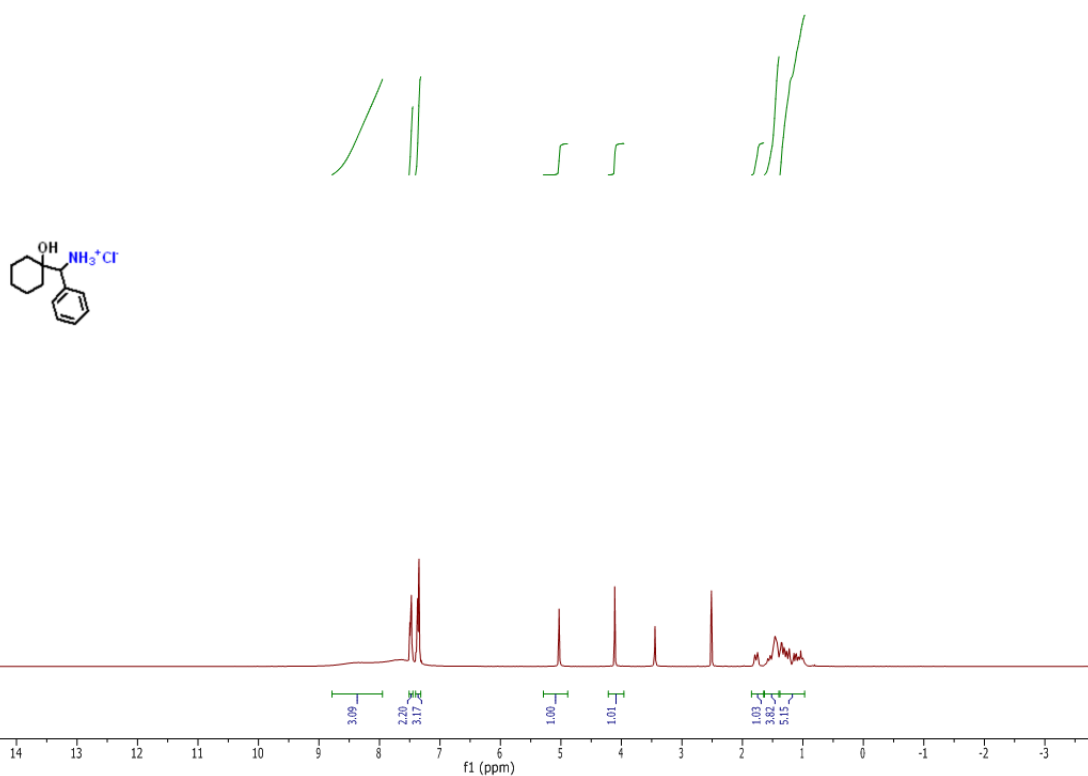

Supplementary Figure 119. <sup>1</sup>H NMR spectrum

170915.f339.11.fid  
Kathir TMS-282  
C13CPD DMSO {C:\Bruker\TopSpin3.5pl6} 1709 39

135.84 129.42 128.98 128.33 71.25 63.31 34.85 32.98 25.47 21.47 21.12

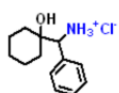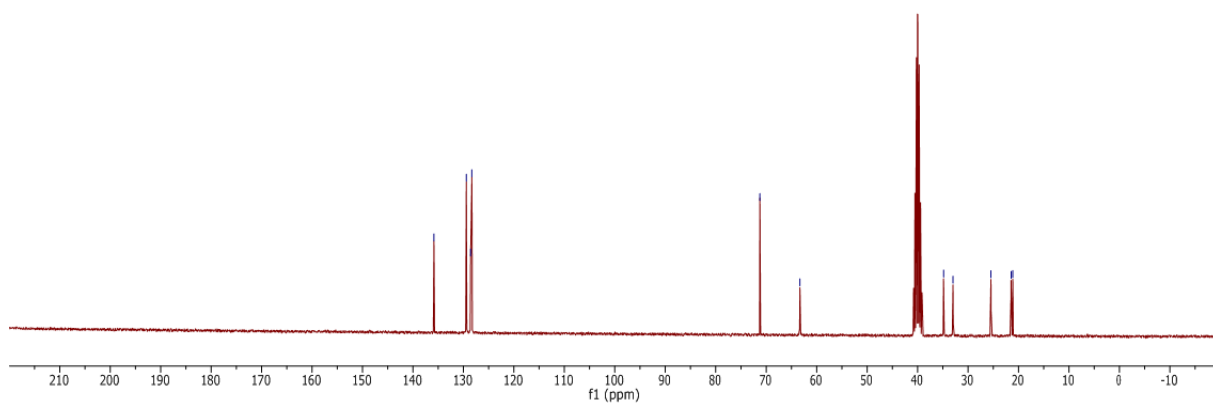

Supplementary Figure 120. <sup>13</sup>C NMR spectrum

1/1004.f324.10.fid  
Thiru TM5-287  
PROTON DMSO {C:\Bruker\TopSpin3.5pl6} 1710 24

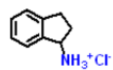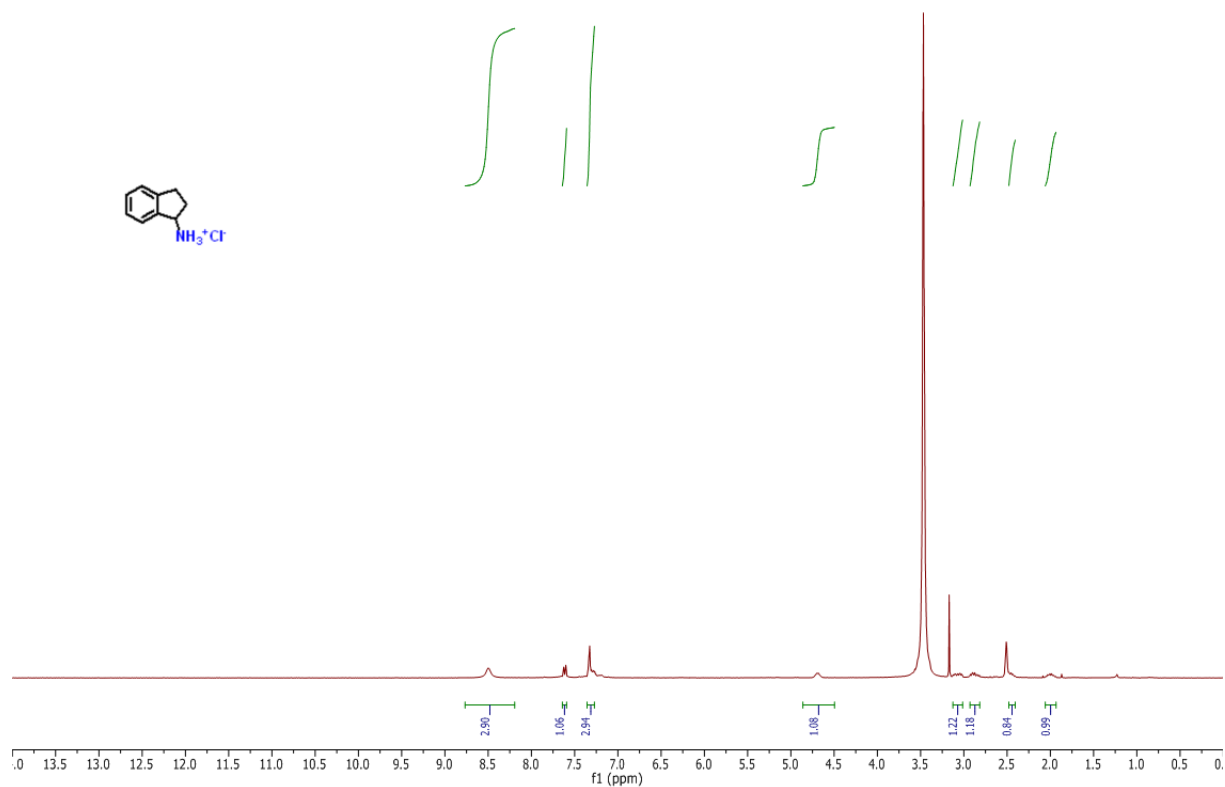

Supplementary Figure 121. <sup>1</sup>H NMR spectrum

1/1004.f324.11.fid  
Thiru TM5-287  
C13CPD DMSO {C:\Bruker\TopSpin3.5pl6} 1710 24

144.39 138.71 128.44 127.11 126.38 125.37 55.12 30.73 30.27

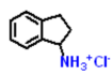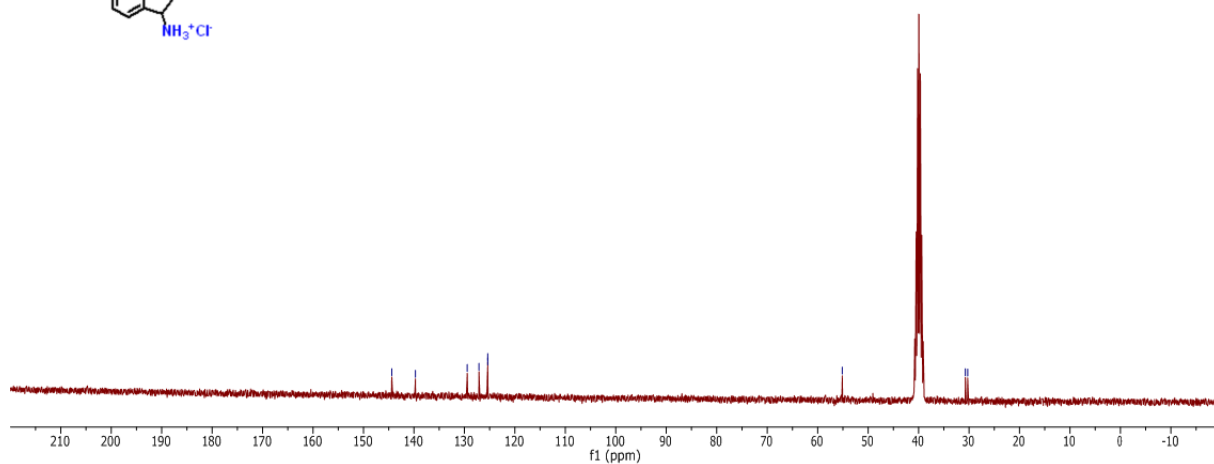

Supplementary Figure 122. <sup>13</sup>C NMR spectrum

1/1023.404.10.nd  
Thiru TMS-415  
Au1H DMSO {C:\Bruker\TopSpin3.5pl6} 1710 4

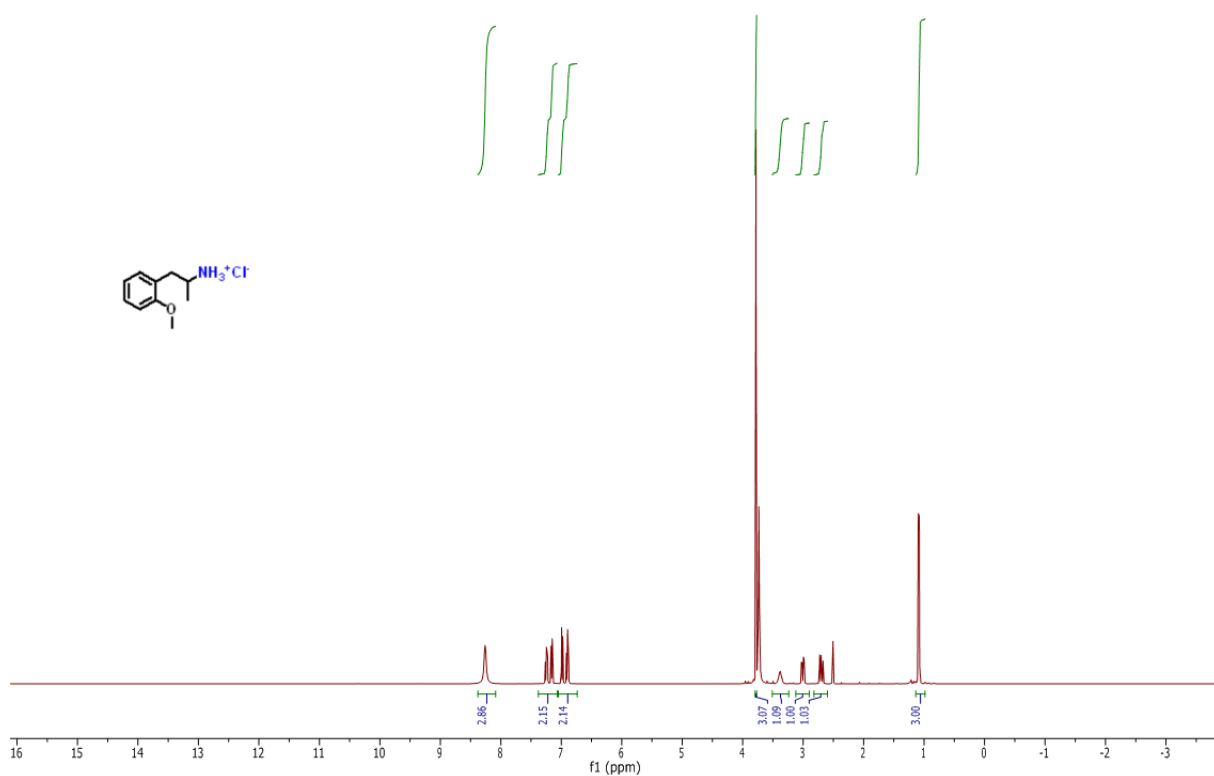

Supplementary Figure 125. <sup>1</sup>H NMR spectrum

1/1023.404.11.nd  
Thiru TMS-415  
Au13C DMSO {C:\Bruker\TopSpin3.5pl6} 1710 4

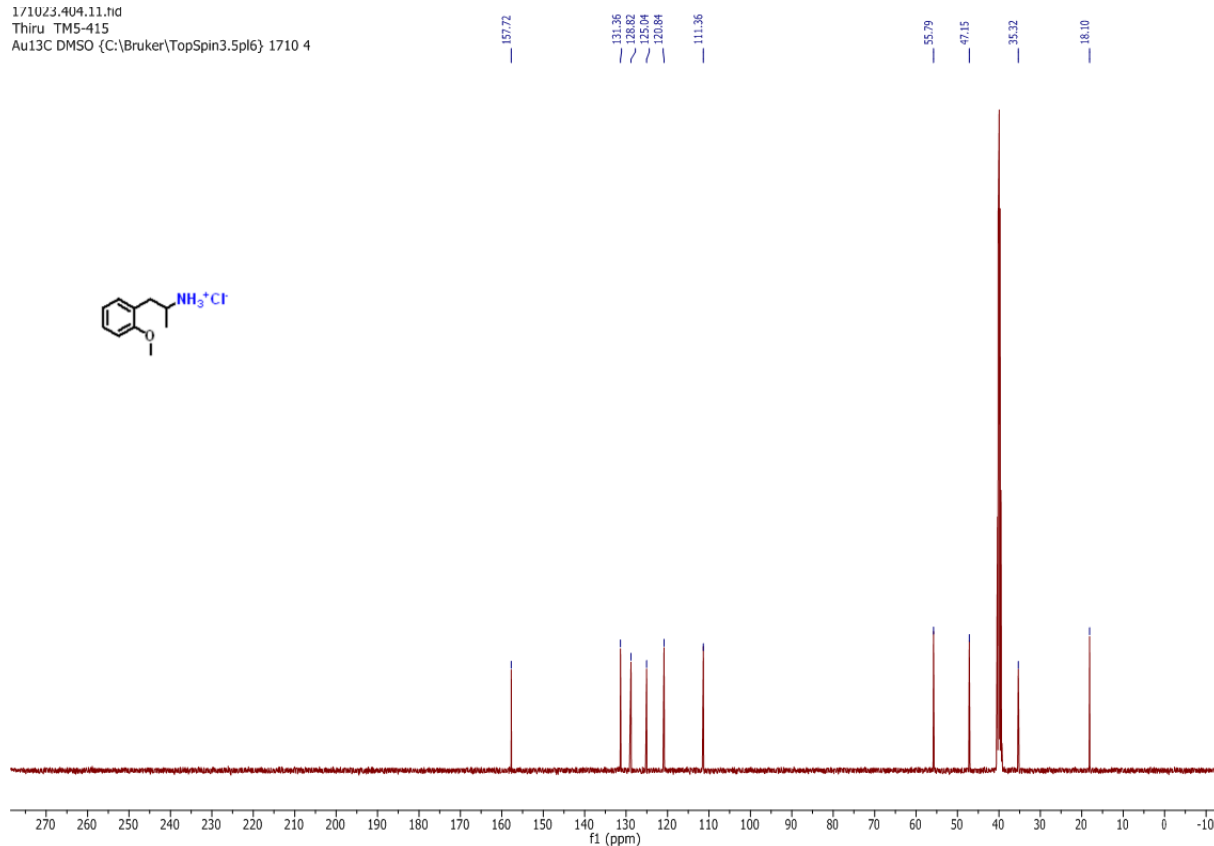

Supplementary Figure 126. <sup>13</sup>C NMR spectrum

171023.405.10.nd  
Thiru TMS-416  
Au1H DMSO {C:\Bruker\TopSpin3.5pl6} 1710 5

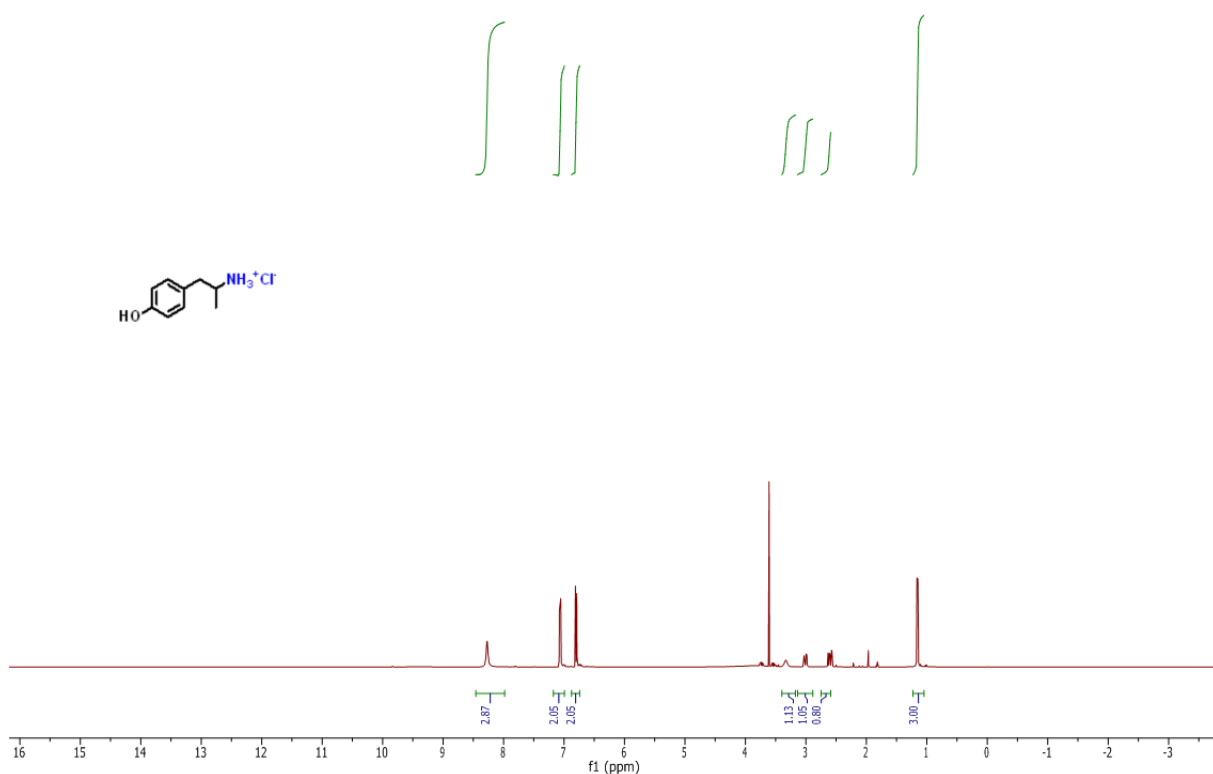

Supplementary Figure 127. <sup>1</sup>H NMR spectrum

171023.405.11.nd  
Thiru TMS-416  
Au13C DMSO {C:\Bruker\TopSpin3.5pl6} 1710 5

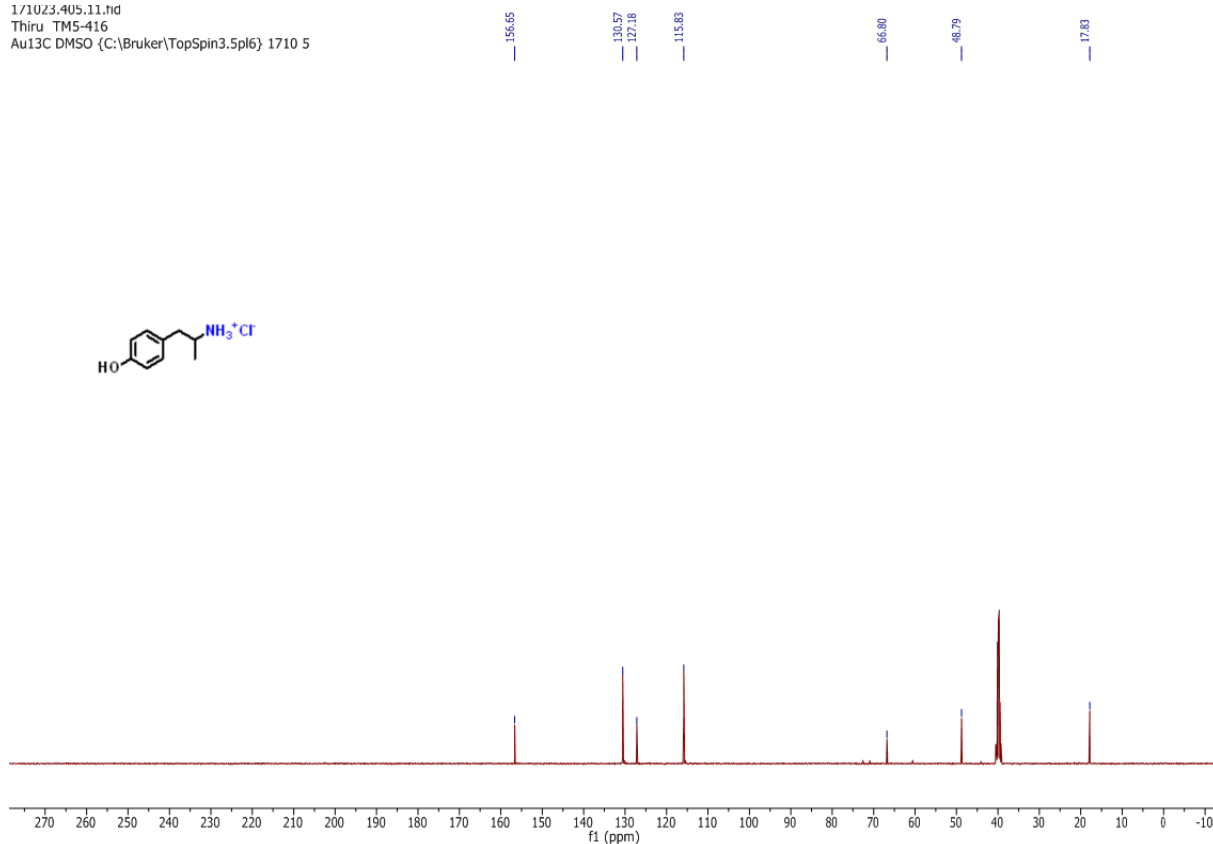

Supplementary Figure 128. <sup>13</sup>C NMR spectrum

1/1004.f315.10.fid  
Thiru TMS-207  
PROTON DMSO {C:\Bruker\TopSpin3.5pl6} 1710 15

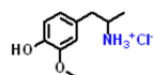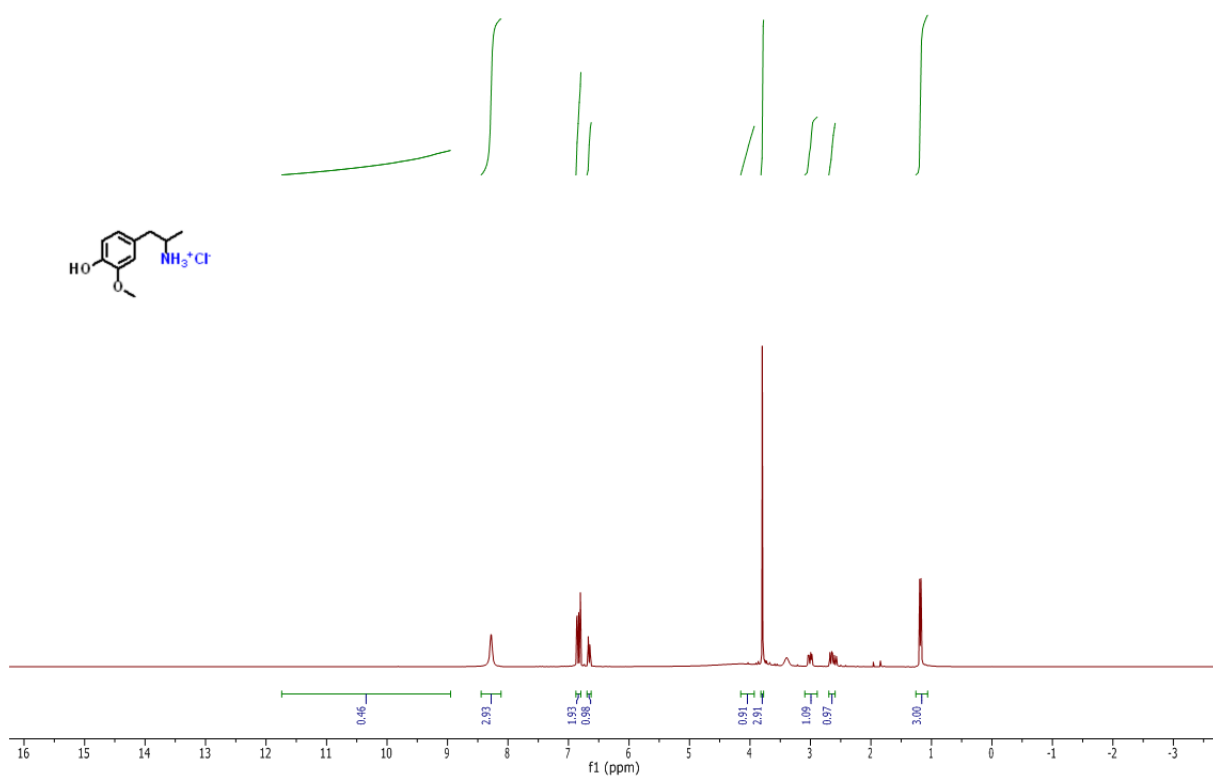

Supplementary Figure 129. <sup>1</sup>H NMR spectrum

1/1004.f315.11.fid  
Thiru TMS-207  
C13CPD DMSO {C:\Bruker\TopSpin3.5pl6} 1710 15

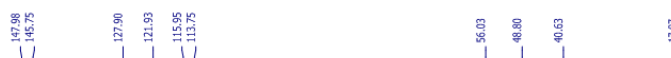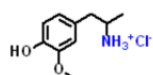

Supplementary Figure 130. <sup>13</sup>C NMR spectrum

1/1023.407.10.nd  
Thiru TM5-427  
Au1H DMSO {C:\Bruker\TopSpin3.5pl6} 1710 7

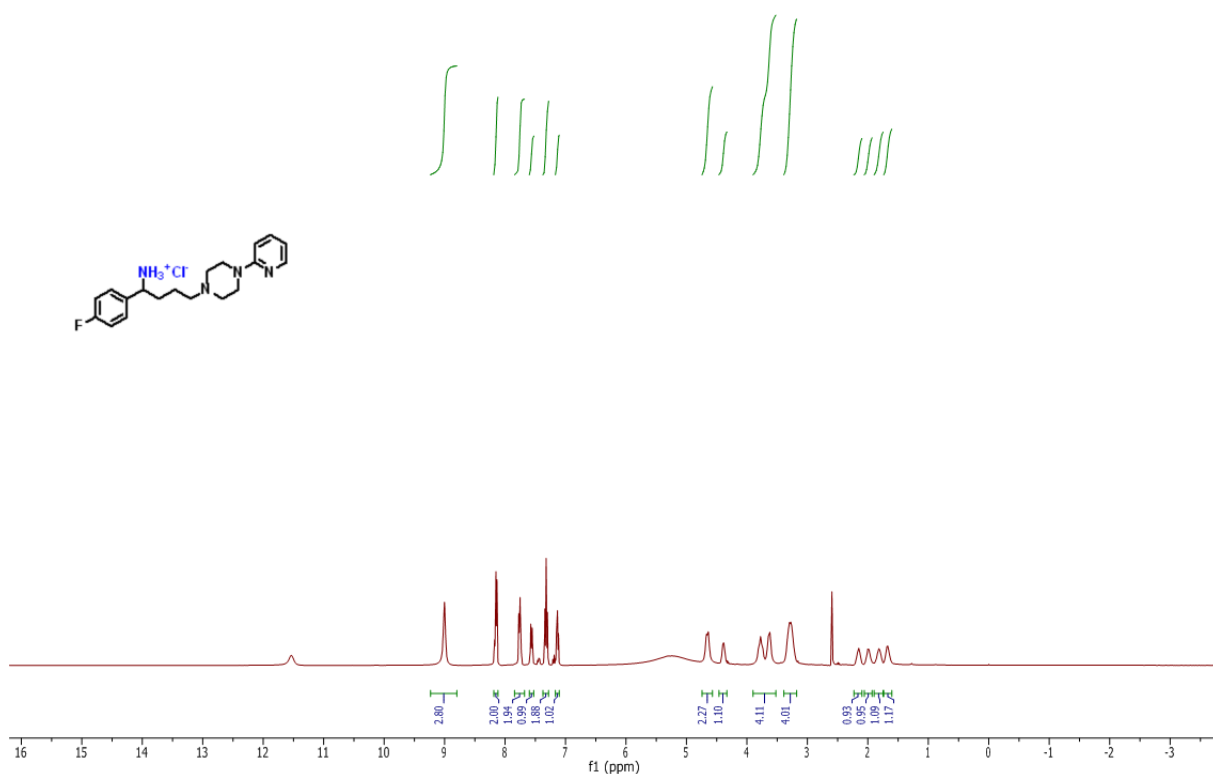

Supplementary Figure 131. <sup>1</sup>H NMR spectrum

1/1023.407.11.nd  
Thiru TM5-427  
Au13C DMSO {C:\Bruker\TopSpin3.5pl6} 1710 7

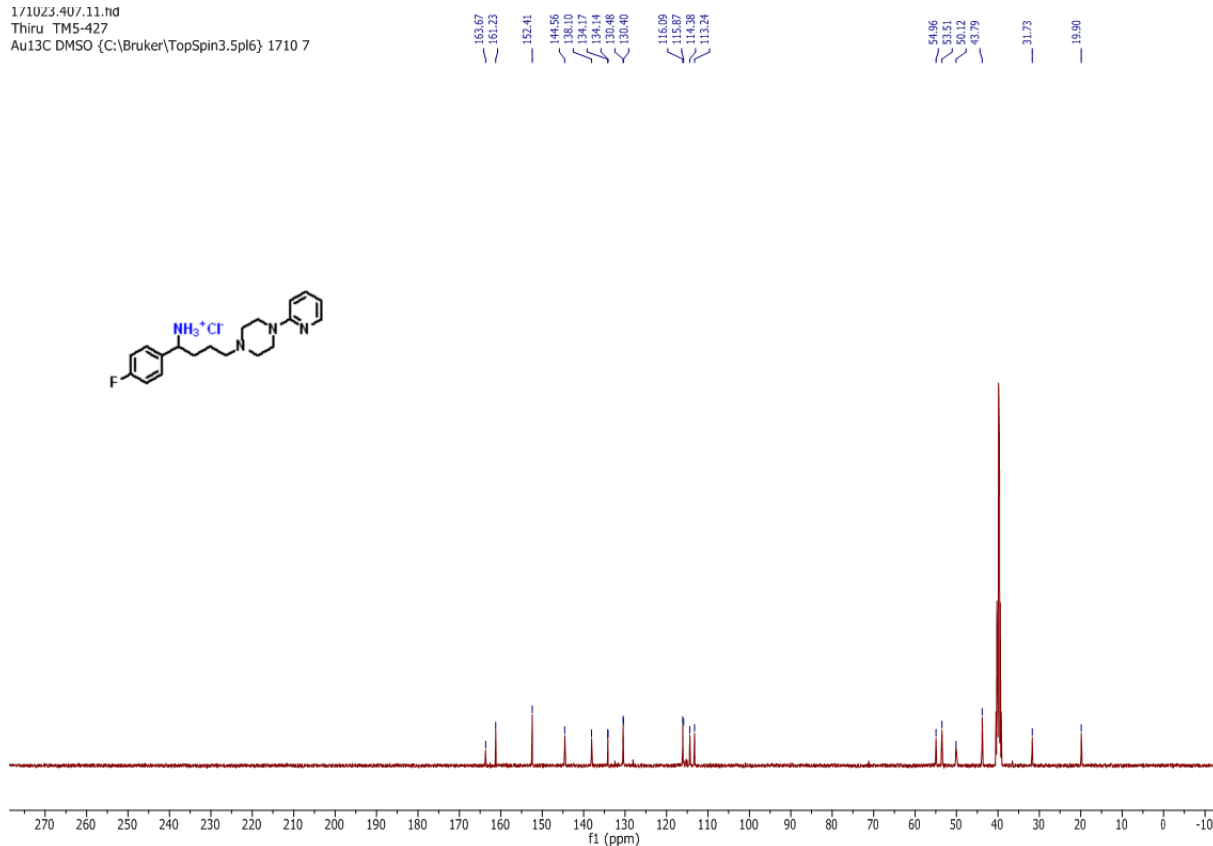

Supplementary Figure 132. <sup>13</sup>C NMR spectrum



171030.f328.10.fid  
Thiru TM5-428  
PROTON MeOD {C:\Bruker\TopSpin3.5pl6} 1710 28

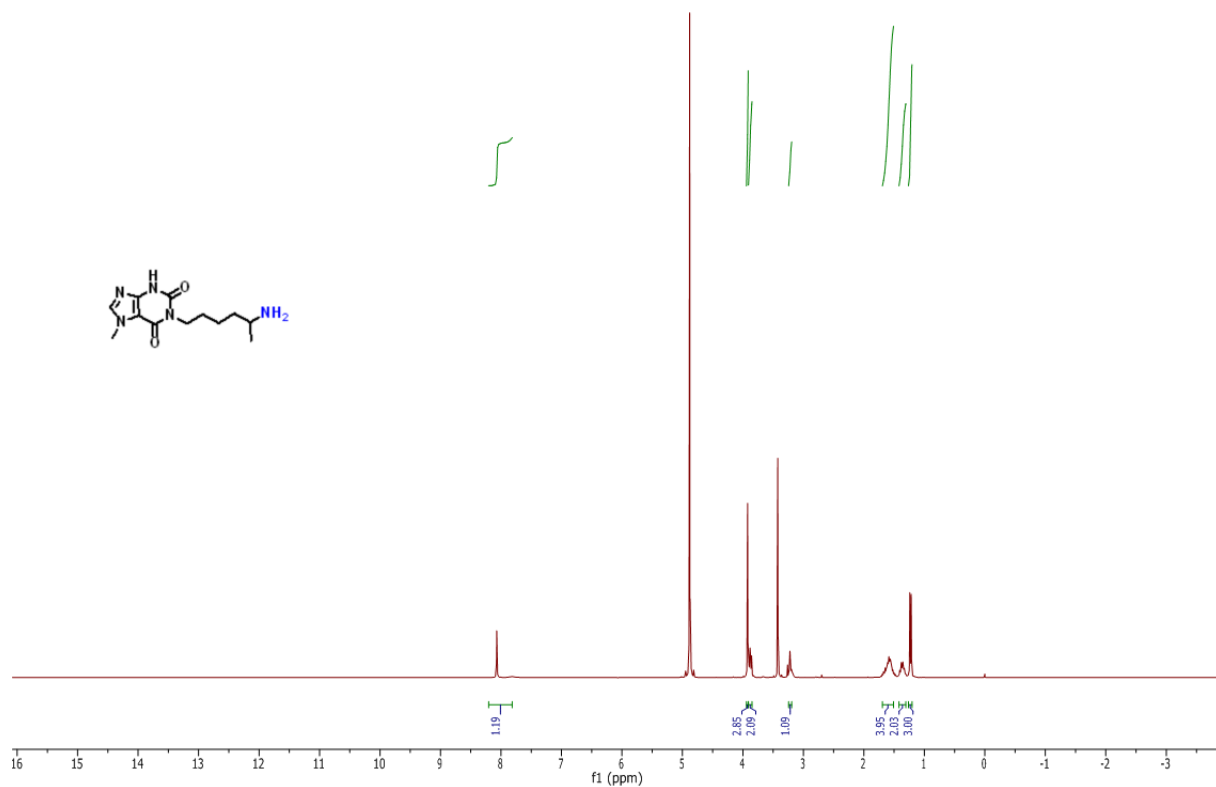

**Supplementary Figure 133.**  $^1\text{H}$  NMR spectrum

171030.f328.11.fid  
Thiru TM5-428  
C13CPD MeOD {C:\Bruker\TopSpin3.5pl6} 1710 28

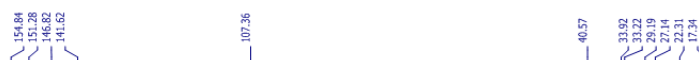

**Supplementary Figure 134.**  $^{13}\text{C}$  NMR spectrum

1/1221.f330.10.fid  
Thiru, TM5-307  
PROTON DMSO {C:\Bruker\TopSpin3.5pl6} 1712 30

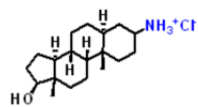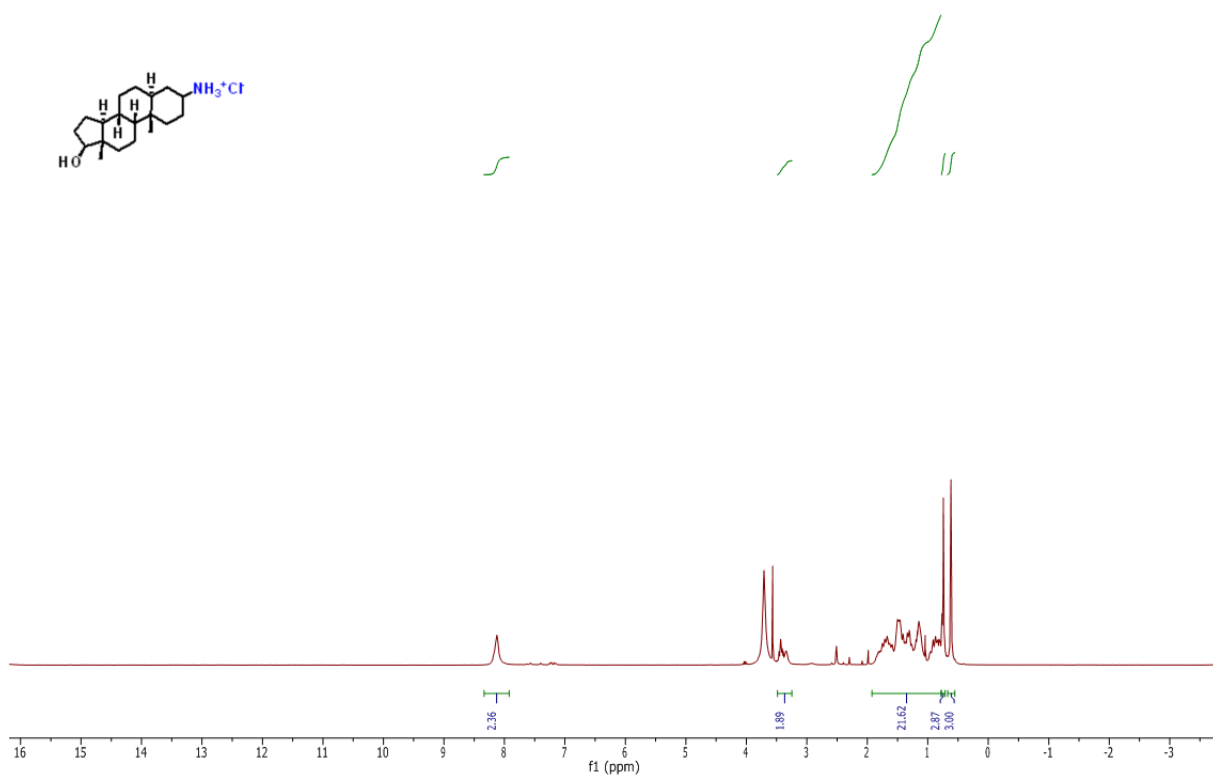

Supplementary Figure 135. <sup>1</sup>H NMR spectrum

1/1221.f330.11.fid  
Thiru, TM5-307  
C13CPD DMSO {C:\Bruker\TopSpin3.5pl6} 1712 30

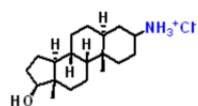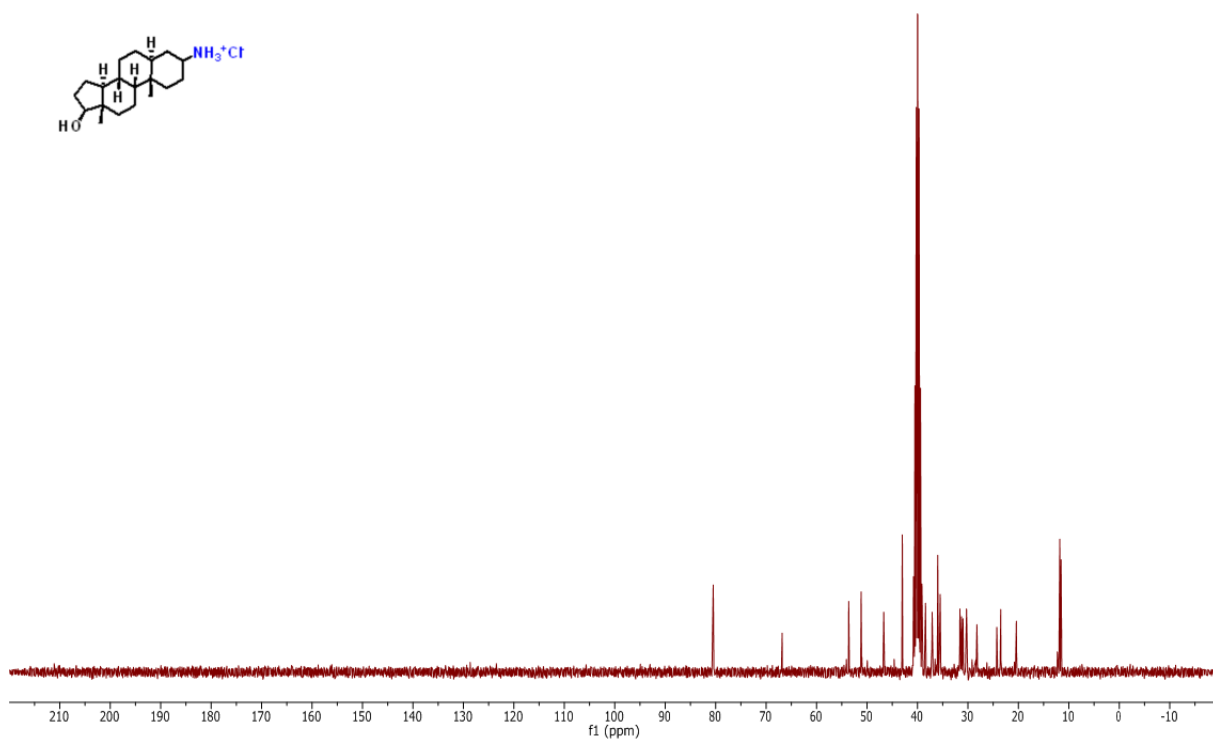

Supplementary Figure 136. <sup>13</sup>C NMR spectrum

1/1006.f325.10.fid  
Thiru TMS-363  
PROTON DMSO {C:\Bruker\TopSpin3.5pl6} 1710 25

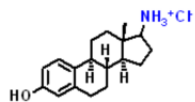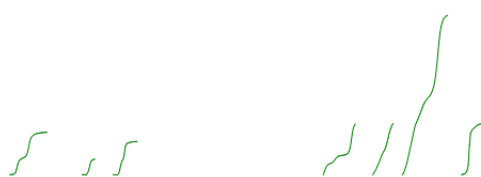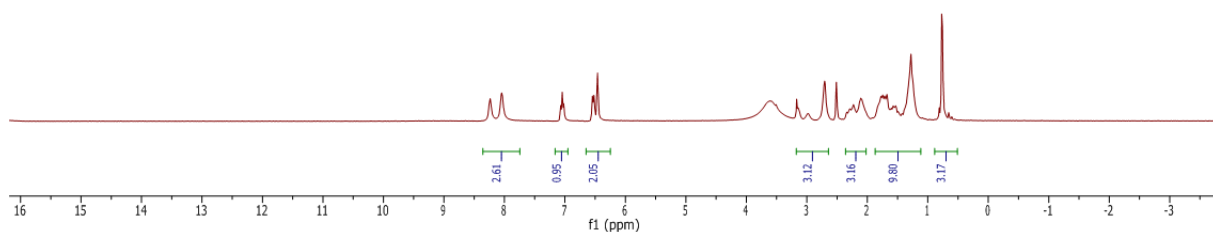

**Supplementary Figure 137.** <sup>1</sup>H NMR spectrum

1/1006.f325.11.fid  
Thiru TMS-363  
C13CPD DMSO {C:\Bruker\TopSpin3.5pl6} 1710 25

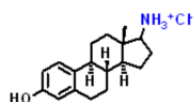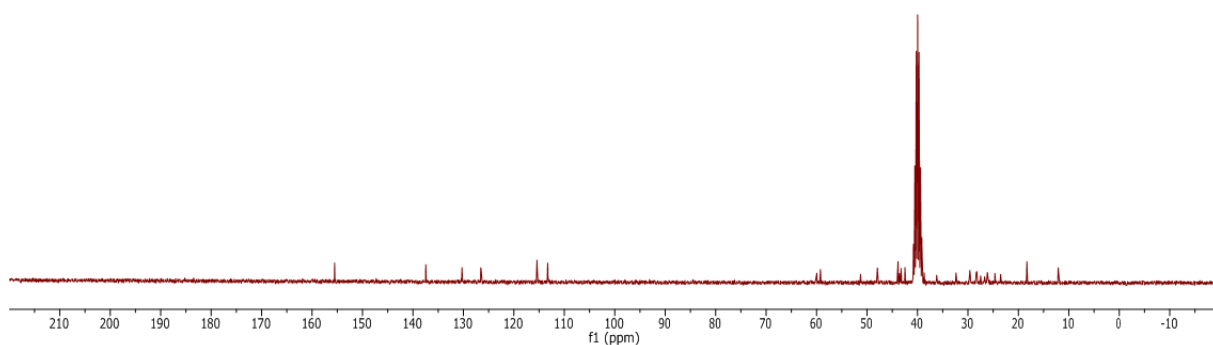

**Supplementary Figure 138.** <sup>13</sup>C NMR spectrum

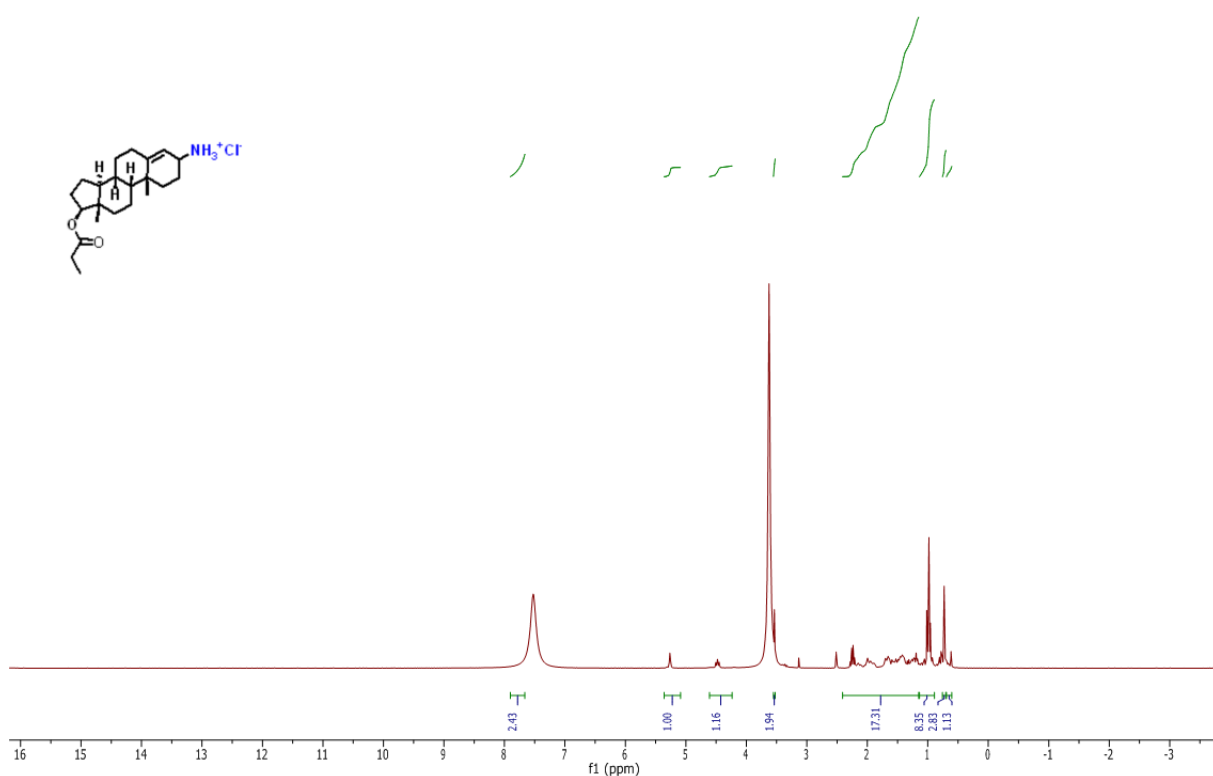

Supplementary Figure 139. <sup>1</sup>H NMR spectrum

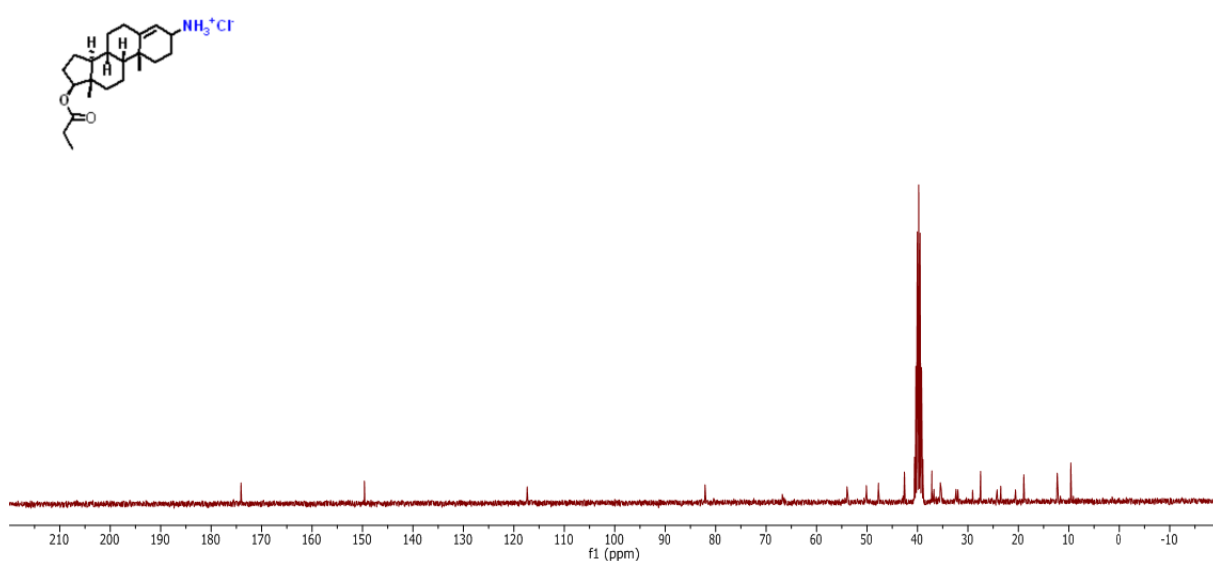

Supplementary Figure 140. <sup>13</sup>C NMR spectrum

1/1109.f341.10.fid  
Thiru TMS-493  
PROTON DMSO {C:\Bruker\TopSpin3.5pl6} 1711 41

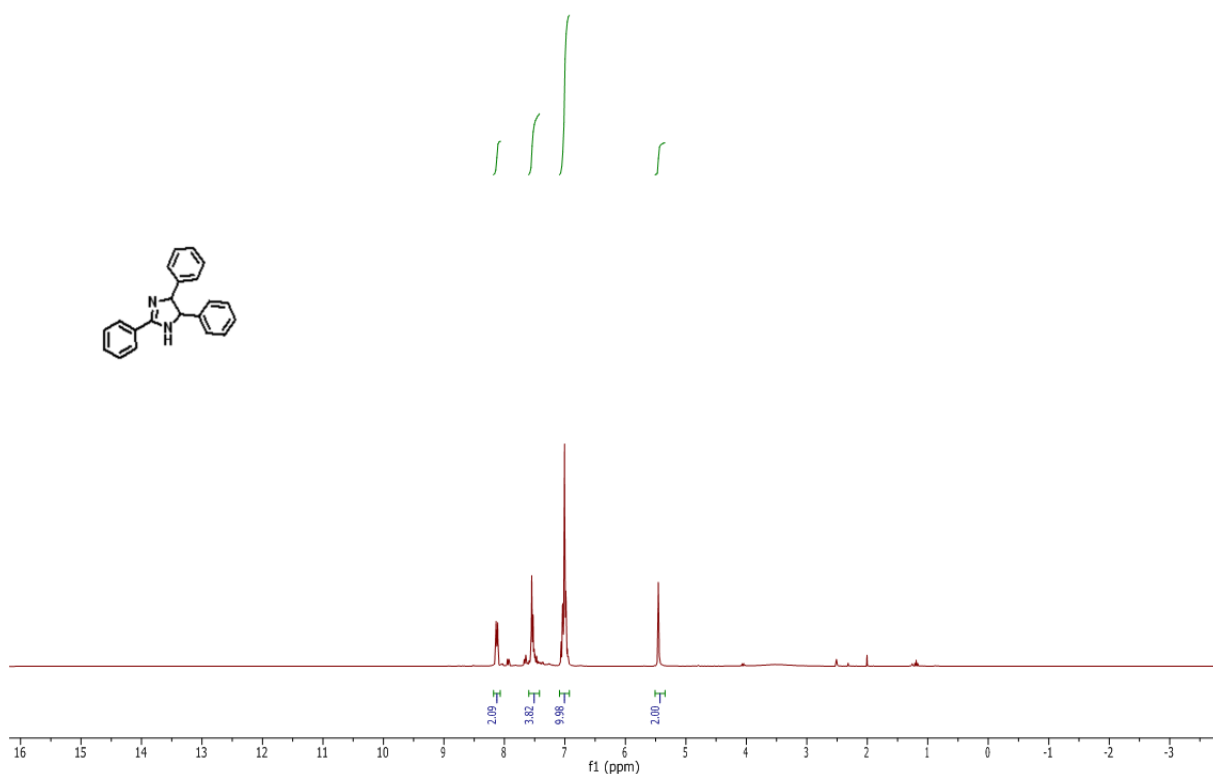

Supplementary Figure 141. <sup>1</sup>H NMR spectrum

1/1109.f341.11.fid  
Thiru TMS-493  
C13CPD DMSO {C:\Bruker\TopSpin3.5pl6} 1711 41

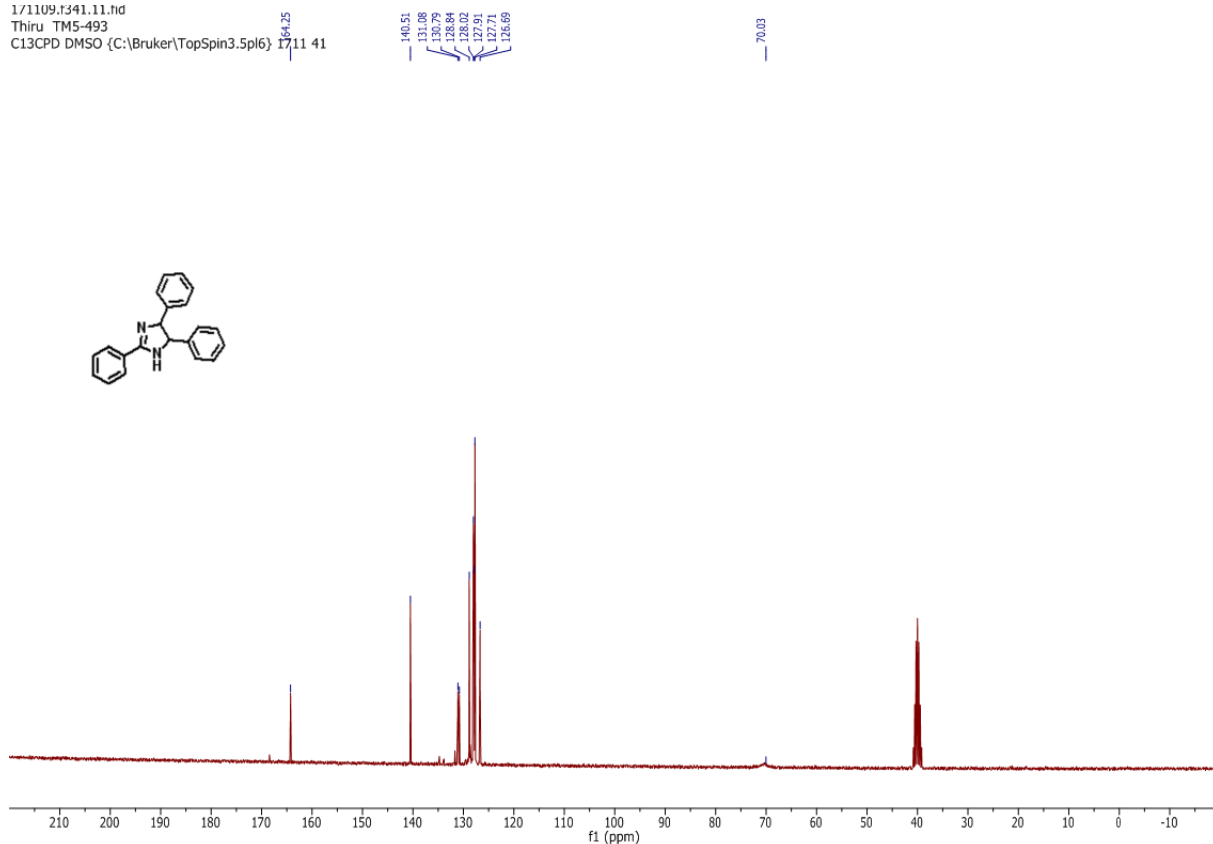

Supplementary Figure 142. <sup>13</sup>C NMR spectrum
